# Supplementary material for: Actinotignum schaalii: Relation to Concomitants and Connection to Patients’ Conditions in Polymicrobial Biofilms of Urinary Tract Catheters and Urines
Source: Microorganisms. 2021 Mar 23;9(3):669. doi: 10.3390/microorganisms9030669 (PMC8004716; doi:10.3390/microorganisms9030669)
Supplement: Supplementary file 1 [file microorganisms-09-00669-s001.zip › Supplementary_Tables_proofread.xlsx]

## Sheet: Table S1
Supplementary tables Actinotignum schaalii: relation to concomitants and connection to patients’ conditions in polymicrobial biofilms of urinary tract catheters and urines.
Iva Kotásková, Vít Syrovátka, Hana Obručová, Petra Vídeňská, Barbora Zwinsová, Veronika Holá, Eva Blaštíková, Filip Růžička, Tomáš Freiberger
Table S1: Patients’ metadata
Patient nr.	Type of catheter	Sex	Age	A. schaalii presence	Renal colic	Hydronephrosis with ureter stricture	Hydronephrosis	Urolithiasis	Prostate cancer	Bladder cancer	Any malignancy
1	DJC	M	61	0	0	1	1	1	0	0	1
2	DJC	M	43	0	1	0	0	1	0	0	0
3	DJC	F	62	0	1	0	0	1	0	0	0
4	DJC	M	70	0	0	0	1	1	0	0	0
5	DJC	M	56	0	0	0	0	1	0	0	0
6	DJC	M	37	0	1	0	0	1	0	0	0
7	DJC	M	47	0	1	0	1	1	0	1	1
10	DJC	M	79	0	1	0	1	1	0	0	0
11	DJC	F	69	0	0	0	1	1	0	0	0
12	DJC	M	84	0	0	0	1	0	1	0	1
13	DJC	M	73	1	0	0	1	1	1	0	1
14	DJC	F	54	0	0	0	1	1	0	0	0
15	DJC	F	83	0	1	0	1	1	0	0	0
17	DJC	M	40	0	0	0	0	1	0	0	0
18	DJC	M	66	1	0	1	1	0	1	0	1
19	DJC	M	62	0	1	0	1	1	0	0	0
20	DJC	M	81	0	0	0	1	0	0	0	1
22	DJC	M	53	0	1	0	1	1	0	0	0
25	DJC	F	67	0	1	0	0	1	0	0	0
27	DJC	M	42	0	1	0	0	1	0	0	0
29	DJC	M	60	0	0	0	1	1	0	0	0
30	DJC	F	68	1	0	1	1	1	0	0	0
31	DJC	F	51	0	1	0	0	0	0	0	0
32	DJC	M	41	1	1	0	1	1	0	0	0
34	DJC	F	47	0	1	0	0	0	0	0	0
36	DJC	F	84	0	0	1	1	0	0	0	0
37	DJC	M	31	0	0	0	0	1	0	0	0
38	DJC	F	71	0	0	0	1	1	0	0	0
42	UC	M	72	1	0	0	0	0	0	0	0
43	UC	M	74	1	0	0	0	0	0	0	0
46	DJC	F	55	1	1	0	1	1	0	0	0
47	UC	M	78	0	0	0	0	0	0	1	1
48	UC	F	75	0	0	0	1	0	0	0	0
49	UC	M	86	0	0	0	0	0	0	1	1
50	UC	M	67	0	0	0	0	0	0	0	0
51	DJC	F	68	0	0	1	1	1	0	0	0
52	DJC	F	71	0	1	0	1	1	0	0	0
53	UC	M	71	0	0	0	0	0	0	0	1
57	UC	M	86	0	0	0	0	0	1	0	1
58	UC	M	77	0	0	0	0	0	0	0	0
59	UC	M	86	0	0	0	1	0	0	0	0
60	UC	M	82	0	0	0	0	0	0	0	0
63	UC	M	85	1	0	0	0	0	0	0	0
64	UC	M	27	0	0	0	0	0	0	0	0
65	UC	M	75	0	0	0	0	0	0	0	0
66	UC	M	82	0	0	0	0	0	0	0	0
68	UC	M	83	1	0	0	0	0	0	0	0
69	UC	M	81	1	0	0	0	0	0	0	0
70	DJC	M	62	0	1	0	1	1	0	0	0
71	UC	M	78	0	0	0	0	0	0	1	1
72	UC	M	68	0	0	0	0	0	0	0	0
73	UC	M	56	1	0	0	0	0	0	0	0
74	UC	M	88	0	0	0	0	0	0	0	0
76	UC	M	68	0	0	0	0	0	0	0	0
77	UC	M	75	1	0	0	0	0	0	1	1
80	UC	M	71	1	0	0	0	0	0	0	0
81	UC	M	70	0	0	0	0	0	1	0	1
82	DJC	M	72	0	1	0	1	1	0	0	0
83	UC	M	78	1	0	0	0	0	0	0	0
84	UC	M	83	0	0	0	0	0	1	0	1
91	UC	M	86	1	0	0	0	0	0	0	0
92	UC	M	61	0	0	0	0	0	1	0	1
95	DJC	M	51	0	1	0	0	1	0	0	0
96	UC	M	87	0	0	0	0	0	1	0	1
97	UC	M	91	1	0	0	0	0	0	0	0
99	UC	M	71	0	0	0	0	0	1	0	1
100	UC	M	63	1	0	0	0	0	0	0	0
101	UC	M	92	0	0	0	0	0	0	0	0
103	UC	M	74	1	0	0	0	0	0	0	0
111	UC	M	68	1	0	0	0	0	1	0	1
112	UC	M	71	0	0	0	0	0	0	0	0
113	UC	M	85	1	0	0	0	0	0	0	0
117	UC	M	83	1	0	0	0	0	1	0	1
118	UC	M	89	0	0	0	0	0	0	0	0
119	UC	M	70	0	0	0	1	0	0	0	0
120	UC	M	84	0	0	0	0	0	0	0	0
121	DJC	F	87	1	0	1	1	0	0	0	0
122	DJC	F	54	1	1	1	1	1	0	0	0
123	DJC	F	40	1	1	0	0	1	0	0	0
124	UC	M	80	1	0	0	0	0	0	0	0
125	UC	M	57	1	0	0	1	0	0	0	0
126	DJC	F	52	0	1	0	0	1	0	0	0
127	UC	M	85	1	0	0	0	0	0	0	0
128	UC	M	87	0	0	0	0	0	0	0	0
129	UC	M	88	0	0	0	0	0	0	0	0
132	DJC	F	58	0	1	0	0	1	0	0	0
133	UC	M	84	1	0	0	0	0	1	0	1
134	UC	M	84	0	0	0	0	0	0	0	0
137	UC	F	84	1	0	0	1	0	0	0	0
139	UC	M	80	0	0	0	0	0	1	0	1
140	UC	M	79	0	0	0	0	0	1	0	1
141	DJC	F	88	0	0	0	1	1	0	0	1
142	DJC	F	61	0	1	0	0	1	0	0	0
143	UC	M	85	0	0	0	1	0	0	1	1
144	UC	M	82	0	0	0	0	0	1	0	1
145	UC	M	77	0	0	0	0	0	0	0	0
147	UC	M	51	1	0	0	0	0	1	0	1
148	DJC	F	72	0	0	0	0	1	0	0	0
149	DJC	M	75	0	0	0	1	0	0	0	0
150	DJC	M	67	1	0	0	0	1	0	1	1
152	UC	M	84	1	0	0	0	0	0	0	0
153	DJC	F	66	1	0	1	1	1	0	0	0
154	UC	M	68	0	0	0	0	0	1	0	1
155	DJC	M	28	1	1	0	0	1	0	0	0
156	DJC	F	41	0	0	0	0	1	0	0	0
157	UC	M	82	0	0	0	0	0	0	0	0
158	UC	M	77	1	0	0	0	0	0	0	1
159	UC	M	70	1	0	0	0	0	0	0	0
161	DJC	M	33	1	0	0	0	1	0	0	0
162	DJC	F	82	1	0	0	1	1	0	0	0
163	UC	M	44	0	0	0	0	1	0	0	0
164	UC	M	79	0	0	0	1	0	0	0	0
166	UC	M	77	0	0	0	0	0	0	0	0
167	UC	M	72	0	0	0	0	0	0	0	0
168	UC	M	79	0	0	0	0	0	0	0	0
169	UC	M	77	0	0	0	0	0	1	0	1
170	UC	M	84	0	0	0	0	0	0	0	0
172	DJC	F	71	1	0	0	1	0	0	0	0
173	UC	M	79	1	0	0	0	0	1	0	1
177	DJC	F	56	1	0	1	1	1	0	0	1
179	UC	M	72	0	0	0	1	0	0	0	0
180	UC	M	70	0	0	0	0	0	1	0	1
181	UC	M	72	0	0	0	0	0	0	0	0
182	UC	M	91	0	0	0	0	0	0	0	1
184	DJC	F	66	0	0	1	1	0	0	0	0
185	DJC	F	63	1	0	1	1	0	0	0	0
186	DJC	F	44	1	0	1	1	1	0	0	0
197	DJC	F	64	0	0	0	1	0	0	0	0
Summary		A. schaalii positive
		43	0.336	% of all samples
males	96	31	0.323	% of males
females	32	12	0.375	% of femaels
DJC	55	17	0.309	% of DJC
UC	73	26	0.356	% of UC
In total	128

## Sheet: Table S2
Table S2: Sample species matrix of joined culture an PCR-DGGE-S results
Type of catheter	Material	Patient nr.	Actinobaculum schaalii	Acinetobacter baumanii/calcoaceticus	Acinetobacter calcocaeticus	Acinetobacter johnsonii	Actinomyces europaeus	Actinomyces neuri	Actinomyces radicidentis	Actinomyces turicensis	Aerococcus sp.	Aerococcus urinae	Alcaligenes faecalis	Alloscardovia omnicolens	Anaerococcus murdochii	Anaerococcus vaginalis	Atopobium parvulum	Bacteroides coagulans	Bifidobacterium bifidum	Bifidobacterium breve	Bifidobacterium breve/adolescentis	Bifidobacterium casei	Bifidobacterium dentium	Bifidobacterium pseudocatenulatum	Burkholderiales sp.	Campylobacter concisus	Campylobacter curvus	Campylobacter curvus/rectus	Campylobacter sp.	Campylobacter ureolyticus	Cellulosimicrobium funkei	Citrobacter amalonaticus/koseri	Citrobacter braakii	Citrobacter farmeri	Citrobacter freundii	Citrobacter koseri	Citrobacter koseri(diversus)	Citrobacter sp.	Corynebacterium amycolatum	Corynebacterium aurimucosum	Corynebacterium coyleae	Corynebacterium glucuronolyticum	Corynebacterium kroppenstedtii	Corynebacterium mucifaciens	Corynebacterium mycetoides	Corynebacterium pilbarense/ureicelerivorans	Corynebacterium sp.	Corynebacterium sp.	Corynebacterium timonense
UC	Sonication fluid	100	1	0	0	0	0	0	0	0	0	0	0	0	0	0	0	0	0	0	0	0	0	0	0	0	0	0	0	0	0	0	0	0	0	0	0	0	0	0	0	0	0	0	0	0	0	0	0
UC	Urine	100	1	0	0	0	0	0	0	0	0	0	0	0	0	0	0	0	0	0	0	0	0	0	0	0	0	0	0	0	0	0	0	0	0	0	0	0	0	0	0	0	0	0	0	0	0	0	0
UC	Sonication fluid	101	0	0	0	0	0	0	0	0	0	0	0	0	0	0	0	0	0	0	0	0	0	0	0	0	0	0	1	0	0	0	0	0	0	0	0	0	0	0	0	0	0	0	0	0	0	0	0
UC	Urine	101	0	0	0	0	0	0	0	0	0	0	0	0	0	0	0	0	0	0	0	0	0	0	0	0	0	0	0	0	0	0	0	0	0	0	0	0	0	0	0	0	0	0	0	0	0	0	0
UC	Sonication fluid	103	1	0	0	0	0	0	0	0	0	0	0	0	0	0	0	0	0	0	0	0	0	0	0	0	0	0	0	0	0	0	0	0	1	0	0	0	0	0	0	0	0	0	0	0	0	0	0
UC	Urine	103	0	0	0	0	0	0	0	0	0	0	0	0	0	0	0	0	0	0	0	0	0	0	0	0	0	0	0	0	0	0	0	0	1	0	0	0	0	0	0	0	0	0	0	0	0	0	0
DJC	Sonication fluid, distal tip	10	0	0	0	0	0	0	0	0	0	0	0	0	0	0	0	0	0	0	0	0	0	0	0	0	0	0	0	0	0	0	0	0	0	0	0	0	0	0	0	0	0	0	0	0	0	0	0
DJC	Sonication fluid, proximal tip	10	0	0	0	0	0	0	0	0	0	0	0	0	0	0	0	0	0	0	0	0	0	0	0	0	0	0	0	0	0	0	0	0	0	0	0	0	0	0	0	0	0	0	0	0	0	0	0
DJC	Urine	10	0	0	0	0	0	0	0	0	0	0	0	0	0	0	0	0	0	0	0	0	0	0	0	0	0	0	0	0	0	0	0	0	0	0	0	0	0	0	0	0	0	0	0	0	0	0	0
UC	Sonication fluid	111	1	0	0	0	0	0	0	0	0	1	0	0	0	0	0	0	0	0	0	0	0	0	0	0	0	0	0	0	0	0	0	0	0	0	0	0	0	0	0	0	0	0	0	0	0	0	0
UC	Urine	111	1	0	0	0	0	0	0	0	0	1	0	0	0	0	0	0	0	0	0	0	0	0	0	0	0	0	0	0	0	0	0	0	0	0	0	0	0	0	0	0	0	0	0	0	0	0	0
UC	Sonication fluid	112	0	0	0	0	0	0	0	0	0	0	0	0	0	0	0	0	0	0	0	0	0	0	0	0	0	0	0	0	0	0	0	0	0	0	0	0	0	0	0	0	0	0	0	0	0	0	0
UC	Urine	112	0	0	0	0	0	0	0	0	0	0	0	0	0	0	0	0	0	0	0	0	0	0	0	0	0	0	0	0	0	0	0	0	0	0	0	0	0	0	0	0	0	0	0	0	0	0	0
UC	Sonication fluid	113	1	0	0	0	0	0	0	0	0	0	0	0	0	0	0	0	0	0	0	0	0	0	0	0	0	0	0	0	0	0	0	0	0	0	0	0	0	0	0	0	0	0	0	0	0	0	0
UC	Urine	113	1	0	0	0	0	0	0	0	0	0	0	0	0	0	0	0	0	0	0	0	0	0	0	0	0	0	0	0	0	0	0	0	0	0	0	0	0	0	0	0	0	0	0	0	0	0	0
UC	Sonication fluid	117	1	0	0	0	0	0	0	0	0	0	0	0	0	0	0	0	0	0	0	0	0	0	0	0	0	0	0	0	0	0	0	0	0	0	0	0	0	0	0	0	0	0	0	0	0	0	0
UC	Urine	117	1	0	0	0	0	0	0	0	0	0	0	0	0	0	0	0	0	0	0	0	0	0	0	0	0	0	0	0	0	0	0	0	0	0	0	0	0	0	0	0	0	0	0	0	0	0	0
UC	Sonication fluid	118	0	0	0	0	0	0	0	0	0	0	0	0	0	0	0	0	0	0	0	0	0	0	0	0	0	1	0	0	0	0	0	0	0	0	0	0	0	0	0	0	0	0	0	0	0	0	0
UC	Urine	118	0	0	0	0	0	0	0	0	0	0	0	0	0	0	0	0	0	0	0	0	0	0	0	0	0	1	0	0	0	0	0	0	0	0	0	0	0	0	0	0	0	0	0	0	0	0	0
UC	Sonication fluid	119	0	0	0	0	0	0	0	0	0	0	0	0	0	1	0	0	0	0	0	0	0	0	0	0	0	0	0	0	0	0	0	0	0	0	0	1	0	0	0	0	0	0	0	0	0	0	0
UC	Urine	119	0	0	0	0	0	0	0	0	0	0	0	0	0	1	0	0	0	0	0	0	0	0	0	0	0	0	0	0	0	0	0	0	0	0	0	1	0	0	0	0	0	0	0	0	0	0	0
DJC	Sonication fluid, distal tip	11	0	0	0	0	0	0	0	0	0	0	0	0	0	0	0	0	0	0	0	0	0	0	0	0	0	0	0	0	0	0	0	0	0	0	0	0	0	0	0	0	0	0	0	0	0	0	0
DJC	Sonication fluid, proximal tip	11	0	0	0	0	0	0	0	0	0	0	0	0	0	0	0	0	0	0	0	0	0	0	0	0	0	0	0	0	0	0	0	0	0	0	0	0	0	0	0	0	0	0	0	0	0	0	0
DJC	Urine	11	0	0	0	0	0	0	0	0	0	0	0	0	0	0	0	0	0	0	0	0	0	0	0	0	0	0	0	0	0	0	0	0	0	0	0	0	0	0	0	0	0	0	0	0	0	0	0
UC	Sonication fluid	120	0	0	0	0	0	0	0	0	0	0	1	0	0	0	0	0	0	0	0	0	0	0	0	0	0	0	0	0	0	0	1	0	0	0	0	0	0	0	0	0	0	0	0	0	0	0	0
DJC	Sonication fluid, distal tip	121	1	0	0	0	0	0	0	0	0	0	0	0	0	0	0	0	0	0	0	0	0	0	0	0	0	0	0	0	0	0	0	0	0	0	0	0	0	0	0	0	0	0	0	0	0	0	0
DJC	Sonication fluid, proximal tip	121	0	0	0	0	0	0	0	0	0	0	0	0	0	0	0	0	0	0	0	0	0	0	0	0	0	0	0	0	0	0	0	0	0	0	0	0	0	0	0	0	0	0	0	0	0	0	0
DJC	Urine	121	0	0	0	0	0	0	0	0	0	0	0	0	0	0	0	0	0	0	0	0	0	0	0	0	0	0	0	0	0	0	0	0	0	0	0	0	0	0	0	0	0	0	0	0	0	0	0
DJC	Sonication fluid, distal tip	122	1	0	0	0	0	0	0	0	0	1	0	0	0	0	0	0	0	0	0	0	1	0	0	0	0	0	0	0	0	0	0	0	0	0	0	1	0	0	0	0	0	0	0	0	0	0	0
DJC	Sonication fluid, proximal tip	122	1	0	0	0	0	0	0	0	0	1	0	0	0	0	0	0	0	0	0	0	1	0	0	0	0	0	0	0	0	0	0	0	0	0	0	1	0	0	0	0	0	0	0	0	0	0	0
DJC	Urine	122	0	0	0	0	0	0	0	0	0	0	0	0	0	0	0	0	0	0	0	0	1	0	0	0	0	0	0	0	0	0	0	0	0	0	0	0	0	0	0	0	0	0	0	0	0	0	0
DJC	Sonication fluid, distal tip	123	0	0	0	0	0	0	0	0	0	0	0	0	0	0	0	0	0	0	0	0	0	0	0	0	0	0	0	0	0	0	0	0	0	0	0	0	0	0	0	0	0	0	0	0	0	0	0
DJC	Sonication fluid, proximal tip	123	1	0	0	0	0	0	0	0	0	0	0	0	0	0	0	0	0	0	0	0	0	0	0	0	0	0	0	0	0	0	0	0	0	0	0	0	0	0	0	0	0	0	0	0	0	0	0
DJC	Urine	123	1	0	0	0	0	0	0	0	0	0	0	0	0	0	0	0	0	0	0	0	0	0	0	0	0	0	0	0	0	0	0	0	0	0	0	0	0	0	0	0	0	0	0	0	0	0	0
UC	Sonication fluid	124	0	0	0	0	0	0	0	0	0	0	0	0	0	0	0	0	0	0	0	0	0	0	0	0	0	0	0	0	0	0	0	0	0	0	0	0	0	0	0	0	0	0	0	0	0	0	0
UC	Urine	124	1	0	0	0	0	0	0	0	0	0	1	0	0	0	0	0	0	0	0	0	0	0	0	0	0	0	0	0	0	0	0	0	0	0	0	0	0	0	0	0	0	0	0	0	0	0	0
UC	Sonication fluid	125	1	0	0	0	0	0	0	0	1	0	0	0	0	0	0	0	0	0	0	0	0	0	0	0	0	0	0	0	0	0	0	0	0	0	0	0	0	0	0	0	0	0	0	0	0	0	0
UC	Urine	125	1	0	0	0	0	0	0	0	0	0	0	0	0	0	0	0	0	0	0	0	0	0	0	0	0	0	0	0	0	0	0	0	0	0	0	0	0	0	0	0	0	0	0	0	0	0	0
DJC	Sonication fluid, distal tip	126	0	0	0	0	0	0	0	0	0	0	0	0	0	0	0	0	0	0	0	0	0	0	0	0	0	0	0	0	0	0	0	0	0	0	0	0	0	0	0	0	0	0	0	0	0	0	0
DJC	Sonication fluid, proximal tip	126	0	0	0	0	0	0	0	0	0	0	0	0	0	0	0	0	0	0	0	0	0	0	0	0	0	0	0	0	0	0	0	0	0	0	0	0	0	0	0	0	0	0	0	0	0	0	0
DJC	Urine	126	0	0	0	0	0	0	0	0	0	0	0	0	0	0	0	0	0	0	0	0	0	0	0	0	0	0	0	0	0	0	0	0	0	0	0	0	0	0	0	0	0	0	0	0	0	0	0
UC	Sonication fluid	127	1	0	0	0	0	0	0	0	0	0	1	0	0	0	0	0	0	0	0	0	0	0	0	0	0	0	0	0	0	0	0	0	0	0	0	0	0	0	0	0	0	0	0	0	0	0	0
UC	Urine	127	0	0	0	0	0	0	0	0	0	0	1	0	0	0	0	0	0	0	0	0	0	0	0	0	1	0	0	0	0	0	0	0	0	0	0	0	0	0	0	0	0	0	0	0	0	0	0
UC	Sonication fluid	128	0	0	0	0	0	0	0	0	0	0	0	0	0	0	0	0	0	0	0	0	0	0	1	0	0	0	0	0	0	0	0	0	0	0	0	0	0	0	0	0	0	0	0	0	0	0	0
UC	Urine	128	0	0	0	0	0	0	0	0	0	0	0	0	0	0	0	0	0	0	0	0	0	0	0	0	0	0	0	0	0	0	0	0	0	0	0	0	0	0	0	0	0	0	0	0	0	0	0
UC	Sonication fluid	129	0	0	0	0	0	0	0	0	0	0	0	0	0	0	0	0	0	0	0	0	0	0	0	0	0	0	0	0	0	0	0	0	0	0	0	0	0	0	0	0	0	0	0	0	0	0	0
UC	Urine	129	0	0	0	0	0	0	0	0	0	0	0	0	0	0	0	0	0	0	0	0	0	0	0	0	0	0	0	0	0	0	0	0	0	0	0	0	0	0	0	0	0	0	0	0	0	0	0
DJC	Sonication fluid, distal tip	12	0	0	0	0	0	0	0	0	0	0	0	0	0	0	0	0	0	0	0	0	0	0	0	0	0	0	0	0	0	0	0	0	0	0	0	0	0	0	0	0	0	0	0	0	0	0	0
DJC	Sonication fluid, proximal tip	12	0	0	0	0	0	0	0	0	0	0	0	0	0	0	0	0	0	0	0	0	0	0	0	0	0	0	0	0	0	0	0	0	0	0	0	0	0	0	0	0	0	0	0	0	0	0	0
DJC	Urine	12	0	0	0	0	0	0	0	0	0	0	0	0	0	0	0	0	0	0	0	0	0	0	0	0	0	0	0	0	0	0	0	0	0	0	0	0	0	0	0	0	0	0	0	0	0	0	0
DJC	Sonication fluid, distal tip	132	0	0	0	0	0	0	0	0	0	0	0	0	0	0	0	0	0	0	0	0	0	0	0	0	0	0	0	0	0	0	0	0	0	0	0	0	0	0	0	0	0	0	0	0	0	0	0
DJC	Sonication fluid, proximal tip	132	0	0	0	0	0	0	0	0	0	0	0	0	0	0	0	0	0	0	0	0	0	0	0	0	0	0	0	0	0	0	0	0	0	0	0	0	0	0	0	0	0	0	0	0	0	0	0
DJC	Urine	132	1	0	0	0	0	0	0	0	0	1	0	0	0	0	0	0	0	0	0	0	0	0	0	0	0	0	0	0	0	0	0	0	0	0	0	0	0	0	0	0	0	0	0	0	0	0	0
UC	Sonication fluid	133	1	0	0	0	0	0	0	0	0	1	0	0	0	0	0	0	0	0	0	0	0	0	0	0	0	0	0	0	0	0	0	0	0	0	0	0	0	0	0	0	0	0	0	0	0	0	0
UC	Urine	133	1	0	0	0	0	0	0	0	0	1	0	0	0	0	0	0	0	0	0	0	0	0	0	0	0	0	0	0	0	0	0	0	0	0	0	0	0	0	0	0	0	0	0	0	0	0	0
UC	Sonication fluid	134	0	0	0	0	0	0	0	0	0	0	0	0	0	0	0	0	0	0	0	0	0	0	0	0	0	0	0	0	0	0	0	0	0	0	0	0	0	0	0	0	0	0	0	0	0	0	0
UC	Urine	134	0	0	0	0	0	0	0	0	0	0	0	0	0	0	0	0	0	0	0	0	0	0	0	0	0	0	0	0	0	0	0	0	0	0	0	0	0	0	0	0	0	0	0	0	0	0	0
UC	Sonication fluid	137	1	0	0	0	0	0	0	0	0	0	0	0	0	0	0	0	0	0	0	0	0	0	0	0	0	0	0	0	0	0	0	0	0	0	0	0	0	0	0	0	0	0	0	0	0	0	0
UC	Urine	137	0	0	0	0	0	0	0	0	0	0	0	0	0	0	0	0	0	0	0	0	0	0	0	0	0	0	0	0	0	0	0	0	0	0	0	0	0	0	0	0	0	0	0	0	0	0	0
UC	Sonication fluid	139	0	0	0	0	0	0	0	0	0	0	0	0	0	0	0	0	0	0	0	0	1	0	0	0	0	0	0	0	0	0	0	0	0	0	0	0	0	0	0	0	0	0	0	0	0	0	0
UC	Urine	139	0	0	0	0	0	0	0	0	0	0	0	0	0	0	0	0	0	0	0	0	1	0	0	0	0	0	0	0	0	0	0	0	0	0	0	0	0	0	0	0	0	0	0	0	0	0	0
DJC	Sonication fluid, distal tip	13	1	0	0	0	0	0	0	0	0	0	0	0	0	0	0	0	0	0	0	0	0	0	0	0	0	0	0	0	0	0	0	0	0	0	0	0	0	0	0	0	0	0	0	1	0	0	0
DJC	Sonication fluid, proximal tip	13	0	0	0	0	0	0	0	0	0	0	0	0	0	0	0	0	0	0	0	0	0	0	0	0	0	0	0	0	0	0	0	0	0	0	0	0	0	0	0	0	0	0	0	1	0	0	0
DJC	Urine	13	0	0	0	0	0	0	0	0	0	0	0	0	0	0	0	0	0	0	0	0	0	0	0	0	0	0	0	0	0	0	0	0	0	0	0	0	0	0	0	0	0	0	0	1	0	0	0
UC	Sonication fluid	140	0	0	0	0	0	0	0	0	0	0	0	0	0	0	0	0	0	0	0	0	0	0	0	0	0	0	0	0	0	0	0	0	0	0	0	0	0	0	0	0	0	0	0	0	0	0	0
UC	Urine	140	0	0	0	0	0	0	0	0	0	0	0	0	0	0	0	0	0	0	0	0	0	0	0	0	0	0	0	0	0	0	0	0	0	0	0	0	0	0	0	0	0	0	0	0	0	0	0
DJC	Sonication fluid, distal tip	141	0	0	0	0	0	0	0	0	0	0	0	0	0	0	0	0	0	0	0	0	0	0	0	0	0	0	0	0	0	0	0	0	0	0	0	0	0	0	0	0	0	0	0	0	0	0	0
DJC	Sonication fluid, proximal tip	141	0	0	0	0	0	0	0	0	0	0	0	0	0	0	0	0	0	0	0	0	0	0	0	0	0	0	0	0	0	0	0	0	0	0	0	0	0	0	0	0	0	0	0	0	0	0	0
DJC	Urine	141	0	0	0	0	0	0	0	0	0	0	0	0	0	0	0	0	0	0	0	0	1	1	0	0	0	0	0	0	0	0	0	0	0	0	0	0	0	0	0	0	0	0	0	0	0	0	0
DJC	Sonication fluid, distal tip	142	0	0	0	0	0	0	0	0	0	0	0	0	0	0	0	0	0	0	0	0	1	1	0	0	0	0	0	0	0	0	0	0	0	0	0	0	0	0	0	0	0	0	0	0	0	0	0
DJC	Sonication fluid, proximal tip	142	0	0	0	0	0	0	0	0	0	0	0	0	0	0	0	0	0	0	0	1	1	1	0	0	0	0	0	0	0	0	0	0	0	0	0	0	0	0	0	0	0	0	0	0	0	0	0
DJC	Urine	142	0	0	0	0	0	0	0	0	0	0	0	0	0	0	0	0	0	0	0	0	1	1	0	0	0	0	0	0	0	0	0	0	0	0	0	0	0	0	0	0	0	0	0	0	0	0	0
UC	Sonication fluid	143	0	0	0	0	0	0	0	0	0	0	0	0	0	0	0	0	0	0	0	0	0	0	0	0	0	0	0	0	0	0	0	0	0	0	0	0	0	0	0	0	0	0	0	0	0	0	0
UC	Urine	143	0	0	0	0	0	0	0	0	0	0	0	0	0	0	0	0	0	0	0	0	0	0	0	0	0	0	0	0	0	0	0	0	0	0	0	0	0	0	0	0	0	0	0	0	0	0	0
UC	Sonication fluid	144	0	0	0	0	0	0	0	0	0	0	0	0	0	0	0	0	0	0	0	0	0	0	0	0	0	0	0	0	0	0	0	0	0	0	0	0	0	0	0	0	0	0	0	0	0	0	0
UC	Sonication fluid	145	0	0	0	0	0	0	0	0	0	0	0	0	0	0	0	0	0	0	0	0	0	0	0	0	0	0	0	0	0	0	0	0	0	0	0	0	0	0	0	0	0	0	0	0	0	0	0
UC	Urine	145	0	0	0	0	0	0	0	0	0	0	0	0	0	0	0	0	0	0	0	0	0	0	0	0	0	0	0	0	0	0	0	0	0	0	0	0	0	0	0	0	0	0	0	0	0	0	0
UC	Sonication fluid	147	1	0	0	0	0	0	0	0	0	0	1	0	0	0	0	0	0	0	0	0	0	0	0	0	0	0	0	0	0	0	0	0	0	0	0	0	0	0	0	0	0	0	0	0	0	0	0
UC	Urine	147	0	0	0	0	0	0	0	0	0	0	0	0	0	0	0	0	0	0	0	0	0	0	0	0	0	0	0	0	0	0	0	0	0	0	0	0	0	0	0	0	0	0	0	0	0	0	0
DJC	Sonication fluid, distal tip	148	0	0	0	0	0	0	0	0	0	0	0	0	0	0	0	0	0	0	0	0	0	0	0	0	0	0	0	1	0	0	0	0	0	0	0	0	0	0	0	0	0	0	0	0	0	0	0
DJC	Sonication fluid, proximal tip	148	0	0	0	0	0	0	0	0	0	0	0	0	0	0	0	0	0	0	0	0	0	0	0	0	0	0	0	1	0	0	0	0	0	0	0	0	0	0	0	0	0	0	0	0	0	0	0
DJC	Urine	148	0	0	0	0	0	0	0	0	0	0	0	0	0	0	0	0	0	0	0	0	0	0	0	0	0	0	0	0	0	0	0	0	0	0	0	0	0	0	0	0	0	0	0	0	0	0	0
DJC	Sonication fluid, distal tip	149	0	0	0	0	0	0	0	0	0	0	0	0	0	0	0	0	0	0	0	0	0	0	0	0	0	0	0	0	0	0	0	0	0	0	0	0	0	0	0	0	0	0	0	0	0	0	0
DJC	Sonication fluid, proximal tip	149	0	0	0	0	0	0	0	0	0	0	0	0	0	0	0	0	0	0	0	0	0	0	0	0	0	0	0	0	0	0	0	0	0	0	0	0	0	0	0	0	0	0	0	0	0	0	0
DJC	Urine	149	0	0	0	0	0	0	0	0	0	0	0	0	0	0	0	0	0	0	0	0	0	0	0	0	0	0	0	0	0	0	0	0	0	0	0	0	0	0	0	0	0	0	0	0	0	0	0
DJC	Sonication fluid, distal tip	14	0	0	0	0	1	0	0	0	0	0	0	0	0	0	0	0	0	0	0	0	0	0	0	0	0	0	0	0	0	0	0	0	0	0	0	0	0	0	0	0	0	0	0	0	0	0	0
DJC	Sonication fluid, proximal tip	14	0	0	0	0	0	0	0	0	0	0	0	0	0	0	0	0	0	0	0	0	0	0	0	0	0	0	0	0	0	0	0	0	0	0	0	0	0	0	0	0	0	0	0	0	0	0	0
DJC	Urine	14	0	0	0	0	0	0	0	0	0	0	0	0	0	0	0	0	0	0	0	0	0	0	0	0	0	0	0	0	0	0	0	0	0	0	0	0	0	0	0	0	0	0	0	0	0	0	0
DJC	Sonication fluid, distal tip	150	1	0	0	0	0	0	0	0	0	0	0	0	0	0	1	0	0	0	0	0	0	0	0	1	0	0	0	0	0	0	0	0	0	0	0	0	0	0	0	0	0	0	0	0	0	0	0
DJC	Sonication fluid, proximal tip	150	1	0	0	0	0	0	0	0	0	0	0	0	0	0	1	0	0	0	0	0	0	0	0	1	0	0	0	0	0	0	0	0	0	0	0	0	0	0	0	0	0	0	0	0	0	0	0
DJC	Urine	150	1	0	0	0	0	0	0	0	0	0	0	0	0	0	1	0	0	0	0	0	0	0	0	1	0	0	0	0	0	0	0	0	0	0	0	0	0	0	0	0	0	0	0	0	0	0	0
UC	Sonication fluid	152	1	0	0	0	0	0	0	0	0	0	0	0	0	0	1	0	0	0	0	0	0	0	0	0	0	0	0	0	0	0	0	0	0	0	0	0	0	0	0	0	0	0	0	0	0	0	0
UC	Urine	152	1	0	0	0	0	0	0	0	0	0	0	0	0	0	0	0	0	0	0	0	0	0	0	0	0	0	0	0	0	0	0	0	0	0	0	0	0	0	0	0	0	0	0	0	0	0	0
DJC	Sonication fluid, proximal tip	153	1	0	0	0	0	0	0	0	0	0	0	0	0	0	0	0	0	0	0	0	0	0	0	0	0	0	0	0	0	0	0	0	0	0	0	0	0	0	0	0	0	0	0	0	0	0	0
DJC	Urine	153	1	0	0	0	0	0	0	0	0	0	0	0	0	0	0	0	0	0	0	0	0	0	0	0	0	0	0	0	0	0	0	0	0	0	0	0	0	0	0	0	0	0	0	0	0	0	0
UC	Sonication fluid	154	0	0	0	0	0	0	0	0	0	0	0	0	0	0	0	0	0	0	0	0	0	0	0	0	0	0	0	0	0	0	0	1	0	0	0	0	0	0	0	0	0	0	0	0	0	0	0
UC	Urine	154	0	0	0	0	0	0	0	0	0	0	0	0	0	0	0	0	0	0	0	0	0	0	0	0	0	0	0	0	0	0	0	1	0	0	0	0	0	0	0	0	0	0	0	0	0	0	0
DJC	Sonication fluid, distal tip	155	1	0	0	0	0	0	0	0	0	0	0	0	0	0	0	0	0	0	0	0	0	0	0	0	0	0	0	1	0	0	0	0	0	0	0	0	0	0	0	0	0	0	0	0	0	0	0
DJC	Sonication fluid, proximal tip	155	1	0	0	0	0	0	0	0	0	0	0	0	0	0	0	0	0	0	0	0	0	0	0	0	0	0	0	1	0	0	0	0	0	0	0	0	0	0	0	0	0	0	0	0	0	0	0
DJC	Sonication fluid, distal tip	156	0	0	0	0	0	0	0	0	0	0	0	0	0	0	0	0	0	0	0	0	0	0	0	0	0	0	0	0	0	0	0	0	0	0	0	0	0	0	0	0	0	0	0	0	0	0	0
DJC	Sonication fluid, proximal tip	156	0	0	0	0	0	0	0	0	0	0	0	0	0	0	0	0	0	0	0	0	0	0	0	0	0	0	0	0	0	0	0	0	0	0	0	0	0	0	0	0	0	0	0	0	0	0	0
DJC	Urine	156	0	0	0	0	0	0	0	0	0	0	0	0	0	0	0	0	0	0	0	0	0	0	0	0	0	0	0	0	0	0	0	0	0	0	0	0	0	0	0	0	0	0	0	0	0	0	0
UC	Sonication fluid	157	0	0	0	0	0	0	0	0	0	0	0	0	0	0	0	0	0	0	0	0	0	0	0	0	0	0	0	0	0	0	0	0	0	0	0	0	0	0	0	0	0	0	0	0	0	0	0
UC	Urine	157	0	0	0	0	0	0	0	0	0	0	0	0	0	0	0	0	0	0	0	0	0	0	0	0	0	0	0	0	0	0	0	0	0	0	0	0	0	0	0	0	0	0	0	0	0	0	0
UC	Sonication fluid	158	1	0	0	0	0	0	0	0	0	0	0	0	0	0	0	0	0	0	0	0	0	0	0	0	0	0	0	1	0	0	0	0	0	0	0	0	0	0	0	0	0	0	0	0	0	0	0
UC	Urine	158	0	0	0	0	0	0	0	0	0	0	0	0	0	0	0	0	0	0	0	0	0	0	0	0	0	0	0	0	0	0	0	0	0	0	0	0	0	0	0	0	0	0	0	0	0	0	0
UC	Sonication fluid	159	1	0	0	0	0	0	0	0	0	0	0	0	0	0	0	0	0	0	0	0	0	0	0	0	0	0	0	1	0	0	0	0	0	0	0	0	0	0	0	0	0	0	0	0	0	0	0
UC	Urine	159	0	0	0	0	0	0	0	0	0	0	0	0	0	0	0	0	0	0	0	0	0	0	0	0	0	0	0	0	0	0	0	0	0	0	0	0	0	0	1	0	0	0	0	0	0	0	0
DJC	Sonication fluid, distal tip	15	0	0	0	0	0	0	0	0	0	0	0	0	0	0	0	0	0	0	0	0	0	0	0	0	0	0	0	0	0	0	0	0	0	0	0	0	0	0	0	0	0	0	0	0	0	0	0
DJC	Sonication fluid, proximal tip	15	0	0	0	0	0	0	0	0	0	0	0	0	0	0	0	0	0	0	0	0	0	0	0	0	0	0	0	0	0	0	0	0	0	0	0	0	0	0	0	0	0	0	0	0	0	0	0
DJC	Urine	15	0	0	0	0	0	0	0	0	0	0	0	0	0	0	0	0	0	0	0	0	0	0	0	0	0	0	0	0	0	0	0	0	0	0	0	0	0	0	0	0	0	0	0	0	0	0	0
DJC	Sonication fluid, distal tip	161	1	0	0	0	0	0	0	0	0	0	0	0	0	0	0	1	0	0	0	0	0	0	0	0	0	0	0	0	0	0	0	0	0	0	0	0	0	0	0	0	0	0	0	0	0	0	0
DJC	Sonication fluid, proximal tip	161	1	0	0	0	0	0	0	0	0	0	0	0	0	0	0	1	0	0	0	0	0	0	0	0	0	0	0	0	0	0	0	0	0	0	0	0	0	0	0	0	0	0	0	0	0	0	0
DJC	Urine	161	0	0	0	0	0	0	0	0	0	0	0	0	0	0	0	0	0	0	0	0	0	0	0	0	0	0	0	0	0	0	0	0	0	0	0	0	0	0	0	0	0	0	0	0	0	0	0
DJC	Sonication fluid, distal tip	162	0	0	0	0	0	0	0	0	0	0	0	0	0	0	0	0	0	0	0	0	0	0	0	0	0	0	0	0	0	0	0	0	0	0	0	0	0	0	0	0	0	0	0	0	0	0	0
DJC	Sonication fluid, proximal tip	162	1	0	0	0	0	0	0	0	0	0	0	0	0	0	0	0	0	0	0	0	0	0	0	0	0	0	0	0	0	0	0	0	0	0	0	0	0	0	0	0	0	0	0	0	0	0	0
DJC	Urine	162	0	0	0	0	0	0	0	0	0	0	0	0	0	0	0	0	0	0	0	0	0	0	0	0	0	0	0	0	0	0	0	0	0	0	0	0	0	0	0	0	0	0	0	0	0	0	0
UC	Sonication fluid	163	0	0	0	0	0	0	0	0	0	0	0	0	0	0	0	0	0	0	0	0	0	0	0	0	0	0	0	0	0	0	0	0	0	0	0	0	0	0	0	0	0	0	0	0	0	0	0
UC	Urine	163	0	0	0	0	0	0	0	0	0	0	0	0	0	0	0	0	0	0	0	0	0	0	0	0	0	0	0	0	0	0	0	0	0	0	0	0	0	0	0	0	0	0	0	0	0	0	0
UC	Sonication fluid	164	0	0	0	0	0	0	1	0	0	0	0	0	0	0	0	0	0	0	0	0	0	0	0	0	0	0	0	0	0	0	0	0	0	0	0	0	0	0	0	0	0	0	0	0	0	0	0
UC	Urine	164	0	0	0	0	0	0	1	0	0	0	0	0	0	0	0	0	0	0	0	0	0	0	0	0	0	0	0	0	0	0	0	0	0	0	0	0	0	0	0	0	0	0	0	0	0	0	0
UC	Sonication fluid	166	0	0	0	0	0	0	0	0	0	0	0	0	0	0	0	0	0	0	0	0	0	0	0	0	0	0	0	0	0	0	0	0	1	0	0	0	0	0	0	0	0	0	0	0	0	0	0
UC	Urine	166	0	0	0	0	0	0	0	0	0	0	0	0	0	0	0	0	0	0	0	0	0	0	0	0	0	0	0	0	0	0	0	0	1	0	0	0	0	0	0	0	0	0	0	0	0	0	0
UC	Sonication fluid	167	0	0	0	0	0	0	0	0	0	0	0	0	0	0	0	0	0	0	0	0	0	0	0	0	0	0	0	1	0	0	0	0	1	0	0	0	0	0	0	0	0	0	0	0	0	0	0
UC	Urine	167	0	0	0	0	0	0	0	0	0	0	0	0	0	0	0	0	0	0	0	0	0	0	0	0	0	0	0	0	0	0	0	0	1	0	0	0	0	0	0	0	0	0	0	0	0	0	0
UC	Sonication fluid	168	0	0	0	0	0	0	0	0	0	0	0	0	0	0	0	0	0	0	0	0	0	0	0	0	0	0	0	1	0	0	0	0	0	0	0	0	0	0	0	0	0	0	0	0	0	0	0
UC	Urine	168	0	0	0	0	0	0	0	0	0	0	0	0	0	0	0	0	0	0	0	0	0	0	0	0	0	0	0	1	0	0	0	0	0	0	0	0	0	0	0	0	0	0	0	0	0	0	0
UC	Sonication fluid	169	0	0	0	0	0	0	0	0	0	0	0	0	0	0	0	0	0	0	0	0	0	0	0	0	0	0	0	0	0	0	0	0	0	0	0	0	0	0	0	0	0	0	0	0	0	0	0
UC	Urine	169	0	0	0	0	0	0	0	0	0	0	0	0	0	0	0	0	0	0	0	0	0	0	0	0	0	0	0	0	0	0	0	0	0	0	0	0	0	0	0	0	0	0	0	0	0	0	0
UC	Sonication fluid	170	0	0	0	0	0	0	0	0	0	0	0	0	0	0	0	0	0	0	1	0	0	0	0	0	0	0	0	0	0	0	0	0	0	0	0	0	0	0	0	0	0	0	0	0	0	0	0
DJC	Sonication fluid, distal tip	172	1	0	0	0	0	0	0	0	0	0	0	0	0	0	0	0	0	0	0	0	0	0	0	0	0	0	0	0	0	0	0	0	0	0	0	0	0	0	0	0	0	0	0	0	0	0	0
DJC	Sonication fluid, proximal tip	172	1	0	0	0	0	0	0	0	0	0	0	0	0	0	0	0	0	0	0	0	0	0	0	0	0	0	0	0	0	0	0	0	0	0	0	0	0	0	0	0	0	0	0	0	0	0	0
DJC	Urine	172	1	0	0	0	0	0	0	0	0	0	0	0	0	0	0	0	0	0	0	0	0	0	0	0	0	0	0	0	0	0	0	0	0	0	0	0	0	0	0	0	0	0	0	0	0	0	0
UC	Sonication fluid	173	0	0	0	0	0	0	0	0	0	0	0	0	0	0	0	0	0	0	0	0	0	0	0	0	0	0	0	0	0	0	0	0	0	0	0	0	0	0	0	0	0	0	0	0	0	0	0
UC	Urine	173	1	0	0	0	0	0	0	0	0	0	0	0	0	0	0	0	0	0	0	0	0	0	0	0	0	0	0	0	0	0	0	0	0	0	0	0	0	0	0	0	0	0	0	0	0	0	0
DJC	Sonication fluid, distal tip	177	1	0	0	0	0	0	0	0	0	0	0	0	0	0	0	0	0	0	0	0	0	0	0	0	0	0	0	0	0	0	0	0	0	0	0	0	0	0	0	0	0	0	0	0	0	0	0
DJC	Sonication fluid, proximal tip	177	1	0	0	0	0	0	0	0	0	0	0	0	0	0	0	0	0	0	0	0	0	0	0	0	0	0	0	0	0	0	0	0	0	0	0	0	0	0	0	0	0	0	0	0	0	0	0
DJC	Urine	177	1	0	0	0	0	0	0	0	0	0	0	0	0	0	0	0	0	0	0	0	0	0	0	0	0	0	0	0	0	0	0	0	0	0	0	0	0	0	0	0	0	0	0	0	0	0	0
UC	Sonication fluid	179	0	0	0	0	0	0	0	0	0	0	0	0	0	0	0	0	0	0	0	0	0	0	0	0	0	0	0	0	0	0	0	0	0	0	0	0	0	0	0	0	0	0	0	0	0	0	0
UC	Urine	179	0	0	0	0	0	0	0	0	0	0	0	0	0	0	0	0	0	0	0	0	0	0	0	0	0	0	0	0	0	0	0	0	0	0	0	0	0	0	0	0	0	0	0	0	0	0	0
DJC	Sonication fluid, distal tip	17	0	0	0	0	0	0	0	0	0	0	0	0	0	0	0	0	0	0	0	0	0	0	0	0	0	0	0	0	0	0	0	0	0	0	0	0	0	0	0	0	0	0	0	0	0	0	0
DJC	Sonication fluid, proximal tip	17	0	0	0	0	0	0	0	0	0	0	0	0	0	0	0	0	0	0	0	0	0	0	0	0	0	0	0	0	0	0	0	0	0	0	0	0	0	0	0	0	0	0	0	0	0	0	0
DJC	Urine	17	0	0	0	0	0	0	0	0	0	0	0	0	0	0	0	0	0	0	0	0	0	0	0	0	0	0	0	0	0	0	0	0	0	0	0	0	0	0	0	0	0	0	0	0	0	0	0
UC	Sonication fluid	180	0	0	0	0	0	0	0	0	0	0	0	0	0	0	0	0	0	0	0	0	0	0	0	0	0	0	0	0	0	0	0	0	0	0	0	0	0	0	0	0	0	0	0	0	0	0	0
UC	Urine	180	0	0	0	0	0	0	0	0	0	0	0	0	0	0	0	0	0	0	0	0	0	0	0	0	0	0	0	0	0	0	0	0	0	0	0	0	0	0	0	0	0	0	0	0	0	0	0
UC	Sonication fluid	181	0	0	1	0	0	0	0	0	0	0	0	0	0	0	0	0	0	0	0	0	0	0	0	0	0	0	0	0	0	0	0	0	0	0	0	0	0	0	0	0	0	0	0	0	0	0	0
UC	Urine	181	0	1	0	0	0	0	0	0	0	0	0	0	0	0	0	0	0	0	0	0	0	0	0	0	0	0	0	0	0	0	0	0	0	0	0	0	0	0	0	0	0	0	0	0	0	0	0
UC	Sonication fluid	182	0	0	0	0	0	0	0	0	0	0	0	0	0	0	0	0	0	0	0	0	0	0	0	0	0	0	0	0	0	0	0	0	0	0	0	0	0	0	0	0	0	0	0	0	0	0	0
UC	Urine	182	0	0	0	0	0	0	0	0	0	0	0	0	0	0	0	0	0	0	0	0	0	0	0	0	0	0	0	0	0	0	0	0	0	0	0	0	1	0	0	0	0	0	0	0	0	0	0
DJC	Sonication fluid, distal tip	184	0	1	0	0	0	0	0	0	0	0	0	0	0	0	0	0	0	0	0	0	0	0	0	0	0	0	0	0	0	0	0	0	0	0	0	0	0	0	0	0	0	0	0	0	0	0	0
DJC	Sonication fluid, proximal tip	184	0	0	0	0	0	0	0	0	0	0	0	0	0	0	0	0	0	0	0	0	0	0	0	0	0	0	0	0	0	0	0	0	0	0	0	0	0	0	0	0	0	0	0	0	0	0	0
DJC	Urine	184	0	0	0	0	0	0	0	0	0	0	0	0	0	0	0	0	0	0	0	0	0	0	0	0	0	0	0	0	0	0	0	0	0	0	0	0	0	0	1	0	0	0	0	0	0	0	0
DJC	Sonication fluid, distal tip	185	0	0	0	0	0	0	0	0	0	0	0	0	0	0	0	0	0	0	0	0	0	0	0	0	0	0	0	0	1	0	0	0	0	0	0	0	0	0	0	0	0	0	0	0	0	0	0
DJC	Sonication fluid, proximal tip	185	1	0	0	0	0	0	0	0	0	0	0	0	0	0	0	0	0	0	0	0	0	0	0	0	0	0	0	0	0	0	0	0	0	0	0	0	0	0	0	0	0	0	0	0	0	0	0
DJC	Urine	185	0	0	0	0	0	0	0	0	0	0	0	0	0	0	0	0	0	0	0	0	0	0	0	0	0	0	0	0	1	0	0	0	0	0	0	0	0	0	0	0	0	0	0	0	0	0	0
DJC	Sonication fluid, distal tip	186	1	0	0	0	0	0	0	0	0	0	0	0	0	0	0	0	0	0	0	0	0	0	0	0	0	0	0	0	0	0	0	0	0	0	0	0	0	0	0	0	0	0	0	0	0	0	0
DJC	Sonication fluid, proximal tip	186	1	0	0	0	0	0	0	0	0	0	0	0	0	0	0	0	0	0	0	0	0	0	0	0	0	0	0	0	0	0	0	0	0	0	0	0	0	0	0	0	0	0	0	0	0	0	0
DJC	Urine	186	1	0	0	0	0	0	0	0	0	0	0	0	0	0	0	0	0	0	0	0	0	0	0	0	0	0	0	0	0	0	0	0	0	0	0	0	0	0	0	0	0	0	0	0	0	0	0
DJC	Sonication fluid, distal tip	18	0	0	0	1	0	0	0	0	0	0	0	0	0	0	0	0	0	0	0	0	0	0	0	0	0	0	0	0	0	0	0	0	1	0	0	0	0	0	0	0	0	0	0	0	0	0	0
DJC	Sonication fluid, proximal tip	18	0	0	0	0	0	0	0	0	0	0	0	0	0	0	0	0	0	0	0	0	0	0	0	0	0	0	0	0	0	0	0	0	0	0	0	0	0	0	0	0	0	0	0	0	0	0	0
DJC	Urine	18	1	0	0	0	0	0	0	0	0	0	0	0	0	0	0	1	0	0	0	0	0	0	0	0	0	0	0	0	0	0	0	0	0	0	0	0	0	0	0	0	0	0	0	0	1	0	0
DJC	Sonication fluid, distal tip	197	0	0	0	0	0	1	0	0	0	0	0	0	0	0	0	0	0	0	0	0	0	0	0	0	1	0	0	0	0	0	0	0	0	0	0	0	0	0	0	0	0	0	0	0	0	0	0
DJC	Sonication fluid, proximal tip	197	0	0	0	0	0	0	0	0	0	0	0	0	0	0	0	0	0	0	0	0	0	0	0	0	1	0	0	0	0	0	0	0	0	0	0	0	0	0	0	0	0	0	0	0	0	0	0
DJC	Urine	197	0	0	0	0	0	1	0	0	0	0	0	0	0	0	0	0	0	0	0	0	0	0	0	0	1	0	0	0	0	0	0	0	0	0	0	0	0	0	0	0	0	0	0	0	0	0	0
DJC	Sonication fluid, distal tip	19	0	0	0	0	0	0	0	0	0	0	0	0	0	0	0	0	0	0	0	0	0	0	0	0	0	0	0	0	0	0	0	0	0	0	0	0	0	0	0	0	0	0	0	0	0	0	0
DJC	Sonication fluid, proximal tip	19	0	0	0	0	0	0	0	0	0	0	0	0	0	0	0	0	0	0	0	0	0	0	0	0	0	0	0	0	0	0	0	0	0	0	0	0	0	0	0	0	0	0	0	0	0	0	0
DJC	Urine	19	0	0	0	0	0	0	0	0	0	0	0	0	0	0	0	0	0	0	0	0	0	0	0	0	0	0	0	0	0	0	0	0	0	0	0	0	0	0	0	0	0	0	0	0	0	0	0
DJC	Sonication fluid, distal tip	1	0	0	1	0	0	0	0	0	0	0	0	0	0	0	0	0	0	0	0	0	0	0	0	0	0	0	0	0	0	0	0	0	0	0	0	0	0	0	0	0	0	0	0	0	0	0	0
DJC	Sonication fluid, proximal tip	1	0	0	1	0	0	0	0	0	0	0	0	0	0	0	0	0	0	0	0	0	0	0	0	0	0	0	0	0	0	0	0	0	0	0	0	0	0	0	0	0	0	0	0	0	0	0	0
DJC	Urine	1	0	0	0	0	0	0	0	0	0	0	0	0	0	0	0	0	0	0	0	0	0	0	0	0	0	0	0	0	0	0	0	0	0	0	0	0	0	0	0	0	0	0	0	0	0	0	0
DJC	Sonication fluid, distal tip	20	0	0	0	0	0	0	0	0	0	0	0	0	0	0	0	0	0	0	0	0	0	0	0	0	0	0	0	0	0	0	0	0	0	0	0	0	0	0	0	0	0	0	0	0	0	0	0
DJC	Sonication fluid, proximal tip	20	0	0	0	0	0	0	0	0	0	0	0	0	0	0	0	0	0	0	0	0	0	0	0	0	0	0	0	0	0	0	0	0	0	0	0	0	0	0	0	0	0	0	0	0	0	0	0
DJC	Urine	20	0	0	0	0	0	0	0	0	0	0	0	0	0	0	0	0	0	0	0	0	0	0	0	0	0	0	0	0	0	0	0	0	0	0	0	0	0	0	0	0	0	0	0	0	0	0	0
DJC	Sonication fluid, distal tip	22	0	0	0	0	0	0	0	0	0	0	0	0	0	0	0	0	0	0	0	0	0	0	0	0	0	0	0	0	0	0	0	0	0	0	0	0	0	0	0	0	0	0	0	0	0	0	0
DJC	Sonication fluid, proximal tip	22	0	0	0	0	0	0	0	0	0	0	0	0	0	0	0	0	0	0	0	0	0	0	0	0	0	0	0	0	0	0	0	0	0	0	0	0	0	0	0	0	0	0	0	0	0	0	0
DJC	Urine	22	0	0	0	0	0	0	0	0	0	0	0	0	0	0	0	0	0	0	0	0	0	0	0	0	0	0	0	0	0	0	0	0	0	0	0	0	0	0	0	0	0	0	0	0	0	0	0
DJC	Sonication fluid, distal tip	25	0	0	0	0	0	0	0	0	0	0	0	0	0	0	0	0	0	0	0	0	0	0	0	0	0	0	0	0	0	0	0	0	0	0	0	0	0	0	0	0	1	0	0	0	0	0	0
DJC	Sonication fluid, proximal tip	25	0	0	0	0	0	0	0	0	0	0	0	0	0	0	0	0	0	0	0	0	0	0	0	0	0	0	0	0	0	0	0	0	0	0	0	0	0	0	0	0	0	0	0	0	0	0	0
DJC	Urine	25	0	0	0	0	0	0	0	0	0	0	0	0	0	0	0	0	0	0	0	0	0	0	0	0	0	0	0	0	0	0	0	0	0	0	0	0	0	0	0	0	0	0	0	0	0	0	0
DJC	Sonication fluid, distal tip	27	0	0	0	0	0	0	0	0	0	0	0	0	0	0	0	0	0	0	0	0	0	0	0	0	0	0	0	0	0	0	0	0	0	0	0	0	0	0	0	0	0	0	0	0	0	0	0
DJC	Sonication fluid, proximal tip	27	0	0	0	0	0	0	0	0	0	0	0	0	0	0	0	0	0	0	0	0	0	0	0	0	0	0	0	0	0	0	0	0	0	0	0	0	0	0	0	0	1	0	0	0	0	0	0
DJC	Urine	27	0	0	0	0	0	0	0	0	0	0	0	0	0	0	0	0	0	0	0	0	0	0	0	0	0	0	0	0	0	0	0	0	0	0	0	0	0	1	0	0	0	0	0	0	0	0	0
DJC	Sonication fluid, distal tip	29	0	0	0	0	0	0	0	0	0	0	0	0	0	0	0	0	0	0	0	0	0	0	0	0	0	0	0	0	0	0	0	0	0	0	0	0	0	0	0	0	0	0	0	0	0	0	0
DJC	Sonication fluid, proximal tip	29	0	0	0	0	0	0	0	0	0	0	0	0	0	0	0	0	0	0	0	0	0	0	0	0	0	0	0	0	0	0	0	0	0	0	0	0	0	0	0	0	0	0	0	0	0	0	0
DJC	Urine	29	0	0	0	0	0	0	0	0	0	0	0	0	0	0	0	0	0	0	0	0	0	0	0	0	0	0	0	0	0	0	0	0	0	0	0	0	0	0	0	0	0	0	0	0	0	0	0
DJC	Sonication fluid, distal tip	2	0	0	1	0	0	0	0	0	0	0	0	0	0	0	0	0	0	0	0	0	0	0	0	0	0	0	0	0	0	0	0	0	0	0	0	0	0	0	0	0	0	0	0	0	0	0	0
DJC	Sonication fluid, proximal tip	2	0	0	1	0	0	0	0	0	0	0	0	0	0	0	0	0	0	0	0	0	0	0	0	0	0	0	0	0	0	0	0	0	0	0	0	0	0	0	0	0	0	0	0	0	0	0	0
DJC	Urine	2	0	0	0	0	0	0	0	0	0	0	0	0	0	0	0	0	0	0	0	0	0	0	0	0	0	0	0	0	0	0	0	0	0	0	0	0	0	0	0	1	0	0	0	0	0	0	0
DJC	Sonication fluid, distal tip	30	1	0	0	0	0	0	0	0	0	0	0	0	0	0	0	0	0	0	0	0	0	0	0	1	0	0	0	0	0	0	0	0	0	0	0	0	0	0	0	0	0	0	0	0	0	0	0
DJC	Sonication fluid, proximal tip	30	0	0	0	0	0	0	0	0	0	0	0	0	0	0	0	0	0	0	0	0	0	0	0	1	0	0	0	0	0	0	0	0	0	0	0	0	0	0	0	0	0	0	0	0	0	0	0
DJC	Urine	30	1	0	0	0	0	0	0	0	0	0	0	0	0	0	0	0	0	0	0	0	0	0	0	1	0	0	0	0	0	0	0	0	0	0	0	0	0	0	0	0	0	0	0	0	0	0	0
DJC	Sonication fluid, distal tip	31	0	0	0	0	0	0	0	0	0	0	0	0	0	0	0	0	0	0	0	0	0	0	0	0	0	0	0	0	0	0	0	0	0	0	0	0	0	0	0	0	0	0	0	0	0	0	0
DJC	Sonication fluid, proximal tip	31	0	0	0	0	0	0	0	0	0	0	0	0	0	0	0	0	0	0	0	0	0	0	0	0	0	0	0	0	0	0	0	0	0	0	0	0	0	0	0	0	0	0	0	0	0	0	0
DJC	Urine	31	0	0	0	0	0	0	0	0	0	0	0	0	0	0	0	0	0	0	0	0	0	0	0	0	0	0	0	0	0	0	0	0	0	0	0	0	0	0	0	0	0	0	0	0	0	0	0
DJC	Sonication fluid, distal tip	32	0	0	0	0	0	0	0	0	0	0	0	0	0	0	0	0	0	0	0	0	0	0	0	0	0	0	0	0	0	0	0	0	0	0	0	0	0	0	0	0	0	0	0	0	0	0	0
DJC	Sonication fluid, proximal tip	32	1	0	0	0	0	0	0	0	0	0	0	0	0	1	0	0	0	0	0	0	0	0	0	0	0	0	0	1	0	0	0	0	0	0	0	0	0	0	0	0	0	0	0	0	0	0	0
DJC	Urine	32	0	0	0	0	0	0	0	0	0	0	0	0	0	0	0	1	0	0	0	0	0	0	0	0	0	0	0	0	0	0	0	0	0	0	0	0	0	0	0	0	0	0	1	0	0	0	1
DJC	Sonication fluid, distal tip	34	0	0	0	0	0	0	0	0	0	0	0	0	0	0	0	0	0	0	0	0	0	0	0	0	0	0	0	0	0	0	0	0	0	0	0	0	0	0	0	0	0	0	0	0	0	0	0
DJC	Sonication fluid, proximal tip	34	0	0	0	0	0	0	0	0	0	0	0	0	0	0	0	0	0	0	0	0	0	0	0	0	0	0	0	0	0	0	0	0	0	0	0	0	0	0	0	0	0	0	0	0	0	0	0
DJC	Sonication fluid, distal tip	36	0	0	0	0	0	0	0	0	0	0	0	0	0	0	0	0	0	0	0	0	0	0	0	0	0	0	0	0	0	0	0	0	0	0	0	0	0	0	0	0	0	0	0	0	0	0	0
DJC	Sonication fluid, proximal tip	36	0	0	0	0	0	0	0	0	0	0	0	0	0	0	0	0	0	0	0	0	0	0	0	0	0	0	0	0	0	0	0	0	0	0	0	0	0	0	0	0	0	0	0	0	0	0	0
DJC	Urine	36	0	0	0	0	0	0	0	0	0	0	0	0	0	0	0	0	0	0	0	0	0	0	0	0	0	0	0	0	0	0	0	0	0	0	0	0	0	0	0	0	0	0	0	0	0	0	0
DJC	Sonication fluid, distal tip	37	0	0	0	0	0	0	0	0	0	0	0	0	0	0	0	0	0	0	0	0	0	0	0	0	0	0	0	0	0	0	0	0	0	0	0	0	0	0	0	0	0	0	0	0	0	0	0
DJC	Sonication fluid, proximal tip	37	0	0	0	0	0	0	0	0	0	0	0	0	0	0	0	0	0	0	0	0	0	0	0	0	0	0	0	0	0	0	0	0	0	0	0	0	0	0	0	0	0	0	0	0	0	0	0
DJC	Urine	37	0	0	0	0	0	0	0	0	0	0	0	0	0	0	0	0	0	0	0	0	0	0	0	0	0	0	0	0	0	0	0	0	0	0	0	0	0	0	0	0	0	0	0	0	0	0	0
DJC	Sonication fluid, distal tip	38	0	0	0	0	0	0	0	0	0	0	0	0	0	0	0	0	0	0	0	0	0	0	0	0	0	0	0	0	0	0	0	0	0	0	0	0	0	0	0	0	0	0	0	0	0	0	0
DJC	Sonication fluid, proximal tip	38	0	0	0	0	0	0	0	0	0	0	0	0	0	0	0	0	0	0	0	0	0	0	0	0	0	0	0	0	0	0	0	0	0	0	0	0	0	0	0	0	0	0	0	0	0	0	0
DJC	Urine	38	0	0	0	0	0	0	0	0	0	0	0	0	0	0	0	0	0	0	0	0	0	0	0	0	0	0	0	0	0	0	0	0	0	0	0	0	0	0	0	0	0	0	0	0	0	0	0
DJC	Sonication fluid, distal tip	3	0	0	0	0	0	0	0	0	0	0	0	0	0	0	0	0	0	1	0	0	0	0	0	0	0	0	0	0	0	0	0	0	0	0	0	0	0	0	0	0	0	0	0	0	0	0	0
DJC	Sonication fluid, proximal tip	3	0	0	0	0	0	0	0	0	0	0	0	0	0	0	0	0	0	1	0	0	0	0	0	0	0	0	0	0	0	0	0	0	0	0	0	0	0	0	0	0	0	0	0	0	0	0	0
DJC	Urine	3	0	0	0	0	0	0	0	0	0	0	0	0	0	0	0	0	0	1	0	0	0	0	0	0	0	0	0	0	0	0	0	0	0	0	0	0	0	0	0	0	0	0	0	0	0	0	0
UC	Sonication fluid	42	1	0	0	0	0	0	0	0	1	0	0	0	0	0	0	0	0	0	0	0	0	0	0	0	0	0	0	0	0	0	0	0	0	0	1	0	0	0	0	0	0	0	0	0	0	0	0
UC	Sonication fluid	43	1	0	0	0	0	0	0	0	0	0	0	0	0	0	0	0	0	0	0	0	0	0	0	0	0	0	0	0	0	0	0	0	0	0	0	0	0	0	0	0	0	0	0	0	0	0	0
DJC	Sonication fluid, distal tip	46	1	0	0	0	0	0	0	1	0	0	0	1	0	0	0	0	0	0	0	0	0	0	0	0	0	0	0	0	0	0	0	0	0	0	0	0	0	0	0	0	0	0	0	0	0	0	0
DJC	Sonication fluid, proximal tip	46	1	0	0	0	0	0	0	1	0	0	0	1	0	0	0	0	0	0	0	0	0	0	0	0	0	0	0	0	0	0	0	0	0	0	0	0	0	0	0	0	0	0	0	0	0	0	0
DJC	Urine	46	1	0	0	0	0	0	0	1	0	0	0	1	0	0	0	0	0	0	0	0	0	0	0	0	0	0	0	0	0	0	0	0	0	0	0	0	0	0	0	0	0	0	0	0	0	0	0
UC	Sonication fluid	47	0	0	0	0	0	0	0	0	0	0	0	0	0	0	0	0	0	0	0	0	0	0	0	0	0	0	0	0	0	0	0	0	0	0	0	0	0	0	0	0	0	0	0	0	0	0	0
UC	Sonication fluid	48	0	0	0	0	0	0	0	0	0	0	0	0	0	0	0	0	0	0	0	0	0	0	0	0	0	0	0	0	0	0	0	0	0	0	0	0	0	0	0	0	0	0	0	0	0	0	0
UC	Sonication fluid	49	0	0	0	0	0	0	0	0	0	0	0	0	0	0	0	0	0	0	0	0	0	0	0	0	0	0	0	0	0	1	0	0	0	0	0	0	0	0	0	0	0	0	0	0	0	0	0
UC	Urine	49	0	0	0	0	0	0	0	0	0	0	0	0	0	0	0	0	0	0	0	0	0	0	0	0	0	0	0	0	0	1	0	0	0	0	0	0	0	0	0	0	0	0	0	0	0	0	0
DJC	Sonication fluid, distal tip	4	0	0	0	0	0	0	0	0	0	0	0	0	0	0	0	0	0	0	0	0	0	0	0	0	0	0	0	0	0	0	0	0	0	0	0	0	0	0	0	0	0	0	0	0	0	0	0
DJC	Sonication fluid, proximal tip	4	0	0	0	0	0	0	0	0	0	0	0	0	0	0	0	0	0	0	0	0	0	0	0	0	0	0	0	0	0	0	0	0	0	0	0	0	0	0	0	0	0	0	0	0	0	0	0
DJC	Urine	4	0	0	0	0	0	0	0	0	0	0	0	0	0	0	0	0	0	0	0	0	0	0	0	0	0	0	0	0	0	0	0	0	0	0	0	0	0	0	0	0	0	0	0	0	0	0	0
UC	Sonication fluid	50	0	0	0	0	0	0	0	0	0	0	0	0	0	0	0	0	0	0	0	0	0	0	0	0	0	0	0	0	0	0	0	0	0	0	0	0	0	0	0	0	0	0	0	0	0	0	0
UC	Urine	50	0	0	0	0	0	0	0	0	0	0	0	0	0	0	0	0	0	0	0	0	0	0	0	0	0	0	0	0	0	0	0	0	0	0	0	0	0	0	0	0	0	0	0	0	0	0	0
DJC	Sonication fluid, distal tip	51	0	0	0	0	0	0	0	0	0	0	0	0	0	0	0	0	1	0	0	0	0	0	0	0	0	0	0	1	0	0	0	0	0	0	0	0	0	0	0	0	0	0	0	0	0	0	0
DJC	Sonication fluid, proximal tip	51	0	0	0	0	0	0	0	0	0	0	0	0	0	0	0	0	1	0	0	0	0	0	0	0	0	0	0	0	0	0	0	0	0	0	0	0	0	0	0	0	0	0	0	0	0	0	0
DJC	Urine	51	0	0	0	0	0	0	0	0	0	0	0	0	0	0	0	0	1	0	0	0	0	0	0	0	0	0	0	0	0	0	0	0	0	0	0	0	0	0	0	0	0	0	0	0	0	0	0
DJC	Sonication fluid, distal tip	52	0	0	0	0	0	0	0	0	0	0	0	1	0	0	0	0	0	0	0	0	0	0	0	0	0	0	0	1	0	0	0	0	0	0	0	0	0	0	0	0	0	0	0	0	1	0	0
DJC	Sonication fluid, proximal tip	52	0	0	0	0	0	0	0	0	0	0	0	0	0	0	0	0	0	0	0	0	0	0	0	0	0	0	0	1	0	0	0	0	0	0	0	0	0	0	0	0	0	0	0	0	1	0	0
DJC	Urine	52	0	0	0	0	0	0	0	0	0	0	0	1	0	0	0	0	0	0	0	0	0	0	0	0	0	0	0	1	0	0	0	0	0	0	0	0	0	0	0	0	0	0	0	0	1	0	0
UC	Sonication fluid	53	0	0	0	0	0	0	0	0	0	0	0	0	0	0	0	0	0	0	0	0	0	0	0	0	0	0	0	0	0	0	0	0	0	0	0	0	0	0	0	0	0	0	0	0	0	0	0
UC	Urine	53	0	0	0	0	0	0	0	0	0	0	0	0	0	0	0	0	0	0	0	0	0	0	0	0	0	0	0	0	0	0	0	0	0	0	0	0	0	0	0	0	0	0	0	0	0	0	0
UC	Sonication fluid	57	0	0	0	0	0	0	0	0	0	0	0	0	0	0	0	0	0	0	0	0	0	0	0	0	0	0	0	0	0	0	0	0	0	0	0	0	0	0	0	0	0	0	0	0	0	0	0
UC	Urine	57	0	0	0	0	0	0	0	0	0	0	0	0	0	0	0	0	0	0	0	0	0	0	0	0	0	0	0	0	0	0	0	0	0	0	0	0	0	0	0	0	0	0	0	0	0	0	0
UC	Sonication fluid	58	0	0	0	0	0	0	0	0	0	0	0	0	0	0	0	0	0	0	0	0	0	0	0	0	0	0	0	0	0	0	0	0	0	0	0	0	0	0	0	0	0	0	0	0	0	0	0
UC	Urine	58	0	0	0	0	0	0	0	0	0	0	0	0	0	0	0	0	0	0	0	0	0	0	0	0	0	0	0	0	0	0	0	0	0	0	0	0	0	0	0	0	0	0	0	0	0	0	0
UC	Sonication fluid	59	0	0	0	0	0	0	0	0	0	0	0	0	0	0	0	0	0	0	0	0	0	0	0	0	0	0	0	1	0	0	0	0	0	0	0	0	0	0	0	0	0	0	0	0	0	0	0
UC	Urine	59	0	0	0	0	0	0	0	0	0	0	0	0	0	0	0	0	0	0	0	0	0	0	0	0	0	0	0	1	0	0	0	0	0	0	0	0	0	0	0	0	0	0	0	0	0	0	0
DJC	Sonication fluid, distal tip	5	0	0	0	0	0	0	0	0	0	0	0	0	0	0	0	0	0	0	0	0	0	0	0	0	0	0	0	0	0	0	0	0	0	0	0	0	0	0	0	0	0	0	0	0	0	0	0
DJC	Sonication fluid, proximal tip	5	0	0	0	0	0	0	0	0	0	0	0	0	0	0	0	0	0	0	0	0	0	0	0	0	0	0	0	0	0	0	0	0	0	0	0	0	0	0	0	0	0	0	0	0	0	0	0
DJC	Urine	5	0	0	0	0	0	0	0	0	0	0	0	0	0	0	0	0	0	0	0	0	0	0	0	0	0	0	0	0	0	0	0	0	0	0	0	0	0	0	0	1	0	0	0	0	0	0	0
UC	Urine	60	0	0	0	0	0	0	0	0	0	0	0	0	0	0	0	0	0	0	0	0	0	0	0	0	0	0	0	0	0	0	0	0	0	0	0	0	0	0	0	0	0	0	0	0	0	0	0
UC	Sonication fluid	63	1	0	0	0	0	0	0	0	0	0	0	0	0	0	0	0	0	0	0	0	0	0	0	0	0	0	0	1	0	0	0	0	0	0	0	0	0	0	0	0	0	0	0	0	0	0	0
UC	Urine	63	1	0	0	0	0	0	0	0	0	0	0	0	0	0	0	0	0	0	0	0	0	0	0	0	0	0	0	1	0	0	0	0	0	0	0	0	0	0	0	0	0	0	0	0	0	0	0
UC	Sonication fluid	64	0	0	0	0	0	0	0	0	0	0	0	0	0	0	0	0	0	0	0	0	0	0	0	0	0	0	0	0	0	0	0	0	0	0	0	0	0	0	0	0	0	0	0	0	0	0	0
UC	Urine	64	0	0	0	0	0	0	0	0	0	0	0	0	0	0	0	0	0	0	0	0	0	0	0	0	0	0	0	0	0	0	0	0	0	0	0	0	0	0	0	0	0	0	0	0	0	0	0
UC	Sonication fluid	65	0	0	0	0	0	0	0	0	0	1	0	0	0	0	0	0	0	0	0	0	0	0	0	0	0	0	0	0	0	0	0	0	0	0	0	0	0	0	0	0	0	0	0	0	0	0	0
UC	Urine	65	0	0	0	0	0	0	0	0	0	1	0	0	0	0	0	0	0	0	0	0	0	0	0	0	0	0	0	0	0	0	0	0	0	0	0	0	0	0	0	0	0	0	0	0	0	0	0
UC	Sonication fluid	66	0	0	0	0	0	0	0	0	0	0	0	0	0	0	0	0	0	0	0	0	0	0	0	0	0	0	0	0	0	0	0	0	0	0	0	0	0	0	0	0	0	0	0	0	0	0	0
UC	Urine	66	0	0	0	0	0	0	0	0	0	0	0	0	0	0	0	0	0	0	0	0	0	0	0	0	0	0	0	0	0	0	0	0	0	0	0	0	0	0	0	0	0	0	0	0	0	0	0
UC	Sonication fluid	68	1	0	0	0	0	0	0	0	0	0	0	0	0	0	0	0	0	0	0	0	0	0	0	0	0	0	0	1	0	0	0	0	0	0	0	0	0	0	0	0	0	0	0	0	0	0	0
UC	Urine	68	1	0	0	0	0	0	0	0	0	0	0	0	0	0	0	0	0	0	0	0	0	0	0	0	0	0	0	1	0	0	0	0	0	0	0	0	0	0	0	0	0	0	0	0	0	0	0
UC	Sonication fluid	69	1	0	0	0	0	0	0	0	0	0	0	0	0	0	0	0	0	0	0	0	0	0	0	0	0	0	0	0	0	0	0	0	1	0	0	0	0	0	0	0	0	0	0	0	0	0	0
DJC	Sonication fluid, distal tip	6	0	0	0	0	0	0	0	0	0	0	0	0	0	0	0	0	0	0	0	0	0	0	0	0	0	0	0	0	0	0	0	0	0	0	0	0	0	0	0	0	0	0	0	0	1	0	0
DJC	Sonication fluid, proximal tip	6	0	0	0	0	0	0	0	0	0	0	0	0	0	0	0	0	0	0	0	0	0	0	0	0	0	0	0	0	0	0	0	0	0	0	0	0	0	0	0	0	0	1	0	0	0	0	0
DJC	Urine	6	0	0	0	0	0	0	0	0	0	0	0	0	0	0	0	0	0	0	0	0	0	0	0	0	0	0	0	0	0	0	0	0	0	0	0	0	0	0	0	1	0	0	0	0	0	0	0
DJC	Sonication fluid, distal tip	70	0	0	0	0	0	0	0	0	0	0	0	0	0	0	0	0	0	0	0	0	0	0	0	0	0	0	0	0	0	0	0	0	0	0	0	0	0	0	0	0	0	0	0	0	0	0	0
DJC	Sonication fluid, proximal tip	70	0	0	0	0	0	0	0	0	0	0	0	0	0	0	0	0	0	0	0	0	0	0	0	0	0	0	0	0	0	0	0	0	0	0	0	0	0	0	0	0	0	0	0	0	0	0	0
DJC	Urine	70	0	0	0	0	0	0	0	0	0	0	0	0	0	0	0	0	0	0	0	0	0	0	0	0	0	0	0	0	0	0	0	0	0	0	0	0	0	0	0	0	0	0	0	0	0	0	0
UC	Sonication fluid	71	0	0	0	0	0	0	0	0	0	0	0	0	0	0	0	0	0	0	0	0	1	0	0	0	0	0	0	0	0	0	0	0	0	0	0	0	0	0	0	0	0	0	0	0	0	0	0
UC	Sonication fluid	72	0	0	0	0	0	0	0	0	0	0	0	0	0	0	0	0	0	0	0	0	0	0	0	0	0	0	0	0	0	0	0	0	0	0	0	0	0	0	0	0	0	0	0	0	0	0	0
UC	Urine	72	0	0	0	0	0	0	0	0	0	0	0	0	0	0	0	0	0	0	0	0	0	0	0	0	0	0	0	0	0	0	0	0	0	0	0	0	0	0	0	0	0	0	0	0	0	0	0
UC	Sonication fluid	73	1	0	0	0	0	0	0	0	0	0	0	0	0	0	0	0	0	0	0	0	0	0	0	0	0	0	0	0	0	0	0	0	0	0	0	0	0	0	0	0	0	0	0	0	0	1	0
UC	Urine	73	1	0	0	0	0	0	0	0	0	0	0	0	0	0	0	0	0	0	0	0	0	0	0	0	0	0	0	0	0	0	0	0	0	0	0	0	0	0	0	0	0	0	0	0	0	1	0
UC	Sonication fluid	74	0	0	0	0	0	0	0	0	0	0	0	0	0	0	0	0	0	0	0	0	0	0	0	0	0	0	0	1	0	0	0	0	0	0	0	0	0	0	0	0	0	0	0	0	0	0	0
UC	Urine	74	0	0	0	0	0	0	0	0	0	0	0	0	0	0	0	0	0	0	0	0	0	0	0	0	0	0	0	1	0	0	0	0	0	0	0	0	0	0	0	0	0	0	0	0	0	0	0
UC	Sonication fluid	76	0	0	0	0	0	0	0	0	0	0	0	0	0	0	0	0	0	0	0	0	0	0	0	0	0	0	0	0	0	0	0	0	0	0	0	0	0	0	0	0	0	0	0	0	0	0	0
UC	Urine	76	0	0	0	0	0	0	0	0	0	0	0	0	0	0	0	0	0	0	0	0	0	0	0	0	0	0	0	0	0	0	0	0	0	0	0	0	0	0	0	0	0	0	0	0	0	0	0
UC	Sonication fluid	77	1	0	0	0	0	0	0	0	0	0	0	0	0	0	0	0	0	0	0	0	0	0	0	0	0	0	0	0	0	0	0	0	0	0	0	0	0	0	0	0	0	0	0	0	0	0	0
UC	Urine	77	0	0	0	0	0	0	0	0	0	0	0	0	0	0	0	0	0	0	0	0	0	0	0	0	0	0	0	0	0	0	0	0	0	0	0	0	0	0	0	0	0	0	0	0	0	0	0
DJC	Sonication fluid, distal tip	7	0	0	0	0	0	0	0	0	0	0	0	0	0	0	0	0	0	0	0	0	0	0	0	0	0	0	0	0	0	0	0	0	0	0	0	0	0	0	0	0	0	0	0	0	0	0	0
DJC	Sonication fluid, proximal tip	7	0	0	0	0	0	0	0	0	0	0	0	0	0	0	0	0	0	0	0	0	0	0	0	0	0	0	0	0	0	0	0	0	0	0	0	0	0	0	0	0	0	0	0	0	0	0	0
DJC	Urine	7	0	0	0	0	0	0	0	0	0	0	0	0	0	0	0	0	0	0	0	0	0	0	0	0	0	0	0	0	0	0	0	0	0	0	0	0	0	0	0	0	0	0	0	0	0	0	0
UC	Sonication fluid	80	0	0	0	0	0	0	0	0	0	0	0	0	0	0	0	0	0	0	0	0	0	0	0	0	0	0	0	0	0	0	0	0	0	0	0	0	0	0	0	0	0	0	0	0	0	0	0
UC	Urine	80	1	0	0	0	0	0	0	0	0	0	0	0	0	0	0	0	0	0	0	0	0	0	0	0	0	0	0	0	0	0	0	0	0	0	0	0	0	0	0	0	0	0	0	0	0	0	0
UC	Sonication fluid	81	0	0	0	0	0	0	0	0	0	0	0	0	0	0	0	0	0	0	0	0	0	0	0	0	0	0	0	0	0	0	0	0	0	0	0	0	0	0	0	0	0	0	0	0	0	0	0
UC	Urine	81	0	0	0	0	0	0	0	0	0	0	0	0	0	0	0	0	0	0	0	0	0	0	0	0	0	0	0	0	0	0	0	0	0	0	0	0	0	0	0	0	0	0	0	0	0	0	0
DJC	Sonication fluid, distal tip	82	0	0	0	0	0	0	0	0	0	0	0	0	0	0	0	0	0	0	0	0	0	0	0	0	0	0	0	0	0	0	0	0	0	1	0	0	0	0	0	0	0	0	0	0	0	0	0
DJC	Sonication fluid, proximal tip	82	0	0	0	0	0	0	0	0	0	0	0	0	0	0	0	0	0	0	0	0	0	0	0	0	0	0	0	0	0	0	0	0	0	1	0	0	0	0	0	0	0	0	0	0	0	0	0
DJC	Urine	82	0	0	0	0	0	0	0	0	0	0	0	0	0	0	0	0	0	0	0	0	0	0	0	0	0	0	0	0	0	0	0	0	0	0	0	0	0	0	0	0	0	0	0	0	0	0	0
UC	Sonication fluid	83	1	0	0	0	0	0	0	0	0	1	0	0	0	0	0	0	0	0	0	0	0	0	0	0	0	0	0	0	0	1	0	0	0	0	0	0	0	0	0	0	0	0	0	0	0	0	0
UC	Urine	83	1	0	0	0	0	0	0	0	0	1	0	0	0	0	0	0	0	0	0	0	0	0	0	0	0	0	0	0	0	1	0	0	0	0	0	0	0	0	0	0	0	0	0	0	0	0	0
UC	Sonication fluid	84	0	0	0	0	0	0	0	0	0	0	0	0	1	0	0	0	0	0	0	0	0	0	0	0	0	0	0	0	0	0	0	0	0	0	0	0	0	0	0	0	0	0	0	0	0	0	0
UC	Urine	84	0	0	0	0	0	0	0	0	0	1	0	0	0	0	0	0	0	0	0	0	0	0	0	0	0	0	0	0	0	0	0	0	0	0	0	0	0	0	0	0	0	0	0	0	0	0	0
UC	Sonication fluid	91	1	0	0	0	0	0	0	0	0	0	0	0	0	0	0	0	0	0	0	0	0	0	0	0	0	0	0	0	0	0	0	0	0	0	0	0	0	0	0	0	0	0	0	0	0	0	0
UC	Urine	91	1	0	0	0	0	0	0	0	0	0	0	0	0	0	0	0	0	0	0	0	0	0	0	0	0	0	0	0	0	0	0	0	0	0	0	0	0	0	0	0	0	0	0	0	0	0	0
UC	Sonication fluid	92	0	0	0	0	0	0	0	0	0	0	0	0	0	0	0	0	0	0	0	0	0	0	0	0	0	0	0	0	0	0	0	0	0	0	0	0	0	0	0	0	0	0	0	0	0	0	0
UC	Urine	92	0	0	0	0	0	0	0	0	0	0	0	0	0	0	0	0	0	0	0	0	0	0	0	0	0	0	0	0	0	0	0	0	0	0	0	0	0	0	0	0	0	0	0	0	0	0	0
DJC	Sonication fluid, distal tip	95	0	0	0	0	0	0	0	0	0	0	0	0	0	0	0	0	0	0	0	0	0	0	0	0	0	0	0	0	0	0	0	0	0	0	0	0	0	0	0	0	0	0	0	0	0	0	0
DJC	Sonication fluid, proximal tip	95	0	0	0	0	0	0	0	0	0	0	0	0	0	0	0	0	0	0	0	0	0	0	0	0	0	0	0	0	0	0	0	0	0	0	0	0	0	0	0	0	0	0	0	0	0	0	0
DJC	Urine	95	0	0	0	0	0	0	0	0	0	0	0	0	0	0	0	0	0	0	0	0	0	0	0	0	0	0	0	0	0	0	0	0	0	0	0	0	0	0	0	0	0	0	0	0	0	0	0
UC	Sonication fluid	96	0	0	0	0	0	0	0	0	0	0	1	0	0	0	0	0	0	0	0	0	0	0	0	0	0	0	0	0	0	0	0	0	0	0	0	0	0	0	0	0	0	0	0	0	0	0	0
UC	Urine	96	0	0	0	0	0	0	0	0	0	0	1	0	0	0	0	0	0	0	0	0	0	0	0	0	0	0	0	0	0	0	0	0	0	0	0	0	0	0	0	0	0	0	0	0	0	0	0
UC	Sonication fluid	97	1	0	0	0	0	0	0	0	0	0	0	0	0	0	0	0	0	0	0	0	0	0	0	0	0	0	0	0	0	0	0	0	0	0	0	0	0	0	0	0	0	0	0	0	0	0	0
UC	Sonication fluid	99	0	0	0	0	0	0	0	0	0	0	0	0	0	0	0	0	0	0	0	0	0	0	0	0	0	0	0	0	0	0	0	0	0	0	0	0	0	0	0	0	0	0	0	0	0	0	0
UC	Urine	99	0	0	0	0	0	0	0	0	0	0	0	0	0	0	0	0	0	0	0	0	0	0	0	0	0	0	0	0	0	0	0	0	0	0	0	0	0	0	0	0	0	0	0	0	0	0	0
Actinotignum schaalii is in orange
[truncated: 96 more columns]

## Sheet: Table S3
Table S3: Patient species matrix of joined culture an PCR-DGGE-S results
Type of catheter	Patient nr.	Actinobaculum schaalii	Acinetobacter baumanii/calcoaceticus	Acinetobacter calcocaeticus	Acinetobacter johnsonii	Actinomyces europaeus	Actinomyces neuri	Actinomyces radicidentis	Actinomyces turicensis	Aerococcus sp.	Aerococcus urinae	Alcaligenes faecalis	Alloscardovia omnicolens	Anaerococcus murdochii	Anaerococcus vaginalis	Atopobium parvulum	Bacteroides coagulans	Bifidobacterium bifidum	Bifidobacterium breve	Bifidobacterium breve/adolescentis	Bifidobacterium casei	Bifidobacterium dentium	Bifidobacterium pseudocatenulatum	Burkholderiales sp.	Campylobacter concisus	Campylobacter curvus	Campylobacter curvus/rectus	Campylobacter sp.	Campylobacter ureolyticus	Cellulosimicrobium funkei	Citrobacter amalonaticus/koseri	Citrobacter braakii	Citrobacter farmeri	Citrobacter freundii	Citrobacter koseri	Citrobacter koseri(diversus)	Citrobacter sp.	Corynebacterium amycolatum	Corynebacterium aurimucosum	Corynebacterium coyleae	Corynebacterium glucuronolyticum	Corynebacterium kroppenstedtii	Corynebacterium mucifaciens	Corynebacterium mycetoides	Corynebacterium pilbarense/ureicelerivorans	Corynebacterium sp.	Corynebacterium sp.	Corynebacterium timonense	Corynebacterium tuberculostearicum
UC	100	2	0	0	0	0	0	0	0	0	0	0	0	0	0	0	0	0	0	0	0	0	0	0	0	0	0	0	0	0	0	0	0	0	0	0	0	0	0	0	0	0	0	0	0	0	0	0	0
UC	101	0	0	0	0	0	0	0	0	0	0	0	0	0	0	0	0	0	0	0	0	0	0	0	0	0	0	1	0	0	0	0	0	0	0	0	0	0	0	0	0	0	0	0	0	0	0	0	0
UC	103	1	0	0	0	0	0	0	0	0	0	0	0	0	0	0	0	0	0	0	0	0	0	0	0	0	0	0	0	0	0	0	0	2	0	0	0	0	0	0	0	0	0	0	0	0	0	0	0
DJC	10	0	0	0	0	0	0	0	0	0	0	0	0	0	0	0	0	0	0	0	0	0	0	0	0	0	0	0	0	0	0	0	0	0	0	0	0	0	0	0	0	0	0	0	0	0	0	0	0
UC	111	2	0	0	0	0	0	0	0	0	2	0	0	0	0	0	0	0	0	0	0	0	0	0	0	0	0	0	0	0	0	0	0	0	0	0	0	0	0	0	0	0	0	0	0	0	0	0	0
UC	112	0	0	0	0	0	0	0	0	0	0	0	0	0	0	0	0	0	0	0	0	0	0	0	0	0	0	0	0	0	0	0	0	0	0	0	0	0	0	0	0	0	0	0	0	0	0	0	0
UC	113	2	0	0	0	0	0	0	0	0	0	0	0	0	0	0	0	0	0	0	0	0	0	0	0	0	0	0	0	0	0	0	0	0	0	0	0	0	0	0	0	0	0	0	0	0	0	0	0
UC	117	2	0	0	0	0	0	0	0	0	0	0	0	0	0	0	0	0	0	0	0	0	0	0	0	0	0	0	0	0	0	0	0	0	0	0	0	0	0	0	0	0	0	0	0	0	0	0	0
UC	118	0	0	0	0	0	0	0	0	0	0	0	0	0	0	0	0	0	0	0	0	0	0	0	0	0	2	0	0	0	0	0	0	0	0	0	0	0	0	0	0	0	0	0	0	0	0	0	0
UC	119	0	0	0	0	0	0	0	0	0	0	0	0	0	2	0	0	0	0	0	0	0	0	0	0	0	0	0	0	0	0	0	0	0	0	0	2	0	0	0	0	0	0	0	0	0	0	0	0
DJC	11	0	0	0	0	0	0	0	0	0	0	0	0	0	0	0	0	0	0	0	0	0	0	0	0	0	0	0	0	0	0	0	0	0	0	0	0	0	0	0	0	0	0	0	0	0	0	0	0
UC	120	0	0	0	0	0	0	0	0	0	0	1	0	0	0	0	0	0	0	0	0	0	0	0	0	0	0	0	0	0	0	1	0	0	0	0	0	0	0	0	0	0	0	0	0	0	0	0	0
DJC	121	1	0	0	0	0	0	0	0	0	0	0	0	0	0	0	0	0	0	0	0	0	0	0	0	0	0	0	0	0	0	0	0	0	0	0	0	0	0	0	0	0	0	0	0	0	0	0	0
DJC	122	2	0	0	0	0	0	0	0	0	2	0	0	0	0	0	0	0	0	0	0	3	0	0	0	0	0	0	0	0	0	0	0	0	0	0	2	0	0	0	0	0	0	0	0	0	0	0	0
DJC	123	2	0	0	0	0	0	0	0	0	0	0	0	0	0	0	0	0	0	0	0	0	0	0	0	0	0	0	0	0	0	0	0	0	0	0	0	0	0	0	0	0	0	0	0	0	0	0	0
UC	124	1	0	0	0	0	0	0	0	0	0	1	0	0	0	0	0	0	0	0	0	0	0	0	0	0	0	0	0	0	0	0	0	0	0	0	0	0	0	0	0	0	0	0	0	0	0	0	0
UC	125	2	0	0	0	0	0	0	0	1	0	0	0	0	0	0	0	0	0	0	0	0	0	0	0	0	0	0	0	0	0	0	0	0	0	0	0	0	0	0	0	0	0	0	0	0	0	0	0
DJC	126	0	0	0	0	0	0	0	0	0	0	0	0	0	0	0	0	0	0	0	0	0	0	0	0	0	0	0	0	0	0	0	0	0	0	0	0	0	0	0	0	0	0	0	0	0	0	0	0
UC	127	1	0	0	0	0	0	0	0	0	0	2	0	0	0	0	0	0	0	0	0	0	0	0	0	1	0	0	0	0	0	0	0	0	0	0	0	0	0	0	0	0	0	0	0	0	0	0	0
UC	128	0	0	0	0	0	0	0	0	0	0	0	0	0	0	0	0	0	0	0	0	0	0	1	0	0	0	0	0	0	0	0	0	0	0	0	0	0	0	0	0	0	0	0	0	0	0	0	0
UC	129	0	0	0	0	0	0	0	0	0	0	0	0	0	0	0	0	0	0	0	0	0	0	0	0	0	0	0	0	0	0	0	0	0	0	0	0	0	0	0	0	0	0	0	0	0	0	0	0
DJC	12	0	0	0	0	0	0	0	0	0	0	0	0	0	0	0	0	0	0	0	0	0	0	0	0	0	0	0	0	0	0	0	0	0	0	0	0	0	0	0	0	0	0	0	0	0	0	0	0
DJC	132	0	0	0	0	0	0	0	0	0	1	0	0	0	0	0	0	0	0	0	0	0	0	0	0	0	0	0	0	0	0	0	0	0	0	0	0	0	0	0	0	0	0	0	0	0	0	0	0
UC	133	2	0	0	0	0	0	0	0	0	2	0	0	0	0	0	0	0	0	0	0	0	0	0	0	0	0	0	0	0	0	0	0	0	0	0	0	0	0	0	0	0	0	0	0	0	0	0	0
UC	134	0	0	0	0	0	0	0	0	0	0	0	0	0	0	0	0	0	0	0	0	0	0	0	0	0	0	0	0	0	0	0	0	0	0	0	0	0	0	0	0	0	0	0	0	0	0	0	0
UC	137	1	0	0	0	0	0	0	0	0	0	0	0	0	0	0	0	0	0	0	0	0	0	0	0	0	0	0	0	0	0	0	0	0	0	0	0	0	0	0	0	0	0	0	0	0	0	0	0
UC	139	0	0	0	0	0	0	0	0	0	0	0	0	0	0	0	0	0	0	0	0	2	0	0	0	0	0	0	0	0	0	0	0	0	0	0	0	0	0	0	0	0	0	0	0	0	0	0	0
DJC	13	1	0	0	0	0	0	0	0	0	0	0	0	0	0	0	0	0	0	0	0	0	0	0	0	0	0	0	0	0	0	0	0	0	0	0	0	0	0	0	0	0	0	0	3	0	0	0	0
UC	140	0	0	0	0	0	0	0	0	0	0	0	0	0	0	0	0	0	0	0	0	0	0	0	0	0	0	0	0	0	0	0	0	0	0	0	0	0	0	0	0	0	0	0	0	0	0	0	0
DJC	141	0	0	0	0	0	0	0	0	0	0	0	0	0	0	0	0	0	0	0	0	1	1	0	0	0	0	0	0	0	0	0	0	0	0	0	0	0	0	0	0	0	0	0	0	0	0	0	0
DJC	142	0	0	0	0	0	0	0	0	0	0	0	0	0	0	0	0	0	0	0	1	3	3	0	0	0	0	0	0	0	0	0	0	0	0	0	0	0	0	0	0	0	0	0	0	0	0	0	0
UC	143	0	0	0	0	0	0	0	0	0	0	0	0	0	0	0	0	0	0	0	0	0	0	0	0	0	0	0	0	0	0	0	0	0	0	0	0	0	0	0	0	0	0	0	0	0	0	0	0
UC	144	0	0	0	0	0	0	0	0	0	0	0	0	0	0	0	0	0	0	0	0	0	0	0	0	0	0	0	0	0	0	0	0	0	0	0	0	0	0	0	0	0	0	0	0	0	0	0	0
UC	145	0	0	0	0	0	0	0	0	0	0	0	0	0	0	0	0	0	0	0	0	0	0	0	0	0	0	0	0	0	0	0	0	0	0	0	0	0	0	0	0	0	0	0	0	0	0	0	0
UC	147	1	0	0	0	0	0	0	0	0	0	1	0	0	0	0	0	0	0	0	0	0	0	0	0	0	0	0	0	0	0	0	0	0	0	0	0	0	0	0	0	0	0	0	0	0	0	0	0
DJC	148	0	0	0	0	0	0	0	0	0	0	0	0	0	0	0	0	0	0	0	0	0	0	0	0	0	0	0	2	0	0	0	0	0	0	0	0	0	0	0	0	0	0	0	0	0	0	0	0
DJC	149	0	0	0	0	0	0	0	0	0	0	0	0	0	0	0	0	0	0	0	0	0	0	0	0	0	0	0	0	0	0	0	0	0	0	0	0	0	0	0	0	0	0	0	0	0	0	0	0
DJC	14	0	0	0	0	1	0	0	0	0	0	0	0	0	0	0	0	0	0	0	0	0	0	0	0	0	0	0	0	0	0	0	0	0	0	0	0	0	0	0	0	0	0	0	0	0	0	0	0
DJC	150	3	0	0	0	0	0	0	0	0	0	0	0	0	0	3	0	0	0	0	0	0	0	0	3	0	0	0	0	0	0	0	0	0	0	0	0	0	0	0	0	0	0	0	0	0	0	0	0
UC	152	2	0	0	0	0	0	0	0	0	0	0	0	0	0	1	0	0	0	0	0	0	0	0	0	0	0	0	0	0	0	0	0	0	0	0	0	0	0	0	0	0	0	0	0	0	0	0	0
DJC	153	2	0	0	0	0	0	0	0	0	0	0	0	0	0	0	0	0	0	0	0	0	0	0	0	0	0	0	0	0	0	0	0	0	0	0	0	0	0	0	0	0	0	0	0	0	0	0	0
UC	154	0	0	0	0	0	0	0	0	0	0	0	0	0	0	0	0	0	0	0	0	0	0	0	0	0	0	0	0	0	0	0	2	0	0	0	0	0	0	0	0	0	0	0	0	0	0	0	0
DJC	155	2	0	0	0	0	0	0	0	0	0	0	0	0	0	0	0	0	0	0	0	0	0	0	0	0	0	0	2	0	0	0	0	0	0	0	0	0	0	0	0	0	0	0	0	0	0	0	0
DJC	156	0	0	0	0	0	0	0	0	0	0	0	0	0	0	0	0	0	0	0	0	0	0	0	0	0	0	0	0	0	0	0	0	0	0	0	0	0	0	0	0	0	0	0	0	0	0	0	0
UC	157	0	0	0	0	0	0	0	0	0	0	0	0	0	0	0	0	0	0	0	0	0	0	0	0	0	0	0	0	0	0	0	0	0	0	0	0	0	0	0	0	0	0	0	0	0	0	0	0
UC	158	1	0	0	0	0	0	0	0	0	0	0	0	0	0	0	0	0	0	0	0	0	0	0	0	0	0	0	1	0	0	0	0	0	0	0	0	0	0	0	0	0	0	0	0	0	0	0	0
UC	159	1	0	0	0	0	0	0	0	0	0	0	0	0	0	0	0	0	0	0	0	0	0	0	0	0	0	0	1	0	0	0	0	0	0	0	0	0	0	1	0	0	0	0	0	0	0	0	1
DJC	15	0	0	0	0	0	0	0	0	0	0	0	0	0	0	0	0	0	0	0	0	0	0	0	0	0	0	0	0	0	0	0	0	0	0	0	0	0	0	0	0	0	0	0	0	0	0	0	0
DJC	161	2	0	0	0	0	0	0	0	0	0	0	0	0	0	0	2	0	0	0	0	0	0	0	0	0	0	0	0	0	0	0	0	0	0	0	0	0	0	0	0	0	0	0	0	0	0	0	0
DJC	162	1	0	0	0	0	0	0	0	0	0	0	0	0	0	0	0	0	0	0	0	0	0	0	0	0	0	0	0	0	0	0	0	0	0	0	0	0	0	0	0	0	0	0	0	0	0	0	0
UC	163	0	0	0	0	0	0	0	0	0	0	0	0	0	0	0	0	0	0	0	0	0	0	0	0	0	0	0	0	0	0	0	0	0	0	0	0	0	0	0	0	0	0	0	0	0	0	0	0
UC	164	0	0	0	0	0	0	2	0	0	0	0	0	0	0	0	0	0	0	0	0	0	0	0	0	0	0	0	0	0	0	0	0	0	0	0	0	0	0	0	0	0	0	0	0	0	0	0	0
UC	166	0	0	0	0	0	0	0	0	0	0	0	0	0	0	0	0	0	0	0	0	0	0	0	0	0	0	0	0	0	0	0	0	2	0	0	0	0	0	0	0	0	0	0	0	0	0	0	0
UC	167	0	0	0	0	0	0	0	0	0	0	0	0	0	0	0	0	0	0	0	0	0	0	0	0	0	0	0	1	0	0	0	0	2	0	0	0	0	0	0	0	0	0	0	0	0	0	0	0
UC	168	0	0	0	0	0	0	0	0	0	0	0	0	0	0	0	0	0	0	0	0	0	0	0	0	0	0	0	2	0	0	0	0	0	0	0	0	0	0	0	0	0	0	0	0	0	0	0	0
UC	169	0	0	0	0	0	0	0	0	0	0	0	0	0	0	0	0	0	0	0	0	0	0	0	0	0	0	0	0	0	0	0	0	0	0	0	0	0	0	0	0	0	0	0	0	0	0	0	0
UC	170	0	0	0	0	0	0	0	0	0	0	0	0	0	0	0	0	0	0	1	0	0	0	0	0	0	0	0	0	0	0	0	0	0	0	0	0	0	0	0	0	0	0	0	0	0	0	0	0
DJC	172	3	0	0	0	0	0	0	0	0	0	0	0	0	0	0	0	0	0	0	0	0	0	0	0	0	0	0	0	0	0	0	0	0	0	0	0	0	0	0	0	0	0	0	0	0	0	0	0
UC	173	1	0	0	0	0	0	0	0	0	0	0	0	0	0	0	0	0	0	0	0	0	0	0	0	0	0	0	0	0	0	0	0	0	0	0	0	0	0	0	0	0	0	0	0	0	0	0	0
DJC	177	3	0	0	0	0	0	0	0	0	0	0	0	0	0	0	0	0	0	0	0	0	0	0	0	0	0	0	0	0	0	0	0	0	0	0	0	0	0	0	0	0	0	0	0	0	0	0	0
UC	179	0	0	0	0	0	0	0	0	0	0	0	0	0	0	0	0	0	0	0	0	0	0	0	0	0	0	0	0	0	0	0	0	0	0	0	0	0	0	0	0	0	0	0	0	0	0	0	0
DJC	17	0	0	0	0	0	0	0	0	0	0	0	0	0	0	0	0	0	0	0	0	0	0	0	0	0	0	0	0	0	0	0	0	0	0	0	0	0	0	0	0	0	0	0	0	0	0	0	0
UC	180	0	0	0	0	0	0	0	0	0	0	0	0	0	0	0	0	0	0	0	0	0	0	0	0	0	0	0	0	0	0	0	0	0	0	0	0	0	0	0	0	0	0	0	0	0	0	0	0
UC	181	0	1	1	0	0	0	0	0	0	0	0	0	0	0	0	0	0	0	0	0	0	0	0	0	0	0	0	0	0	0	0	0	0	0	0	0	0	0	0	0	0	0	0	0	0	0	0	0
UC	182	0	0	0	0	0	0	0	0	0	0	0	0	0	0	0	0	0	0	0	0	0	0	0	0	0	0	0	0	0	0	0	0	0	0	0	0	1	0	0	0	0	0	0	0	0	0	0	0
DJC	184	0	1	0	0	0	0	0	0	0	0	0	0	0	0	0	0	0	0	0	0	0	0	0	0	0	0	0	0	0	0	0	0	0	0	0	0	0	0	1	0	0	0	0	0	0	0	0	0
DJC	185	1	0	0	0	0	0	0	0	0	0	0	0	0	0	0	0	0	0	0	0	0	0	0	0	0	0	0	0	2	0	0	0	0	0	0	0	0	0	0	0	0	0	0	0	0	0	0	2
DJC	186	3	0	0	0	0	0	0	0	0	0	0	0	0	0	0	0	0	0	0	0	0	0	0	0	0	0	0	0	0	0	0	0	0	0	0	0	0	0	0	0	0	0	0	0	0	0	0	0
DJC	18	1	0	0	1	0	0	0	0	0	0	0	0	0	0	0	1	0	0	0	0	0	0	0	0	0	0	0	0	0	0	0	0	1	0	0	0	0	0	0	0	0	0	0	0	1	0	0	0
DJC	197	0	0	0	0	0	2	0	0	0	0	0	0	0	0	0	0	0	0	0	0	0	0	0	0	3	0	0	0	0	0	0	0	0	0	0	0	0	0	0	0	0	0	0	0	0	0	0	0
DJC	19	0	0	0	0	0	0	0	0	0	0	0	0	0	0	0	0	0	0	0	0	0	0	0	0	0	0	0	0	0	0	0	0	0	0	0	0	0	0	0	0	0	0	0	0	0	0	0	0
DJC	1	0	0	2	0	0	0	0	0	0	0	0	0	0	0	0	0	0	0	0	0	0	0	0	0	0	0	0	0	0	0	0	0	0	0	0	0	0	0	0	0	0	0	0	0	0	0	0	0
DJC	20	0	0	0	0	0	0	0	0	0	0	0	0	0	0	0	0	0	0	0	0	0	0	0	0	0	0	0	0	0	0	0	0	0	0	0	0	0	0	0	0	0	0	0	0	0	0	0	0
DJC	22	0	0	0	0	0	0	0	0	0	0	0	0	0	0	0	0	0	0	0	0	0	0	0	0	0	0	0	0	0	0	0	0	0	0	0	0	0	0	0	0	0	0	0	0	0	0	0	0
DJC	25	0	0	0	0	0	0	0	0	0	0	0	0	0	0	0	0	0	0	0	0	0	0	0	0	0	0	0	0	0	0	0	0	0	0	0	0	0	0	0	0	1	0	0	0	0	0	0	1
DJC	27	0	0	0	0	0	0	0	0	0	0	0	0	0	0	0	0	0	0	0	0	0	0	0	0	0	0	0	0	0	0	0	0	0	0	0	0	0	1	0	0	1	0	0	0	0	0	0	2
DJC	29	0	0	0	0	0	0	0	0	0	0	0	0	0	0	0	0	0	0	0	0	0	0	0	0	0	0	0	0	0	0	0	0	0	0	0	0	0	0	0	0	0	0	0	0	0	0	0	0
DJC	2	0	0	2	0	0	0	0	0	0	0	0	0	0	0	0	0	0	0	0	0	0	0	0	0	0	0	0	0	0	0	0	0	0	0	0	0	0	0	0	1	0	0	0	0	0	0	0	0
DJC	30	2	0	0	0	0	0	0	0	0	0	0	0	0	0	0	0	0	0	0	0	0	0	0	3	0	0	0	0	0	0	0	0	0	0	0	0	0	0	0	0	0	0	0	0	0	0	0	0
DJC	31	0	0	0	0	0	0	0	0	0	0	0	0	0	0	0	0	0	0	0	0	0	0	0	0	0	0	0	0	0	0	0	0	0	0	0	0	0	0	0	0	0	0	0	0	0	0	0	0
DJC	32	1	0	0	0	0	0	0	0	0	0	0	0	0	1	0	1	0	0	0	0	0	0	0	0	0	0	0	1	0	0	0	0	0	0	0	0	0	0	0	0	0	0	1	0	0	0	1	0
DJC	34	0	0	0	0	0	0	0	0	0	0	0	0	0	0	0	0	0	0	0	0	0	0	0	0	0	0	0	0	0	0	0	0	0	0	0	0	0	0	0	0	0	0	0	0	0	0	0	0
DJC	36	0	0	0	0	0	0	0	0	0	0	0	0	0	0	0	0	0	0	0	0	0	0	0	0	0	0	0	0	0	0	0	0	0	0	0	0	0	0	0	0	0	0	0	0	0	0	0	0
DJC	37	0	0	0	0	0	0	0	0	0	0	0	0	0	0	0	0	0	0	0	0	0	0	0	0	0	0	0	0	0	0	0	0	0	0	0	0	0	0	0	0	0	0	0	0	0	0	0	0
DJC	38	0	0	0	0	0	0	0	0	0	0	0	0	0	0	0	0	0	0	0	0	0	0	0	0	0	0	0	0	0	0	0	0	0	0	0	0	0	0	0	0	0	0	0	0	0	0	0	0
DJC	3	0	0	0	0	0	0	0	0	0	0	0	0	0	0	0	0	0	3	0	0	0	0	0	0	0	0	0	0	0	0	0	0	0	0	0	0	0	0	0	0	0	0	0	0	0	0	0	0
UC	42	1	0	0	0	0	0	0	0	1	0	0	0	0	0	0	0	0	0	0	0	0	0	0	0	0	0	0	0	0	0	0	0	0	0	1	0	0	0	0	0	0	0	0	0	0	0	0	0
UC	43	1	0	0	0	0	0	0	0	0	0	0	0	0	0	0	0	0	0	0	0	0	0	0	0	0	0	0	0	0	0	0	0	0	0	0	0	0	0	0	0	0	0	0	0	0	0	0	0
DJC	46	3	0	0	0	0	0	0	3	0	0	0	3	0	0	0	0	0	0	0	0	0	0	0	0	0	0	0	0	0	0	0	0	0	0	0	0	0	0	0	0	0	0	0	0	0	0	0	0
UC	47	0	0	0	0	0	0	0	0	0	0	0	0	0	0	0	0	0	0	0	0	0	0	0	0	0	0	0	0	0	0	0	0	0	0	0	0	0	0	0	0	0	0	0	0	0	0	0	0
UC	48	0	0	0	0	0	0	0	0	0	0	0	0	0	0	0	0	0	0	0	0	0	0	0	0	0	0	0	0	0	0	0	0	0	0	0	0	0	0	0	0	0	0	0	0	0	0	0	0
UC	49	0	0	0	0	0	0	0	0	0	0	0	0	0	0	0	0	0	0	0	0	0	0	0	0	0	0	0	0	0	2	0	0	0	0	0	0	0	0	0	0	0	0	0	0	0	0	0	0
DJC	4	0	0	0	0	0	0	0	0	0	0	0	0	0	0	0	0	0	0	0	0	0	0	0	0	0	0	0	0	0	0	0	0	0	0	0	0	0	0	0	0	0	0	0	0	0	0	0	0
UC	50	0	0	0	0	0	0	0	0	0	0	0	0	0	0	0	0	0	0	0	0	0	0	0	0	0	0	0	0	0	0	0	0	0	0	0	0	0	0	0	0	0	0	0	0	0	0	0	0
DJC	51	0	0	0	0	0	0	0	0	0	0	0	0	0	0	0	0	3	0	0	0	0	0	0	0	0	0	0	1	0	0	0	0	0	0	0	0	0	0	0	0	0	0	0	0	0	0	0	0
DJC	52	0	0	0	0	0	0	0	0	0	0	0	2	0	0	0	0	0	0	0	0	0	0	0	0	0	0	0	3	0	0	0	0	0	0	0	0	0	0	0	0	0	0	0	0	3	0	0	0
UC	53	0	0	0	0	0	0	0	0	0	0	0	0	0	0	0	0	0	0	0	0	0	0	0	0	0	0	0	0	0	0	0	0	0	0	0	0	0	0	0	0	0	0	0	0	0	0	0	0
UC	57	0	0	0	0	0	0	0	0	0	0	0	0	0	0	0	0	0	0	0	0	0	0	0	0	0	0	0	0	0	0	0	0	0	0	0	0	0	0	0	0	0	0	0	0	0	0	0	0
UC	58	0	0	0	0	0	0	0	0	0	0	0	0	0	0	0	0	0	0	0	0	0	0	0	0	0	0	0	0	0	0	0	0	0	0	0	0	0	0	0	0	0	0	0	0	0	0	0	0
UC	59	0	0	0	0	0	0	0	0	0	0	0	0	0	0	0	0	0	0	0	0	0	0	0	0	0	0	0	2	0	0	0	0	0	0	0	0	0	0	0	0	0	0	0	0	0	0	0	0
DJC	5	0	0	0	0	0	0	0	0	0	0	0	0	0	0	0	0	0	0	0	0	0	0	0	0	0	0	0	0	0	0	0	0	0	0	0	0	0	0	0	1	0	0	0	0	0	0	0	0
UC	60	0	0	0	0	0	0	0	0	0	0	0	0	0	0	0	0	0	0	0	0	0	0	0	0	0	0	0	0	0	0	0	0	0	0	0	0	0	0	0	0	0	0	0	0	0	0	0	0
UC	63	2	0	0	0	0	0	0	0	0	0	0	0	0	0	0	0	0	0	0	0	0	0	0	0	0	0	0	2	0	0	0	0	0	0	0	0	0	0	0	0	0	0	0	0	0	0	0	0
UC	64	0	0	0	0	0	0	0	0	0	0	0	0	0	0	0	0	0	0	0	0	0	0	0	0	0	0	0	0	0	0	0	0	0	0	0	0	0	0	0	0	0	0	0	0	0	0	0	0
UC	65	0	0	0	0	0	0	0	0	0	2	0	0	0	0	0	0	0	0	0	0	0	0	0	0	0	0	0	0	0	0	0	0	0	0	0	0	0	0	0	0	0	0	0	0	0	0	0	0
UC	66	0	0	0	0	0	0	0	0	0	0	0	0	0	0	0	0	0	0	0	0	0	0	0	0	0	0	0	0	0	0	0	0	0	0	0	0	0	0	0	0	0	0	0	0	0	0	0	0
UC	68	2	0	0	0	0	0	0	0	0	0	0	0	0	0	0	0	0	0	0	0	0	0	0	0	0	0	0	2	0	0	0	0	0	0	0	0	0	0	0	0	0	0	0	0	0	0	0	0
UC	69	1	0	0	0	0	0	0	0	0	0	0	0	0	0	0	0	0	0	0	0	0	0	0	0	0	0	0	0	0	0	0	0	1	0	0	0	0	0	0	0	0	0	0	0	0	0	0	0
DJC	6	0	0	0	0	0	0	0	0	0	0	0	0	0	0	0	0	0	0	0	0	0	0	0	0	0	0	0	0	0	0	0	0	0	0	0	0	0	0	0	1	0	1	0	0	1	0	0	0
DJC	70	0	0	0	0	0	0	0	0	0	0	0	0	0	0	0	0	0	0	0	0	0	0	0	0	0	0	0	0	0	0	0	0	0	0	0	0	0	0	0	0	0	0	0	0	0	0	0	0
UC	71	0	0	0	0	0	0	0	0	0	0	0	0	0	0	0	0	0	0	0	0	1	0	0	0	0	0	0	0	0	0	0	0	0	0	0	0	0	0	0	0	0	0	0	0	0	0	0	0
UC	72	0	0	0	0	0	0	0	0	0	0	0	0	0	0	0	0	0	0	0	0	0	0	0	0	0	0	0	0	0	0	0	0	0	0	0	0	0	0	0	0	0	0	0	0	0	0	0	0
UC	73	2	0	0	0	0	0	0	0	0	0	0	0	0	0	0	0	0	0	0	0	0	0	0	0	0	0	0	0	0	0	0	0	0	0	0	0	0	0	0	0	0	0	0	0	0	2	0	0
UC	74	0	0	0	0	0	0	0	0	0	0	0	0	0	0	0	0	0	0	0	0	0	0	0	0	0	0	0	2	0	0	0	0	0	0	0	0	0	0	0	0	0	0	0	0	0	0	0	0
UC	76	0	0	0	0	0	0	0	0	0	0	0	0	0	0	0	0	0	0	0	0	0	0	0	0	0	0	0	0	0	0	0	0	0	0	0	0	0	0	0	0	0	0	0	0	0	0	0	0
UC	77	1	0	0	0	0	0	0	0	0	0	0	0	0	0	0	0	0	0	0	0	0	0	0	0	0	0	0	0	0	0	0	0	0	0	0	0	0	0	0	0	0	0	0	0	0	0	0	0
DJC	7	0	0	0	0	0	0	0	0	0	0	0	0	0	0	0	0	0	0	0	0	0	0	0	0	0	0	0	0	0	0	0	0	0	0	0	0	0	0	0	0	0	0	0	0	0	0	0	0
UC	80	1	0	0	0	0	0	0	0	0	0	0	0	0	0	0	0	0	0	0	0	0	0	0	0	0	0	0	0	0	0	0	0	0	0	0	0	0	0	0	0	0	0	0	0	0	0	0	0
UC	81	0	0	0	0	0	0	0	0	0	0	0	0	0	0	0	0	0	0	0	0	0	0	0	0	0	0	0	0	0	0	0	0	0	0	0	0	0	0	0	0	0	0	0	0	0	0	0	0
DJC	82	0	0	0	0	0	0	0	0	0	0	0	0	0	0	0	0	0	0	0	0	0	0	0	0	0	0	0	0	0	0	0	0	0	2	0	0	0	0	0	0	0	0	0	0	0	0	0	1
UC	83	2	0	0	0	0	0	0	0	0	2	0	0	0	0	0	0	0	0	0	0	0	0	0	0	0	0	0	0	0	2	0	0	0	0	0	0	0	0	0	0	0	0	0	0	0	0	0	0
UC	84	0	0	0	0	0	0	0	0	0	1	0	0	1	0	0	0	0	0	0	0	0	0	0	0	0	0	0	0	0	0	0	0	0	0	0	0	0	0	0	0	0	0	0	0	0	0	0	0
UC	91	2	0	0	0	0	0	0	0	0	0	0	0	0	0	0	0	0	0	0	0	0	0	0	0	0	0	0	0	0	0	0	0	0	0	0	0	0	0	0	0	0	0	0	0	0	0	0	0
UC	92	0	0	0	0	0	0	0	0	0	0	0	0	0	0	0	0	0	0	0	0	0	0	0	0	0	0	0	0	0	0	0	0	0	0	0	0	0	0	0	0	0	0	0	0	0	0	0	0
DJC	95	0	0	0	0	0	0	0	0	0	0	0	0	0	0	0	0	0	0	0	0	0	0	0	0	0	0	0	0	0	0	0	0	0	0	0	0	0	0	0	0	0	0	0	0	0	0	0	0
UC	96	0	0	0	0	0	0	0	0	0	0	2	0	0	0	0	0	0	0	0	0	0	0	0	0	0	0	0	0	0	0	0	0	0	0	0	0	0	0	0	0	0	0	0	0	0	0	0	0
UC	97	1	0	0	0	0	0	0	0	0	0	0	0	0	0	0	0	0	0	0	0	0	0	0	0	0	0	0	0	0	0	0	0	0	0	0	0	0	0	0	0	0	0	0	0	0	0	0	0
UC	99	0	0	0	0	0	0	0	0	0	0	0	0	0	0	0	0	0	0	0	0	0	0	0	0	0	0	0	0	0	0	0	0	0	0	0	0	0	0	0	0	0	0	0	0	0	0	0	0
Actinotignum schaalii is in orange
[truncated: 95 more columns]

## Sheet: Table S4
Table S4: NGS metadata
Sample ID	Patient nr.	Type of catheter	Material	Sex	Age	A. schaalii presence	Hydronephrosis	Prostate cancer	Malignancy
1	112	UC	Sonication fluid	M	72	NO	NO	NO	NO
2	99	UC	Sonication fluid	M	69	NO	NO	YES	YES
3	77	UC	Urine	M	76	NO	NO	NO	YES
4	12	DJC	Sonication fluid, proximal tip	M	85	NO	YES	YES	YES
5	50	UC	Sonication fluid	M	68	NO	NO	NO	NO
6	53	UC	Sonication fluid	M	72	NO	NO	NO	NO
7	171	UC	Sonication fluid	M	69	YES	NO	YES	YES
8	183	DJC	Urine	M	81	NO	YES	NO	NO
9	177	DJC	Urine	F	57	YES	YES	NO	YES
10	178	UC	Sonication fluid	M	58	YES	YES	NO	NO
11	43	UC	Sonication fluid	M	75	YES	NO	NO	NO
12	62	UC	Urine	M	62	NO	NO	YES	YES
13	65	UC	Urine	M	76	YES	NO	NO	NO
14	66	UC	Sonication fluid	M	83	NO	NO	NO	NO
15	67	UC	Sonication fluid	M	82	YES	NO	NO	NO
16	74	UC	Sonication fluid	M	89	NO	NO	NO	NO
17	80	UC	Urine	M	72	NO	NO	NO	NO
18	99	DJC	Urine	M	72	NO	NO	YES	YES
19	103	UC	Sonication fluid	M	75	YES	NO	NO	NO
20	108	UC	Sonication fluid	M	84	NO	NO	YES	YES
21	108	UC	Urine	M	84	NO	NO	YES	YES
22	117	UC	Urine	M	84	YES	NO	YES	YES
23	125	UC	Urine	M	58	YES	YES	NO	NO
24	151	UC	Sonication fluid	M	84	YES	NO	YES	YES
25	159	UC	Sonication fluid	M	71	YES	NO	NO	NO
26	98	DJC	Urine	M	69	YES	NO	YES	YES
27	160	UC	Sonication fluid	M	84	YES	NO	YES	YES
28	162	DJC	Sonication fluid, distal tip	F	83	YES	YES	NO	NO
29	80	UC	Sonication fluid	M	72	NO	NO	NO	NO

## Sheet: Table S5
Table S5: Original species sample matrix
Taxonomic rank	Taxa	1	2	3	4	5	6	7	8	9	10	11	12	13	14	15	16	17	18	19	20	21	22	23	24	25	26	27	28	29	30
species	Acinetobacter_Other	0	0	0	0	0	0	0	0	0	0	0	0	0	0	4	0	0	0	0	0	0	0	0	0	0	0	0	0	0	0
species	Acinetobacter_uncultured bacterium	0	0	0	0	0	0	0	0	0	0	0	0	0	0	4	0	0	0	0	0	0	0	0	0	0	0	0	0	0	0
species	Actinomyces_Other	0	0	0	0	0	0	0	248	0	0	0	0	0	0	2	0	0	0	0	0	0	0	0	0	0	0	0	0	0	0
species	Actinomyces_uncultured bacterium	0	0	0	0	0	0	0	51	0	0	0	0	0	0	0	0	0	0	0	0	0	0	0	0	0	0	0	0	0	0
species	Actinotignum_Actinotignum schaalii	0	0	0	0	0	1	269	0	1006	13	804	0	43	1	276	0	0	0	0	0	0	13	3	14	18	10	24	32	0	0
species	Actinotignum_Other	0	0	0	0	0	0	583	0	0	0	0	0	23	0	0	0	0	0	0	0	0	0	0	0	0	0	0	0	0	0
species	Aerococcus_Other	0	0	0	0	0	0	2094	0	90	97	0	0	829	0	121	0	0	0	0	0	0	0	0	0	0	0	0	0	0	0
species	Aerococcus_uncultured bacterium	0	0	0	0	0	0	0	0	37	20	0	0	0	0	0	0	0	0	0	0	0	0	4	0	0	0	0	0	0	0
species	Alcaligenes_Other	0	0	0	0	0	1	0	0	0	0	0	0	0	403	1	0	0	0	0	0	0	0	0	0	0	0	0	0	0	0
species	Alcaligenes_uncultured bacterium	0	0	0	0	0	0	0	0	0	0	0	0	0	0	0	0	0	0	0	19	1	0	0	0	0	0	2	0	0	0
species	Anaerococcus_Other	0	0	80	0	20	0	0	0	0	0	0	0	0	0	0	0	0	0	0	0	0	0	0	0	0	0	0	0	0	0
species	Anaerococcus_uncultured bacterium	0	0	1	0	12	0	0	0	1	0	0	0	8	5	644	4	59	0	0	6	32	8	0	1	9	0	12	8	3	2
species	Arcanobacterium_Other	0	0	0	0	3	0	0	0	0	0	0	0	0	0	0	0	0	0	0	0	0	0	0	0	0	0	0	0	0	0
species	Atopobium_Other	0	0	0	0	1	0	0	0	0	0	2	0	0	0	0	0	0	0	0	0	0	0	0	0	0	0	0	0	0	0
species	Atopostipes_uncultured bacterium	0	0	0	0	0	0	0	0	0	0	0	0	0	954	1	0	0	0	0	0	0	0	0	0	0	0	0	0	0	0
species	Bacteroides_Other	0	0	0	0	0	0	0	0	0	0	3	0	0	0	0	0	0	0	0	0	0	0	0	0	0	0	0	0	0	0
species	Bacteroides_uncultured bacterium	0	0	0	0	0	0	0	0	0	0	36	0	0	0	0	0	0	0	0	0	0	0	0	0	0	0	0	0	0	0
species	Bacteroides_uncultured organism	0	0	0	0	0	0	0	0	0	0	1150	0	0	0	0	0	0	0	0	0	0	0	0	0	0	0	0	0	0	0
species	Bergeyella_uncultured bacterium	0	0	0	0	0	0	0	0	129	0	0	0	0	0	0	0	0	0	0	0	0	0	0	0	0	0	0	0	0	0
species	Bifidobacterium_Bifidobacterium breve	0	0	0	0	0	0	0	0	0	0	148	0	0	0	0	0	0	0	0	0	0	0	0	0	0	0	0	0	0	0
species	Bifidobacterium_uncultured bacterium	0	0	0	0	0	0	0	1	0	1	0	0	0	1	1	0	0	0	0	0	0	0	0	0	0	0	0	0	0	0
species	Campylobacter_Campylobacter ureolyticus	0	0	0	0	0	0	0	1	0	0	308	0	0	0	7	5150	174	0	0	0	0	10	0	0	6	0	18	2	72	34
species	Campylobacter_Other	0	0	0	0	6	0	0	0	0	0	1	0	0	0	0	0	0	0	0	0	0	0	0	0	0	0	0	0	0	0
species	Corynebacterium 1_Other	0	0	0	0	0	0	0	0	32	0	0	0	0	87	1	0	0	0	0	0	0	0	0	0	0	0	0	0	0	0
species	Corynebacterium 1_uncultured bacterium	0	0	0	0	0	0	0	0	2	0	0	0	0	6	0	0	0	0	0	0	0	0	0	0	4	0	0	0	0	0
species	Cronobacter_Other	12	0	0	0	0	0	0	0	3	0	0	0	0	0	0	0	0	0	0	0	0	0	0	0	0	0	0	0	0	0
species	Cronobacter_uncultured bacterium	4	0	0	0	0	0	0	0	0	0	0	0	0	0	0	0	0	0	0	0	0	0	0	0	0	0	0	0	0	0
species	Dialister_uncultured bacterium	0	0	0	0	3	0	0	0	0	0	0	0	0	0	0	0	0	0	0	0	0	0	0	0	0	0	0	0	0	0
species	Eikenella_uncultured bacterium	0	0	0	0	0	0	0	0	0	0	0	0	0	0	0	0	0	0	0	0	0	26	0	0	1	0	9	0	0	0
species	Enterobacter_Other	44	0	0	0	5	0	0	2220	9	2	0	5	0	0	0	208	0	0	0	0	0	0	0	0	0	0	0	0	0	0
species	Enterobacter_uncultured bacterium	53	11	0	0	0	11	0	734	15	0	1	9	0	0	0	20	0	2	17	0	0	0	1	0	0	3	0	0	4	1
species	Enterococcus_Enterococcus faecalis	629	617	623	4446	6336	51	225	0	3	1	542	50	89	0	10094	1884	327	1	73	29	50	1	24	0	34	1	9	8	7	1
species	Enterococcus_Other	22	34	31	215	291	1	17	0	0	0	3	0	5	0	1011	210	0	0	0	0	0	0	0	0	0	0	0	0	0	0
species	Enterococcus_uncultured bacterium	3	6	1	5	6	1	1	0	0	0	1	0	1	0	38	6	1	0	0	1	0	0	0	0	0	0	0	0	0	0
species	Escherichia-Shigella_Other	0	171	0	0	0	192	0	0	2	2	5	51	2	0	0	45	0	0	0	0	0	0	0	0	0	0	0	0	0	0
species	Escherichia-Shigella_uncultured bacterium	2	5984	0	3	0	6579	3	18	81	68	189	2430	18	9	0	1377	42	18	1	7	11	0	2	0	1	18	0	0	23	10
species	Escherichia-Shigella_uncultured Enterobacteriaceae bacterium	0	9	0	0	0	3	0	0	0	0	0	0	0	0	0	0	4	0	0	0	0	0	1	0	0	0	0	0	2	0
species	Ezakiella_uncultured bacterium	0	0	0	0	45	0	0	0	0	0	3	0	0	0	0	0	0	0	0	0	0	0	0	0	0	0	0	52	0	0
species	Facklamia_Other	0	0	0	0	0	0	77	0	0	0	0	0	1	0	0	0	0	0	0	0	0	0	0	0	0	0	0	0	0	0
species	Fastidiosipila_uncultured bacterium	0	0	0	0	0	0	451	0	0	0	0	0	1195	0	89	0	10	0	0	4	16	3	0	2	3	0	6	0	1	0
species	Finegoldia_uncultured bacterium	0	0	0	7	2	0	0	0	0	0	0	0	0	0	11	0	0	0	0	0	0	0	0	0	0	0	0	0	0	0
species	Fusobacterium_Other	0	0	0	0	0	2	0	0	75	0	29	0	0	0	5	0	0	0	0	0	0	0	0	0	0	0	0	0	0	0
species	Fusobacterium_uncultured bacterium	0	0	0	0	0	0	0	0	7207	0	2645	0	0	0	1	0	0	0	0	0	0	32	0	0	0	0	5	1	0	0
species	Fusobacterium_uncultured organism	0	0	0	0	0	0	0	0	64	0	10	0	0	0	0	0	0	0	0	0	0	12	0	0	1	0	3	8	0	0
species	Howardella_uncultured bacterium	0	0	0	0	0	0	0	0	141	0	0	0	0	0	0	0	0	0	0	0	0	0	0	0	0	0	0	0	0	0
species	Klebsiella_Other	113	0	0	0	0	0	0	2	9	0	0	0	0	0	0	2	0	0	0	0	0	0	0	0	0	0	0	0	0	0
species	Klebsiella_uncultured bacterium	4042	0	0	0	0	0	0	4	731	0	0	0	0	0	1	0	0	0	0	0	0	0	0	0	0	0	0	0	0	0
species	Kluyvera_uncultured bacterium	0	0	0	0	0	0	0	0	0	0	0	0	0	0	0	0	0	0	3	0	0	0	0	0	0	0	0	0	0	0
species	Mobiluncus_Other	0	0	0	0	3	0	0	0	0	0	0	0	0	0	0	0	0	0	0	0	0	0	0	0	0	0	0	0	0	0
species	Morganella_uncultured bacterium	0	0	0	0	0	0	0	0	2	0	1075	0	84	1	0	0	0	0	0	0	0	16	14	5	31	0	88	0	0	0
species	Morganella_uncultured organism	0	0	0	0	0	0	0	0	0	0	8	0	8	0	0	0	0	0	0	0	0	0	0	0	0	0	0	0	0	0
species	Negativicoccus_uncultured bacterium	0	0	0	0	0	0	0	0	0	0	0	0	0	0	6	0	0	0	0	0	0	0	0	0	0	0	0	0	0	0
species	Neisseria_uncultured bacterium	0	0	0	0	0	0	0	0	0	0	0	0	0	0	0	0	0	0	0	0	0	21	0	0	0	0	6	0	0	0
species	Oligella_uncultured bacterium	0	0	0	0	0	0	0	0	0	0	0	0	0	11	0	0	0	0	0	0	0	0	0	0	0	0	0	0	0	0
species	Paenalcaligenes_Other	0	0	0	0	0	0	0	0	0	0	0	0	0	66	0	0	0	0	0	0	0	0	0	0	0	0	0	0	0	0
species	Parvimonas_uncultured bacterium	0	0	0	0	2	0	0	0	175	0	564	0	0	2	0	0	4	0	0	0	0	2	0	0	5	0	5	0	0	0
species	Peptococcus_uncultured bacterium	0	0	0	0	0	0	0	0	0	0	0	0	0	0	0	0	0	0	0	0	0	0	0	0	0	0	0	5	0	0
species	Peptoniphilus_Other	0	0	0	0	6	0	0	0	0	0	0	0	0	0	2	2	0	0	0	0	0	0	0	0	0	0	0	0	0	0
species	Peptoniphilus_uncultured bacterium	0	0	0	0	12	0	0	1	3	0	174	0	0	1	17	929	31	0	0	0	0	4	0	0	5	0	21	222	1	1
species	Peptostreptococcus_uncultured bacterium	0	0	0	0	0	0	0	0	0	0	36	0	0	0	0	0	0	0	0	0	0	0	0	0	0	0	0	0	0	0
species	Planomicrobium_uncultured bacterium	0	0	0	0	4	0	0	0	0	0	0	0	1	0	0	0	7	0	4	0	1	0	1	0	0	0	0	0	0	0
species	Porphyromonas_Other	0	0	0	0	13	0	0	0	0	0	21	0	0	0	0	0	0	0	0	0	0	0	0	0	0	0	0	0	0	0
species	Porphyromonas_uncultured bacterium	0	0	0	0	0	0	0	0	0	0	0	0	0	2	1	0	0	0	0	0	0	36	0	0	6	0	7	10	0	0
species	Prevotella 6_uncultured bacterium	0	0	0	0	7	0	0	0	0	0	2	0	0	0	0	0	0	0	0	0	0	0	0	0	0	0	0	0	0	0
species	Prevotella_Other	0	0	0	0	28	0	0	0	0	0	5	0	0	0	2	0	0	0	0	0	0	0	0	0	0	0	0	0	0	0
species	Prevotella_Prevotella bivia	0	0	0	0	0	0	0	0	8	0	1	0	0	0	0	0	0	0	0	0	0	0	0	0	0	0	0	0	0	0
species	Propionimicrobium_Other	0	0	0	0	0	0	6	0	1	0	423	0	0	0	0	3374	0	0	0	0	0	0	0	0	0	0	0	0	0	0
species	Proteus_Other	0	0	5263	1	0	0	3	0	33	0	1328	0	92	292	2	572	0	0	0	0	0	0	0	0	0	0	0	0	0	0
species	Proteus_Proteus mirabilis	0	0	27	0	0	0	42	0	0	0	6	0	1	6126	5	11	6	0	0	3	1	0	1	0	0	0	1	0	6	1
species	Proteus_uncultured bacterium	0	0	0	0	0	0	0	0	0	0	0	0	0	0	0		98	0	0	12	20	0	76	2	3	0	8	0	36	22
species	Providencia_Other	0	0	0	0	0	0	0	0	0	0	581	0	0	0	0	3752	0	0	0	0	0	0	0	0	0	0	0	0	0	0
species	Providencia_Providencia stuartii ATCC 25827	0	0	0	0	0	0	0	0	0	0	6	0	0	1	2	5	0	0	0	0	0	0	0	0	0	0	0	0	2	0
species	Providencia_uncultured bacterium	0	0	0	0	0	0	0	0	0	0	0	0	0	0	0	7	0	0	0	0	0	0	0	0	0	0	0	0	0	0
species	Pseudomonas_Other	0	0	0	0	0	0	0	4	0	0	3	0	0	0	186	0	0	0	0	0	0	0	0	0	0	0	0	0	0	0
species	Pseudomonas_Pseudomonas aeruginosa	0	0	0	0	0	0	0	4	0	0	1	0	0	0	1720	0	0	0	0	36	5	0	0	0	0	0	0	0	0	0
species	Pseudomonas_Pseudomonas otitidis	0	0	0	0	0	0	0	0	0	0	0	0	0	0	3	0	0	0	0	0	0	0	0	0	0	0	0	0	0	0
species	Pseudomonas_uncultured bacterium	0	0	0	0	0	0	0	0	0	0	0	0	0	0	16	0	0	0	0	0	0	0	0	0	0	0	0	0	0	0
species	Sneathia_uncultured bacterium	0	0	0	0	0	0	0	0	0	0	0	0	0	0	0	0	0	0	0	0	0	0	0	0	0	0	0	6	0	0
species	Staphylococcus_Other	0	0	0	20	0	0	0	0	0	0	0	0	0	0	0	0	0	0	0	0	0	0	0	0	0	0	0	0	0	0
species	Staphylococcus_Staphylococcus aureus	0	0	0	55	0	0	0	0	0	0	0	0	0	0	0	0	0	0	0	0	0	0	0	0	0	0	0	0	0	0
species	Staphylococcus_Staphylococcus epidermidis	0	0	0	3	0	0	0	0	0	0	0	0	0	0	1	0	0	0	0	0	0	0	0	0	0	0	0	0	0	0
species	Staphylococcus_uncultured bacterium	0	0	0	11276	9	0	0	0	2	0	1	0	0	2	307	26	0	0	0	11	18	0	0	0	0	0	0	0	0	0
species	Staphylococcus_uncultured Staphylococcus sp.	0	0	0	1	0	0	0	0	0	0	0	0	0	0	1	0	0	0	0	0	0	0	0	0	0	0	0	0	0	0
species	Streptococcus_Other	0	0	0	0	0	0	0	0	17	0	0	0	0	0	0	2	0	0	0	0	0	0	0	0	0	0	0	0	0	0
species	Streptococcus_Streptococcus anginosus	0	0	0	0	0	0	0	0	49	0	0	0	0	0	0	9	0	0	0	0	1	0	0	0	0	0	0	0	0	0
species	Streptococcus_uncultured bacterium	0	0	0	0	0	0	0	0	2587	0	254	0	0	0	0	1165	0	0	0	0	0	0	0	0	0	0	0	0	0	0
species	Sutterella_uncultured organism	0	0	0	0	1	0	0	0	0	0	2	0	0	0	0	0	0	0	0	0	0	0	0	0	0	0	0	0	0	0
species	Varibaculum_uncultured bacterium	0	0	0	0	0	0	0	0	0	0	1	0	0	0	4	0	0	0	0	0	0	0	0	0	0	0	0	0	0	0
species	Veillonella_Other	0	0	0	0	0	0	0	0	6	0	0	0	0	0	0	0	0	0	0	0	0	0	0	0	0	0	0	0	0	0
species	Veillonella_uncultured bacterium	0	0	0	0	0	0	1	0	576	53	1555	0	0	2	0	0	0	0	0	0	0	0	0	0	0	0	0	0	0	0
species	Veillonella_uncultured organism	0	0	0	0	0	0	0	0	1	0	5	0	0	0	0	0	0	0	0	0	0	0	8	0	1	7	3	0	0	0
species	Bacillales_Other	1	4	3	4	33	0	0	0	0	0	0	0	0	0	13	1	0	0	0	0	0	0	0	0	0	0	0	0	0	0
species	Enterococcaceae_Other	0	0	0	0	0	0	15	0	0	0	0	0	2	0	0	0	0	0	0	0	0	0	0	0	0	0	0	0	0	0
species	Fusobacteriales_Other	0	0	0	0	0	0	0	0	15	0	7	0	0	0	0	0	0	0	0	0	0	0	0	0	0	0	0	0	0	0
species	Enterobacteriales_Other	104	3	79	0	0	2	0	139	46	1	10	9	1	4	0	15	0	0	0	0	0	0	0	0	0	0	0	0	0	0
species	Unclassified	0	0	0	0	0	0	0	0	0	0	13	0	0	0	3	0	263	95	305	230	195	303	38	28	63	68	112	18	210	99
species	Family XI_uncultured_uncultured bacterium	0	0	0	0	7	0	0	0	0	0	0	0	0	0	0	0	0	0	0	0	0	0	0	0	0	0	0	0	0	0
Taxonomic rank	Taxa	1	2	3	4	5	6	7	8	9	10	11	12	13	14	15	16	17	18	19	20	21	22	23	24	25	26	27	28	29	30
genus	Acinetobacter	0	0	0	0	0	0	0	0	0	0	0	0	0	0	8	0	0	0	0	0	0	0	0	0	0	0	0	0	0	0
genus	Actinomyces	0	0	0	0	0	0	0	299	0	0	0	0	0	0	2	0	0	0	0	2	17	0	0	0	0	0	0	0	0	0
genus	Actinotignum	0	0	0	0	0	1	852	0	1006	13	804	0	66	1	276	0	27	0	17	0	0	13	3	14	18	10	24	32	0	1
genus	Aerococcus	0	0	0	0	0	0	2094	0	127	117	0	0	829	0	121	0	0	0	0	0	0	0	5	0	0	8	0	0	0	0
genus	Alcaligenes	0	0	0	0	0	1	0	0	0	0	0	0	0	403	1	0	0	0	0	19	1	0	0	0	0	0	2	0	0	0
genus	Anaerococcus	0	0	81	0	32	0	0	0	1	0	0	0	8	5	644	4	59	0	0	6	32	8	0	1	9	0	12	10	3	2
genus	Arcanobacterium	0	0	0	0	3	0	0	0	0	0	0	0	0	0	0	0	0	0	0	0	0	0	0	0	0	0	0	0	0	0
genus	Atopobium	0	0	0	0	1	0	0	0	0	0	2	0	0	0	0	0	0	0	0	0	0	0	0	0	0	0	0	0	0	0
genus	Atopostipes	0	0	0	0	0	0	0	0	0	0	0	0	0	954	1	0	0	0	0	0	0	0	0	0	0	0	0	0	0	0
genus	Bacillales_Other	1	4	3	4	33	0	0	0	0	0	0	0	0	0	13	1	0	0	0	0	0	0	0	0	0	0	0	0	0	0
genus	Bacteroides	0	0	0	0	0	0	0	0	0	0	1189	0	0	0	0	0	0	0	0	0	0	0	0	0	0	0	0	0	0	0
genus	Bergeyella	0	0	0	0	0	0	0	0	129	0	0	0	0	0	0	0	0	0	0	0	0	0	0	0	0	0	0	0	0	0
genus	Bifidobacterium	0	0	0	0	0	0	0	1	0	1	148	0	0	1	1	0	0	0	0	0	0	0	0	0	0	0	0	0	0	0
genus	Campylobacter	0	0	0	0	6	0	0	1	0	0	309	0	0	0	7	5150	174	0	0	0	0	10	0	0	6	0	18	2	72	34
genus	Corynebacterium 1	0	0	0	0	0	0	0	0	34	0	0	0	0	93	1	0	0	0	0	0	0	0	0	0	4	0	0	0	0	0
genus	Cronobacter	16	0	0	0	0	0	0	0	3	0	0	0	0	0	0	0	0	0	0	0	1	2	0	0	0	0	0	0	0	0
genus	Dialister	0	0	0	0	3	0	0	0	0	0	0	0	0	0	0	0	0	0	0	0	0	0	0	0	0	0	0	0	0	0
genus	Eikenella	0	0	0	0	0	0	0	0	0	0	0	0	0	0	0	0	0	0	0	0	0	26	0	0	1	0	9	0	0	0
genus	Enterobacter	97	11	0	0	5	11	0	2954	24	2	1	14	0	0	0	228	2	2	23	6	5	0	1	0	0	3	1	0	5	2
genus	Enterobacteriaceae_Other	104	3	79	0	0	2	0	139	46	1	10	9	1	4	0	15	0	0	0	0	0	0	0	0	0	0	0	0	0	0
genus	Enterococcaceae_Other	0	0	0	0	0	0	15	0	0	0	0	0	2	0	0	0	0	0	0	0	0	0	0	0	0	0	0	0	0	0
genus	Enterococcus	654	657	655	4666	6633	53	243	0	3	1	546	50	95	0	11143	2100	332	1	74	30	51	1	24	0	36	1	9	8	8	1
genus	Escherichia-Shigella	2	6164	0	3	0	6774	3	18	83	70	194	2481	20	9	0	1422	217	113	2	7	11	1	30	1	6	78	4	0	149	55
genus	Ezakiella	0	0	0	0	45	0	0	0	0	0	3	0	0	0	0	0	0	0	0	0	0	0	0	0	0	0	0	52	0	0
genus	Facklamia	0	0	0	0	0	0	77	0	0	0	0	0	1	0	0	0	0	0	0	0	0	0	0	0	0	0	0	0	0	0
genus	Fastidiosipila	0	0	0	0	0	0	451	0	0	0	0	0	1195	0	89	0	10	0	0	4	16	3	0	2	3	0	6	0	1	0
genus	Finegoldia	0	0	0	7	2	0	0	0	0	0	0	0	0	0	11	0	0	0	0	0	0	0	0	0	0	0	0	0	0	0
genus	Fusobacteriales_Other	0	0	0	0	0	0	0	0	15	0	7	0	0	0	0	0	0	0	0	0	0	0	0	0	0	0	0	0	0	0
genus	Fusobacterium	0	0	0	0	0	2	0	0	7346	0	2684	0	0	0	6	0	0	0	0	0	0	332	0	0	19	0	35	9	0	0
genus	Howardella	0	0	0	0	0	0	0	0	141	0	0	0	0	0	0	0	0	0	0	0	0	0	0	0	0	0	0	0	0	0
genus	Klebsiella	4155	0	0	0	0	0	0	6	740	0	0	0	0	0	1	2	0	0	0	0	0	0	0	0	0	0	0	0	0	0
genus	Kluyvera	0	0	0	0	0	0	0	0	0	0	0	0	0	0	0	0	0	0	256	1	0	0	0	0	0	0	0	0	0	0
genus	Mobiluncus	0	0	0	0	3	0	0	0	0	0	0	0	0	0	0	0	0	0	0	0	0	0	0	0	0	0	0	0	0	0
genus	Morganella	0	0	0	0	0	0	0	0	2	0	1083	0	92	1	0	0	0	0	0	0	0	16	14	7	34	0	90	0	0	0
genus	Negativicoccus	0	0	0	0	0	0	0	0	0	0	0	0	0	0	6	0	0	0	0	0	0	0	0	0	0	0	0	0	0	0
genus	Neisseria	0	0	0	0	0	0	0	0	0	0	0	0	0	0	0	0	0	0	0	0	0	21	0	0	0	0	6	0	0	0
genus	Oligella	0	0	0	0	0	0	0	0	0	0	0	0	0	11	0	0	0	0	0	0	0	0	0	0	0	0	0	0	0	0
genus	Paenalcaligenes	0	0	0	0	0	0	0	0	0	0	0	0	0	66	0	0	0	0	0	0	0	0	0	0	0	0	0	0	0	0
genus	Parvimonas	0	0	0	0	2	0	0	0	175	0	564	0	0	2	0	0	4	0	0	0	0	2	0	0	5	0	5	0	0	0
genus	Peptococcus	0	0	0	0	0	0	0	0	0	0	0	0	0	0	0	0	0	0	0	0	0	0	0	0	0	0	0	5	0	0
genus	Peptoniphilus	0	0	0	0	18	0	0	1	3	0	174	0	0	1	19	931	31	0	0	0	0	4	0	0	5	0	21	231	1	1
genus	Peptostreptococcus	0	0	0	0	0	0	0	0	0	0	36	0	0	0	0	0	0	0	0	0	0	0	0	0	0	0	0	0	0	0
genus	Planomicrobium	0	0	0	0	4	0	0	0	0	0	0	0	1	0	0	0	7	0	4	0	1	0	1	0	0	0	0	0	0	0
genus	Porphyromonas	0	0	0	0	13	0	0	0	0	0	21	0	0	2	1	0	0	0	0	0	0	36	0	0	6	0	7	12	0	0
genus	Prevotella	0	0	0	0	28	0	0	0	8	0	6	0	0	0	2	0	0	0	0	0	0	0	0	0	0	0	0	0	0	0
genus	Prevotella 6	0	0	0	0	7	0	0	0	0	0	2	0	0	0	0	0	0	0	0	0	0	0	0	0	0	0	0	0	0	0
genus	Propionimicrobium	0	0	0	0	0	0	6	0	1	0	423	0	0	0	0	3374	0	0	0	0	0	3	2	0	0	0	8	0	0	0
genus	Proteus	0	0	5290	1	0	0	45	0	33	0	1334	0	93	6418	7	583	107	0	0	15	21	6	80	27	38	0	77	0	42	24
genus	Providencia	0	0	0	0	0	0	0	0	0	0	587	0	0	1	2	3764	55	0	0	106	27	0	0	0	0	0	0	0	84	50
genus	Pseudomonas	0	0	0	0	0	0	0	8	0	0	4	0	0	0	1925	0	0	0	0	111	14	0	0	0	0	0	0	0	0	0
genus	Sneathia	0	0	0	0	0	0	0	0	0	0	0	0	0	0	0	0	0	0	0	0	0	0	0	0	0	0	0	6	0	0
genus	Staphylococcus	0	0	0	11355	9	0	0	0	2	0	1	0	0	2	309	26	0	0	1	40	105	0	0	0	0	0	0	0	0	0
genus	Streptococcus	0	0	0	0	0	0	0	0	2653	0	254	0	0	0	0	1176	0	0	0	9	46	0	0	0	0	0	0	5	0	0
genus	Sutterella	0	0	0	0	1	0	0	0	0	0	2	0	0	0	0	0	0	0	0	0	0	0	0	0	0	0	0	0	0	0
genus	Unasigned_Other	0	0	0	0	0	0	0	0	0	0	13	0	0	0	3	0	1	0	26	2	3	3	5	0	0	0	2	0	2	1
genus	Family XI_uncultured	0	0	0	0	7	0	0	0	0	0	0	0	0	0	0	0	0	0	0	0	0	0	0	0	0	0	0	0	0	0
genus	Varibaculum	0	0	0	0	0	0	0	0	0	0	1	0	0	0	4	0	0	0	0	0	0	0	0	0	0	0	0	0	0	0
genus	Veillonella	0	0	0	0	0	0	1	0	583	53	1560	0	0	2	0	0	0	0	0	0	0	0	8	0	1	7	3	0	0	0
Taxonomic rank	Taxa	1	2	3	4	5	6	7	8	9	10	11	12	13	14	15	16	17	18	19	20	21	22	23	24	25	26	27	28	29	30
family	Actinomycetaceae	0	0	0	0	6	1	852	299	1006	13	805	0	66	1	282	0	27	0	17	2	17	13	3	14	18	10	24	32	0	1
family	Aerococcaceae	0	0	0	0	0	0	2171	0	127	117	0	0	830	0	121	0	0	0	0	0	0	0	5	0	0	8	0	0	0	0
family	Alcaligenaceae	0	0	0	0	1	1	0	0	0	0	2	0	0	480	1	0	0	0	0	19	1	0	0	0	0	0	2	0	0	0
family	Bacillales_Other	1	4	3	4	33	0	0	0	0	0	0	0	0	0	13	1	0	0	0	0	0	0	0	0	0	0	0	0	0	0
family	Bacteroidaceae	0	0	0	0	0	0	0	0	0	0	1189	0	0	0	0	0	0	0	0	0	0	0	0	0	0	0	0	0	0	0
family	Bifidobacteriaceae	0	0	0	0	0	0	0	1	0	1	148	0	0	1	1	0	0	0	0	0	0	0	0	0	0	0	0	0	0	0
family	Campylobacteraceae	0	0	0	0	6	0	0	1	0	0	309	0	0	0	7	5150	174	0	0	0	0	10	0	0	6	0	18	2	72	34
family	Carnobacteriaceae	0	0	0	0	0	0	0	0	0	0	0	0	0	954	1	0	0	0	0	0	0	0	0	0	0	0	0	0	0	0
family	Coriobacteriaceae	0	0	0	0	1	0	0	0	0	0	2	0	0	0	0	0	0	0	0	0	0	0	0	0	0	0	0	0	0	0
family	Corynebacteriaceae	0	0	0	0	0	0	0	0	34	0	0	0	0	93	1	0	0	0	0	0	0	0	0	0	4	0	0	0	0	0
family	Enterobacteriaceae	4374	6178	5369	4	5	6787	48	3117	931	73	3209	2504	206	6433	10	6014	382	115	307	137	68	28	130	35	78	81	174	0	282	132
family	Enterococcaceae	654	657	655	4666	6633	53	258	0	3	1	546	50	97	0	11143	2100	332	1	74	30	51	1	24	0	36	1	9	8	8	1
family	Family XI	0	0	81	7	106	0	0	1	179	0	741	0	8	8	674	935	94	0	0	6	32	14	0	1	19	0	38	293	4	3
family	Flavobacteriaceae	0	0	0	0	0	0	0	0	129	0	0	0	0	0	0	0	0	0	0	0	0	0	0	0	0	0	0	0	0	0
family	Fusobacteriaceae	0	0	0	0	0	2	0	0	7346	0	2684	0	0	0	6	0	0	0	0	0	0	332	0	0	19	0	35	9	0	0
family	Fusobacteriales_Other	0	0	0	0	0	0	0	0	15	0	7	0	0	0	0	0	0	0	0	0	0	0	0	0	0	0	0	0	0	0
family	Lachnospiraceae	0	0	0	0	0	0	0	0	141	0	0	0	0	0	0	0	0	0	0	0	0	0	0	0	0	0	0	0	0	0
family	Leptotrichiaceae	0	0	0	0	0	0	0	0	0	0	0	0	0	0	0	0	0	0	0	0	0	0	0	0	0	0	0	6	0	0
family	Moraxellaceae	0	0	0	0	0	0	0	0	0	0	0	0	0	0	8	0	0	0	0	0	0	0	0	0	0	0	0	0	0	0
family	Neisseriaceae	0	0	0	0	0	0	0	0	0	0	0	0	0	0	0	0	0	0	0	0	0	47	0	0	1	0	15	0	0	0
family	Peptococcaceae	0	0	0	0	0	0	0	0	0	0	0	0	0	0	0	0	0	0	0	0	0	0	0	0	0	0	0	5	0	0
family	Peptostreptococcaceae	0	0	0	0	0	0	0	0	0	0	36	0	0	0	0	0	0	0	0	0	0	0	0	0	0	0	0	0	0	0
family	Planococcaceae	0	0	0	0	4	0	0	0	0	0	0	0	1	0	0	0	7	0	4	0	1	0	1	0	0	0	0	0	0	0
family	Porphyromonadaceae	0	0	0	0	13	0	0	0	0	0	21	0	0	2	1	0	0	0	0	0	0	36	0	0	6	0	7	12	0	0
family	Prevotellaceae	0	0	0	0	35	0	0	0	8	0	8	0	0	0	2	0	0	0	0	0	0	0	0	0	0	0	0	0	0	0
family	Propionibacteriaceae	0	0	0	0	0	0	6	0	1	0	423	0	0	0	0	3374	0	0	0	0	0	3	2	0	0	0	8	0	0	0
family	Pseudomonadaceae	0	0	0	0	0	0	0	8	0	0	4	0	0	0	1925	0	0	0	0	111	14	0	0	0	0	0	0	0	0	0
family	Ruminococcaceae	0	0	0	0	0	0	451	0	0	0	0	0	1195	0	89	0	10	0	0	4	16	3	0	2	3	0	6	0	1	0
family	Staphylococcaceae	0	0	0	11355	9	0	0	0	2	0	1	0	0	2	309	26	0	0	1	40	105	0	0	0	0	0	0	0	0	0
family	Streptococcaceae	0	0	0	0	0	0	0	0	2653	0	254	0	0	0	0	1176	0	0	0	9	46	0	0	0	0	0	0	5	0	0
family	Unasigned_Other	0	0	0	0	0	0	0	0	0	0	13	0	0	0	3	0	0	0	0	0	0	0	0	0	0	0	0	0	0	0
family	Veillonellaceae	0	0	0	0	3	0	1	0	583	53	1560	0	0	2	6	0	0	0	0	0	0	0	8	0	1	7	3	0	0	0
Taxonomic rank	Taxa	1	2	3	4	5	6	7	8	9	10	11	12	13	14	15	16	17	18	19	20	21	22	23	24	25	26	27	28	29	30
order	Actinomycetales	0	0	0	0	6	1	852	299	1006	13	805	0	66	1	282	0	27	0	17	2	17	13	3	14	18	10	24	32	0	1
order	Bacillales	1	4	3	11359	46	0	0	0	2	0	1	0	1	2	322	27	7	0	5	40	106	0	1	0	0	0	0	0	0	0
order	Bacteroidales	0	0	0	0	48	0	0	0	8	0	1218	0	0	2	3	0	0	0	0	0	0	36	0	0	6	0	7	12	0	0
order	Bifidobacteriales	0	0	0	0	0	0	0	1	0	1	148	0	0	1	1	0	0	0	0	0	0	0	0	0	0	0	0	0	0	0
order	Burkholderiales	0	0	0	0	1	1	0	0	0	0	2	0	0	480	1	0	0	0	0	19	1	0	0	0	0	0	2	0	0	0
order	Campylobacterales	0	0	0	0	6	0	0	1	0	0	309	0	0	0	7	5150	174	0	0	0	0	10	0	0	6	0	18	2	72	34
order	Clostridiales	0	0	81	7	106	0	451	1	320	0	777	0	1203	8	763	935	104	0	0	10	48	17	0	3	22	0	44	298	5	3
order	Coriobacteriales	0	0	0	0	1	0	0	0	0	0	2	0	0	0	0	0	0	0	0	0	0	0	0	0	0	0	0	0	0	0
order	Corynebacteriales	0	0	0	0	0	0	0	0	34	0	0	0	0	93	1	0	0	0	0	0	0	0	0	0	4	0	0	0	0	0
order	Enterobacteriales	4374	6178	5369	4	5	6787	48	3117	931	73	3209	2504	206	6433	10	6014	382	115	307	137	68	28	130	35	78	81	174	0	282	132
order	Flavobacteriales	0	0	0	0	0	0	0	0	129	0	0	0	0	0	0	0	0	0	0	0	0	0	0	0	0	0	0	0	0	0
order	Fusobacteriales	0	0	0	0	0	2	0	0	7361	0	2691	0	0	0	6	0	0	0	0	0	0	332	0	0	19	0	35	15	0	0
order	Lactobacillales	654	657	655	4666	6633	53	2429	0	2783	118	800	50	927	954	11265	3276	332	1	74	39	97	1	29	0	36	9	9	13	8	1
order	Neisseriales	0	0	0	0	0	0	0	0	0	0	0	0	0	0	0	0	0	0	0	0	0	47	0	0	1	0	15	0	0	0
order	Unclassified	0	0	0	0	0	0	0	0	0	0	13	0	0	0	3	0	0	0	0	0	0	0	0	0	0	0	0	0	0	0
order	Propionibacteriales	0	0	0	0	0	0	6	0	1	0	423	0	0	0	0	3374	0	0	0	0	0	3	2	0	0	0	8	0	0	0
order	Pseudomonadales	0	0	0	0	0	0	0	8	0	0	4	0	0	0	1933	0	0	0	0	111	14	0	0	0	0	0	0	0	0	0
order	Selenomonadales	0	0	0	0	3	0	1	0	583	53	1560	0	0	2	6	0	0	0	0	0	0	0	8	0	1	7	3	0	0	0
Taxonomic rank	Taxa	1	2	3	4	5	6	7	8	9	10	11	12	13	14	15	16	17	18	19	20	21	22	23	24	25	26	27	28	29	30
class	Actinobacteria	0	0	0	0	6	1	858	300	1041	14	1376	0	66	95	284	3374	27	0	17	2	17	16	5	14	22	10	32	32	0	1
class	Bacilli	655	661	658	16025	6679	53	2429	0	2785	118	801	50	928	956	11587	3303	339	1	79	79	203	1	30	0	36	9	9	13	8	1
class	Bacteroidia	0	0	0	0	48	0	0	0	8	0	1218	0	0	2	3	0	0	0	0	0	0	36	0	0	6	0	7	12	0	0
class	Betaproteobacteria	0	0	0	0	1	1	0	0	0	0	2	0	0	480	1	0	0	0	0	19	1	47	0	0	1	0	17	0	0	0
class	Clostridia	0	0	81	7	106	0	451	1	320	0	777	0	1203	8	763	935	104	0	0	10	48	17	0	3	22	0	44	298	5	3
class	Coriobacteriia	0	0	0	0	1	0	0	0	0	0	2	0	0	0	0	0	0	0	0	0	0	0	0	0	0	0	0	0	0	0
class	Epsilonproteobacteria	0	0	0	0	6	0	0	1	0	0	309	0	0	0	7	5150	174	0	0	0	0	10	0	0	6	0	18	2	72	34
class	Flavobacteriia	0	0	0	0	0	0	0	0	129	0	0	0	0	0	0	0	0	0	0	0	0	0	0	0	0	0	0	0	0	0
class	Fusobacteria	0	0	0	0	0	2	0	0	7361	0	2691	0	0	0	6	0	0	0	0	0	0	332	0	0	19	0	35	15	0	0
class	Gammaproteobacteria	4374	6178	5369	4	5	6787	48	3125	931	73	3213	2504	206	6433	1943	6014	382	115	307	248	82	28	130	35	78	81	174	0	282	132
class	Negativicutes	0	0	0	0	3	0	1	0	583	53	1560	0	0	2	6	0	0	0	0	0	0	0	8	0	1	7	3	0	0	0
class	Unclassified_Other	0	0	0	0	0	0	0	0	0	0	13	0	0	0	3	0	0	0	0	0	0	0	0	0	0	0	0	0	0	0
Taxonomic rank	Taxa	1	2	3	4	5	6	7	8	9	10	11	12	13	14	15	16	17	18	19	20	21	22	23	24	25	26	27	28	29	30
phylum	Actinobacteria	0	0	0	0	7	1	858	300	1041	14	1378	0	66	95	284	3374	27	0	17	2	17	16	5	14	22	10	32	32	0	1
phylum	Bacteroidetes	0	0	0	0	48	0	0	0	137	0	1218	0	0	2	3	0	0	0	0	0	0	36	0	0	6	0	7	12	0	0
phylum	Firmicutes	655	661	739	16032	6788	53	2881	1	3688	171	3138	50	2131	966	12356	4238	443	1	79	89	251	18	38	3	59	16	56	311	13	4
phylum	Fusobacteria	0	0	0	0	0	2	0	0	7361	0	2691	0	0	0	6	0	0	0	0	0	0	332	0	0	19	0	35	15	0	0
phylum	Proteobacteria	4374	6178	5369	4	12	6788	48	3126	931	73	3524	2504	206	6913	1951	11164	556	115	307	267	83	85	130	35	85	81	209	2	354	166
phylum	Unassigned_Other	0	0	0	0	0	0	0	0	0	0	13	0	0	0	3	0	0	0	0	0	0	0	0	0	0	0	0	0	0	0
phylum	Unassigned_Other	0	0	0	0	0	0	0	0	0	0	13	0	0	0	3	0	0	0	0	0	0	0	0	0	0	0	0	0	0	0

## Sheet: Table S6
Table S6: Residual sample matrix
Taxonomic rank	Taxa	1	2	3	4	5	6	7	8	9	10	11	12	13	14	15	16	17	18	19	20	21	22	23	24	25	26	27	28	29	30
species	Acinetobacter_Other	0	0	0	0	0	0	0	0	0	0	0	0	0	0	4	0	0	0	0	0	0	0	0	0	0	0	0	0	0	0
species	Acinetobacter_uncultured bacterium	0	0	0	0	0	0	0	0	0	0	0	0	0	0	4	0	0	0	0	0	0	0	0	0	0	0	0	0	0	0
species	Actinomyces_Other	0	0	0	0	0	0	0	248	0	0	0	0	0	0	2	0	0	0	0	0	0	0	0	0	0	0	0	0	0	0
species	Actinomyces_uncultured bacterium	0	0	0	0	0	0	0	51	0	0	0	0	0	0	0	0	0	0	0	0	0	0	0	0	0	0	0	0	0	0
species	Aerococcus_Other	0	0	0	0	0	0	2094	0	90	97	0	0	829	0	121	0	0	0	0	0	0	0	0	0	0	0	0	0	0	0
species	Aerococcus_uncultured bacterium	0	0	0	0	0	0	0	0	37	20	0	0	0	0	0	0	0	0	0	0	0	0	4	0	0	0	0	0	0	0
species	Alcaligenes_Other	0	0	0	0	0	1	0	0	0	0	0	0	0	403	1	0	0	0	0	0	0	0	0	0	0	0	0	0	0	0
species	Alcaligenes_uncultured bacterium	0	0	0	0	0	0	0	0	0	0	0	0	0	0	0	0	0	0	0	19	1	0	0	0	0	0	2	0	0	0
species	Anaerococcus_Other	0	0	80	0	20	0	0	0	0	0	0	0	0	0	0	0	0	0	0	0	0	0	0	0	0	0	0	0	0	0
species	Anaerococcus_uncultured bacterium	0	0	1	0	12	0	0	0	1	0	0	0	8	5	644	4	59	0	0	6	32	8	0	1	9	0	12	8	3	2
species	Arcanobacterium_Other	0	0	0	0	3	0	0	0	0	0	0	0	0	0	0	0	0	0	0	0	0	0	0	0	0	0	0	0	0	0
species	Atopobium_Other	0	0	0	0	1	0	0	0	0	0	2	0	0	0	0	0	0	0	0	0	0	0	0	0	0	0	0	0	0	0
species	Atopostipes_uncultured bacterium	0	0	0	0	0	0	0	0	0	0	0	0	0	954	1	0	0	0	0	0	0	0	0	0	0	0	0	0	0	0
species	Bacteroides_Other	0	0	0	0	0	0	0	0	0	0	3	0	0	0	0	0	0	0	0	0	0	0	0	0	0	0	0	0	0	0
species	Bacteroides_uncultured bacterium	0	0	0	0	0	0	0	0	0	0	36	0	0	0	0	0	0	0	0	0	0	0	0	0	0	0	0	0	0	0
species	Bacteroides_uncultured organism	0	0	0	0	0	0	0	0	0	0	1150	0	0	0	0	0	0	0	0	0	0	0	0	0	0	0	0	0	0	0
species	Bergeyella_uncultured bacterium	0	0	0	0	0	0	0	0	129	0	0	0	0	0	0	0	0	0	0	0	0	0	0	0	0	0	0	0	0	0
species	Bifidobacterium_Bifidobacterium breve	0	0	0	0	0	0	0	0	0	0	148	0	0	0	0	0	0	0	0	0	0	0	0	0	0	0	0	0	0	0
species	Bifidobacterium_uncultured bacterium	0	0	0	0	0	0	0	1	0	1	0	0	0	1	1	0	0	0	0	0	0	0	0	0	0	0	0	0	0	0
species	Campylobacter_Campylobacter ureolyticus	0	0	0	0	0	0	0	1	0	0	308	0	0	0	7	5150	174	0	0	0	0	10	0	0	6	0	18	2	72	34
species	Campylobacter_Other	0	0	0	0	6	0	0	0	0	0	1	0	0	0	0	0	0	0	0	0	0	0	0	0	0	0	0	0	0	0
species	Corynebacterium 1_Other	0	0	0	0	0	0	0	0	32	0	0	0	0	87	1	0	0	0	0	0	0	0	0	0	0	0	0	0	0	0
species	Corynebacterium 1_uncultured bacterium	0	0	0	0	0	0	0	0	2	0	0	0	0	6	0	0	0	0	0	0	0	0	0	0	4	0	0	0	0	0
species	Cronobacter_Other	12	0	0	0	0	0	0	0	3	0	0	0	0	0	0	0	0	0	0	0	0	0	0	0	0	0	0	0	0	0
species	Cronobacter_uncultured bacterium	4	0	0	0	0	0	0	0	0	0	0	0	0	0	0	0	0	0	0	0	0	0	0	0	0	0	0	0	0	0
species	Dialister_uncultured bacterium	0	0	0	0	3	0	0	0	0	0	0	0	0	0	0	0	0	0	0	0	0	0	0	0	0	0	0	0	0	0
species	Eikenella_uncultured bacterium	0	0	0	0	0	0	0	0	0	0	0	0	0	0	0	0	0	0	0	0	0	26	0	0	1	0	9	0	0	0
species	Enterobacter_Other	44	0	0	0	5	0	0	2220	9	2	0	5	0	0	0	208	0	0	0	0	0	0	0	0	0	0	0	0	0	0
species	Enterobacter_uncultured bacterium	53	11	0	0	0	11	0	734	15	0	1	9	0	0	0	20	0	2	17	0	0	0	1	0	0	3	0	0	4	1
species	Enterococcus_Enterococcus faecalis	629	617	623	4446	6336	51	225	0	3	1	542	50	89	0	10094	1884	327	1	73	29	50	1	24	0	34	1	9	8	7	1
species	Enterococcus_Other	22	34	31	215	291	1	17	0	0	0	3	0	5	0	1011	210	0	0	0	0	0	0	0	0	0	0	0	0	0	0
species	Enterococcus_uncultured bacterium	3	6	1	5	6	1	1	0	0	0	1	0	1	0	38	6	1	0	0	1	0	0	0	0	0	0	0	0	0	0
species	Escherichia-Shigella_Other	0	171	0	0	0	192	0	0	2	2	5	51	2	0	0	45	0	0	0	0	0	0	0	0	0	0	0	0	0	0
species	Escherichia-Shigella_uncultured bacterium	2	5984	0	3	0	6579	3	18	81	68	189	2430	18	9	0	1377	42	18	1	7	11	0	2	0	1	18	0	0	23	10
species	Escherichia-Shigella_uncultured Enterobacteriaceae bacterium	0	9	0	0	0	3	0	0	0	0	0	0	0	0	0	0	4	0	0	0	0	0	1	0	0	0	0	0	2	0
species	Ezakiella_uncultured bacterium	0	0	0	0	45	0	0	0	0	0	3	0	0	0	0	0	0	0	0	0	0	0	0	0	0	0	0	52	0	0
species	Facklamia_Other	0	0	0	0	0	0	77	0	0	0	0	0	1	0	0	0	0	0	0	0	0	0	0	0	0	0	0	0	0	0
species	Fastidiosipila_uncultured bacterium	0	0	0	0	0	0	451	0	0	0	0	0	1195	0	89	0	10	0	0	4	16	3	0	2	3	0	6	0	1	0
species	Finegoldia_uncultured bacterium	0	0	0	7	2	0	0	0	0	0	0	0	0	0	11	0	0	0	0	0	0	0	0	0	0	0	0	0	0	0
species	Fusobacterium_Other	0	0	0	0	0	2	0	0	75	0	29	0	0	0	5	0	0	0	0	0	0	0	0	0	0	0	0	0	0	0
species	Fusobacterium_uncultured bacterium	0	0	0	0	0	0	0	0	7207	0	2645	0	0	0	1	0	0	0	0	0	0	32	0	0	0	0	5	1	0	0
species	Fusobacterium_uncultured organism	0	0	0	0	0	0	0	0	64	0	10	0	0	0	0	0	0	0	0	0	0	12	0	0	1	0	3	8	0	0
species	Howardella_uncultured bacterium	0	0	0	0	0	0	0	0	141	0	0	0	0	0	0	0	0	0	0	0	0	0	0	0	0	0	0	0	0	0
species	Klebsiella_Other	113	0	0	0	0	0	0	2	9	0	0	0	0	0	0	2	0	0	0	0	0	0	0	0	0	0	0	0	0	0
species	Klebsiella_uncultured bacterium	4042	0	0	0	0	0	0	4	731	0	0	0	0	0	1	0	0	0	0	0	0	0	0	0	0	0	0	0	0	0
species	Kluyvera_uncultured bacterium	0	0	0	0	0	0	0	0	0	0	0	0	0	0	0	0	0	0	3	0	0	0	0	0	0	0	0	0	0	0
species	Mobiluncus_Other	0	0	0	0	3	0	0	0	0	0	0	0	0	0	0	0	0	0	0	0	0	0	0	0	0	0	0	0	0	0
species	Morganella_uncultured bacterium	0	0	0	0	0	0	0	0	2	0	1075	0	84	1	0	0	0	0	0	0	0	16	14	5	31	0	88	0	0	0
species	Morganella_uncultured organism	0	0	0	0	0	0	0	0	0	0	8	0	8	0	0	0	0	0	0	0	0	0	0	0	0	0	0	0	0	0
species	Negativicoccus_uncultured bacterium	0	0	0	0	0	0	0	0	0	0	0	0	0	0	6	0	0	0	0	0	0	0	0	0	0	0	0	0	0	0
species	Neisseria_uncultured bacterium	0	0	0	0	0	0	0	0	0	0	0	0	0	0	0	0	0	0	0	0	0	21	0	0	0	0	6	0	0	0
species	Oligella_uncultured bacterium	0	0	0	0	0	0	0	0	0	0	0	0	0	11	0	0	0	0	0	0	0	0	0	0	0	0	0	0	0	0
species	Paenalcaligenes_Other	0	0	0	0	0	0	0	0	0	0	0	0	0	66	0	0	0	0	0	0	0	0	0	0	0	0	0	0	0	0
species	Parvimonas_uncultured bacterium	0	0	0	0	2	0	0	0	175	0	564	0	0	2	0	0	4	0	0	0	0	2	0	0	5	0	5	0	0	0
species	Peptococcus_uncultured bacterium	0	0	0	0	0	0	0	0	0	0	0	0	0	0	0	0	0	0	0	0	0	0	0	0	0	0	0	5	0	0
species	Peptoniphilus_Other	0	0	0	0	6	0	0	0	0	0	0	0	0	0	2	2	0	0	0	0	0	0	0	0	0	0	0	0	0	0
species	Peptoniphilus_uncultured bacterium	0	0	0	0	12	0	0	1	3	0	174	0	0	1	17	929	31	0	0	0	0	4	0	0	5	0	21	222	1	1
species	Peptostreptococcus_uncultured bacterium	0	0	0	0	0	0	0	0	0	0	36	0	0	0	0	0	0	0	0	0	0	0	0	0	0	0	0	0	0	0
species	Planomicrobium_uncultured bacterium	0	0	0	0	4	0	0	0	0	0	0	0	1	0	0	0	7	0	4	0	1	0	1	0	0	0	0	0	0	0
species	Porphyromonas_Other	0	0	0	0	13	0	0	0	0	0	21	0	0	0	0	0	0	0	0	0	0	0	0	0	0	0	0	0	0	0
species	Porphyromonas_uncultured bacterium	0	0	0	0	0	0	0	0	0	0	0	0	0	2	1	0	0	0	0	0	0	36	0	0	6	0	7	10	0	0
species	Prevotella 6_uncultured bacterium	0	0	0	0	7	0	0	0	0	0	2	0	0	0	0	0	0	0	0	0	0	0	0	0	0	0	0	0	0	0
species	Prevotella_Other	0	0	0	0	28	0	0	0	0	0	5	0	0	0	2	0	0	0	0	0	0	0	0	0	0	0	0	0	0	0
species	Prevotella_Prevotella bivia	0	0	0	0	0	0	0	0	8	0	1	0	0	0	0	0	0	0	0	0	0	0	0	0	0	0	0	0	0	0
species	Propionimicrobium_Other	0	0	0	0	0	0	6	0	1	0	423	0	0	0	0	3374	0	0	0	0	0	0	0	0	0	0	0	0	0	0
species	Proteus_Other	0	0	5263	1	0	0	3	0	33	0	1328	0	92	292	2	572	0	0	0	0	0	0	0	0	0	0	0	0	0	0
species	Proteus_Proteus mirabilis	0	0	27	0	0	0	42	0	0	0	6	0	1	6126	5	11	6	0	0	3	1	0	1	0	0	0	1	0	6	1
species	Proteus_uncultured bacterium	0	0	0	0	0	0	0	0	0	0	0	0	0	0	0		98	0	0	12	20	0	76	2	3	0	8	0	36	22
species	Providencia_Other	0	0	0	0	0	0	0	0	0	0	581	0	0	0	0	3752	0	0	0	0	0	0	0	0	0	0	0	0	0	0
species	Providencia_Providencia stuartii ATCC 25827	0	0	0	0	0	0	0	0	0	0	6	0	0	1	2	5	0	0	0	0	0	0	0	0	0	0	0	0	2	0
species	Providencia_uncultured bacterium	0	0	0	0	0	0	0	0	0	0	0	0	0	0	0	7	0	0	0	0	0	0	0	0	0	0	0	0	0	0
species	Pseudomonas_Other	0	0	0	0	0	0	0	4	0	0	3	0	0	0	186	0	0	0	0	0	0	0	0	0	0	0	0	0	0	0
species	Pseudomonas_Pseudomonas aeruginosa	0	0	0	0	0	0	0	4	0	0	1	0	0	0	1720	0	0	0	0	36	5	0	0	0	0	0	0	0	0	0
species	Pseudomonas_Pseudomonas otitidis	0	0	0	0	0	0	0	0	0	0	0	0	0	0	3	0	0	0	0	0	0	0	0	0	0	0	0	0	0	0
species	Pseudomonas_uncultured bacterium	0	0	0	0	0	0	0	0	0	0	0	0	0	0	16	0	0	0	0	0	0	0	0	0	0	0	0	0	0	0
species	Sneathia_uncultured bacterium	0	0	0	0	0	0	0	0	0	0	0	0	0	0	0	0	0	0	0	0	0	0	0	0	0	0	0	6	0	0
species	Staphylococcus_Other	0	0	0	20	0	0	0	0	0	0	0	0	0	0	0	0	0	0	0	0	0	0	0	0	0	0	0	0	0	0
species	Staphylococcus_Staphylococcus aureus	0	0	0	55	0	0	0	0	0	0	0	0	0	0	0	0	0	0	0	0	0	0	0	0	0	0	0	0	0	0
species	Staphylococcus_Staphylococcus epidermidis	0	0	0	3	0	0	0	0	0	0	0	0	0	0	1	0	0	0	0	0	0	0	0	0	0	0	0	0	0	0
species	Staphylococcus_uncultured bacterium	0	0	0	11276	9	0	0	0	2	0	1	0	0	2	307	26	0	0	0	11	18	0	0	0	0	0	0	0	0	0
species	Staphylococcus_uncultured Staphylococcus sp.	0	0	0	1	0	0	0	0	0	0	0	0	0	0	1	0	0	0	0	0	0	0	0	0	0	0	0	0	0	0
species	Streptococcus_Other	0	0	0	0	0	0	0	0	17	0	0	0	0	0	0	2	0	0	0	0	0	0	0	0	0	0	0	0	0	0
species	Streptococcus_Streptococcus anginosus	0	0	0	0	0	0	0	0	49	0	0	0	0	0	0	9	0	0	0	0	1	0	0	0	0	0	0	0	0	0
species	Streptococcus_uncultured bacterium	0	0	0	0	0	0	0	0	2587	0	254	0	0	0	0	1165	0	0	0	0	0	0	0	0	0	0	0	0	0	0
species	Sutterella_uncultured organism	0	0	0	0	1	0	0	0	0	0	2	0	0	0	0	0	0	0	0	0	0	0	0	0	0	0	0	0	0	0
species	Varibaculum_uncultured bacterium	0	0	0	0	0	0	0	0	0	0	1	0	0	0	4	0	0	0	0	0	0	0	0	0	0	0	0	0	0	0
species	Veillonella_Other	0	0	0	0	0	0	0	0	6	0	0	0	0	0	0	0	0	0	0	0	0	0	0	0	0	0	0	0	0	0
species	Veillonella_uncultured bacterium	0	0	0	0	0	0	1	0	576	53	1555	0	0	2	0	0	0	0	0	0	0	0	0	0	0	0	0	0	0	0
species	Veillonella_uncultured organism	0	0	0	0	0	0	0	0	1	0	5	0	0	0	0	0	0	0	0	0	0	0	8	0	1	7	3	0	0	0
species	Bacillales_Other	1	4	3	4	33	0	0	0	0	0	0	0	0	0	13	1	0	0	0	0	0	0	0	0	0	0	0	0	0	0
species	Enterococcaceae_Other	0	0	0	0	0	0	15	0	0	0	0	0	2	0	0	0	0	0	0	0	0	0	0	0	0	0	0	0	0	0
species	Fusobacteriales_Other	0	0	0	0	0	0	0	0	15	0	7	0	0	0	0	0	0	0	0	0	0	0	0	0	0	0	0	0	0	0
species	Enterobacteriales_Other	104	3	79	0	0	2	0	139	46	1	10	9	1	4	0	15	0	0	0	0	0	0	0	0	0	0	0	0	0	0
species	Unclassified	0	0	0	0	0	0	0	0	0	0	13	0	0	0	3	0	263	95	305	230	195	303	38	28	63	68	112	18	210	99
species	Family XI_uncultured_uncultured bacterium	0	0	0	0	7	0	0	0	0	0	0	0	0	0	0	0	0	0	0	0	0	0	0	0	0	0	0	0	0	0
Taxonomic rank	Taxa	1	2	3	4	5	6	7	8	9	10	11	12	13	14	15	16	17	18	19	20	21	22	23	24	25	26	27	28	29	30
genus	Acinetobacter	0	0	0	0	0	0	0	0	0	0	0	0	0	0	8	0	0	0	0	0	0	0	0	0	0	0	0	0	0	0
genus	Actinomyces	0	0	0	0	0	0	0	299	0	0	0	0	0	0	2	0	0	0	0	2	17	0	0	0	0	0	0	0	0	0
genus	Aerococcus	0	0	0	0	0	0	2094	0	127	117	0	0	829	0	121	0	0	0	0	0	0	0	5	0	0	8	0	0	0	0
genus	Alcaligenes	0	0	0	0	0	1	0	0	0	0	0	0	0	403	1	0	0	0	0	19	1	0	0	0	0	0	2	0	0	0
genus	Anaerococcus	0	0	81	0	32	0	0	0	1	0	0	0	8	5	644	4	59	0	0	6	32	8	0	1	9	0	12	10	3	2
genus	Arcanobacterium	0	0	0	0	3	0	0	0	0	0	0	0	0	0	0	0	0	0	0	0	0	0	0	0	0	0	0	0	0	0
genus	Atopobium	0	0	0	0	1	0	0	0	0	0	2	0	0	0	0	0	0	0	0	0	0	0	0	0	0	0	0	0	0	0
genus	Atopostipes	0	0	0	0	0	0	0	0	0	0	0	0	0	954	1	0	0	0	0	0	0	0	0	0	0	0	0	0	0	0
genus	Bacillales_Other	1	4	3	4	33	0	0	0	0	0	0	0	0	0	13	1	0	0	0	0	0	0	0	0	0	0	0	0	0	0
genus	Bacteroides	0	0	0	0	0	0	0	0	0	0	1189	0	0	0	0	0	0	0	0	0	0	0	0	0	0	0	0	0	0	0
genus	Bergeyella	0	0	0	0	0	0	0	0	129	0	0	0	0	0	0	0	0	0	0	0	0	0	0	0	0	0	0	0	0	0
genus	Bifidobacterium	0	0	0	0	0	0	0	1	0	1	148	0	0	1	1	0	0	0	0	0	0	0	0	0	0	0	0	0	0	0
genus	Campylobacter	0	0	0	0	6	0	0	1	0	0	309	0	0	0	7	5150	174	0	0	0	0	10	0	0	6	0	18	2	72	34
genus	Corynebacterium 1	0	0	0	0	0	0	0	0	34	0	0	0	0	93	1	0	0	0	0	0	0	0	0	0	4	0	0	0	0	0
genus	Cronobacter	16	0	0	0	0	0	0	0	3	0	0	0	0	0	0	0	0	0	0	0	1	2	0	0	0	0	0	0	0	0
genus	Dialister	0	0	0	0	3	0	0	0	0	0	0	0	0	0	0	0	0	0	0	0	0	0	0	0	0	0	0	0	0	0
genus	Eikenella	0	0	0	0	0	0	0	0	0	0	0	0	0	0	0	0	0	0	0	0	0	26	0	0	1	0	9	0	0	0
genus	Enterobacter	97	11	0	0	5	11	0	2954	24	2	1	14	0	0	0	228	2	2	23	6	5	0	1	0	0	3	1	0	5	2
genus	Enterobacteriaceae_Other	104	3	79	0	0	2	0	139	46	1	10	9	1	4	0	15	0	0	0	0	0	0	0	0	0	0	0	0	0	0
genus	Enterococcaceae_Other	0	0	0	0	0	0	15	0	0	0	0	0	2	0	0	0	0	0	0	0	0	0	0	0	0	0	0	0	0	0
genus	Enterococcus	654	657	655	4666	6633	53	243	0	3	1	546	50	95	0	11143	2100	332	1	74	30	51	1	24	0	36	1	9	8	8	1
genus	Escherichia-Shigella	2	6164	0	3	0	6774	3	18	83	70	194	2481	20	9	0	1422	217	113	2	7	11	1	30	1	6	78	4	0	149	55
genus	Ezakiella	0	0	0	0	45	0	0	0	0	0	3	0	0	0	0	0	0	0	0	0	0	0	0	0	0	0	0	52	0	0
genus	Facklamia	0	0	0	0	0	0	77	0	0	0	0	0	1	0	0	0	0	0	0	0	0	0	0	0	0	0	0	0	0	0
genus	Fastidiosipila	0	0	0	0	0	0	451	0	0	0	0	0	1195	0	89	0	10	0	0	4	16	3	0	2	3	0	6	0	1	0
genus	Finegoldia	0	0	0	7	2	0	0	0	0	0	0	0	0	0	11	0	0	0	0	0	0	0	0	0	0	0	0	0	0	0
genus	Fusobacteriales_Other	0	0	0	0	0	0	0	0	15	0	7	0	0	0	0	0	0	0	0	0	0	0	0	0	0	0	0	0	0	0
genus	Fusobacterium	0	0	0	0	0	2	0	0	7346	0	2684	0	0	0	6	0	0	0	0	0	0	332	0	0	19	0	35	9	0	0
genus	Howardella	0	0	0	0	0	0	0	0	141	0	0	0	0	0	0	0	0	0	0	0	0	0	0	0	0	0	0	0	0	0
genus	Klebsiella	4155	0	0	0	0	0	0	6	740	0	0	0	0	0	1	2	0	0	0	0	0	0	0	0	0	0	0	0	0	0
genus	Kluyvera	0	0	0	0	0	0	0	0	0	0	0	0	0	0	0	0	0	0	256	1	0	0	0	0	0	0	0	0	0	0
genus	Mobiluncus	0	0	0	0	3	0	0	0	0	0	0	0	0	0	0	0	0	0	0	0	0	0	0	0	0	0	0	0	0	0
genus	Morganella	0	0	0	0	0	0	0	0	2	0	1083	0	92	1	0	0	0	0	0	0	0	16	14	7	34	0	90	0	0	0
genus	Negativicoccus	0	0	0	0	0	0	0	0	0	0	0	0	0	0	6	0	0	0	0	0	0	0	0	0	0	0	0	0	0	0
genus	Neisseria	0	0	0	0	0	0	0	0	0	0	0	0	0	0	0	0	0	0	0	0	0	21	0	0	0	0	6	0	0	0
genus	Oligella	0	0	0	0	0	0	0	0	0	0	0	0	0	11	0	0	0	0	0	0	0	0	0	0	0	0	0	0	0	0
genus	Paenalcaligenes	0	0	0	0	0	0	0	0	0	0	0	0	0	66	0	0	0	0	0	0	0	0	0	0	0	0	0	0	0	0
genus	Parvimonas	0	0	0	0	2	0	0	0	175	0	564	0	0	2	0	0	4	0	0	0	0	2	0	0	5	0	5	0	0	0
genus	Peptococcus	0	0	0	0	0	0	0	0	0	0	0	0	0	0	0	0	0	0	0	0	0	0	0	0	0	0	0	5	0	0
genus	Peptoniphilus	0	0	0	0	18	0	0	1	3	0	174	0	0	1	19	931	31	0	0	0	0	4	0	0	5	0	21	231	1	1
genus	Peptostreptococcus	0	0	0	0	0	0	0	0	0	0	36	0	0	0	0	0	0	0	0	0	0	0	0	0	0	0	0	0	0	0
genus	Planomicrobium	0	0	0	0	4	0	0	0	0	0	0	0	1	0	0	0	7	0	4	0	1	0	1	0	0	0	0	0	0	0
genus	Porphyromonas	0	0	0	0	13	0	0	0	0	0	21	0	0	2	1	0	0	0	0	0	0	36	0	0	6	0	7	12	0	0
genus	Prevotella	0	0	0	0	28	0	0	0	8	0	6	0	0	0	2	0	0	0	0	0	0	0	0	0	0	0	0	0	0	0
genus	Prevotella 6	0	0	0	0	7	0	0	0	0	0	2	0	0	0	0	0	0	0	0	0	0	0	0	0	0	0	0	0	0	0
genus	Propionimicrobium	0	0	0	0	0	0	6	0	1	0	423	0	0	0	0	3374	0	0	0	0	0	3	2	0	0	0	8	0	0	0
genus	Proteus	0	0	5290	1	0	0	45	0	33	0	1334	0	93	6418	7	583	107	0	0	15	21	6	80	27	38	0	77	0	42	24
genus	Providencia	0	0	0	0	0	0	0	0	0	0	587	0	0	1	2	3764	55	0	0	106	27	0	0	0	0	0	0	0	84	50
genus	Pseudomonas	0	0	0	0	0	0	0	8	0	0	4	0	0	0	1925	0	0	0	0	111	14	0	0	0	0	0	0	0	0	0
genus	Sneathia	0	0	0	0	0	0	0	0	0	0	0	0	0	0	0	0	0	0	0	0	0	0	0	0	0	0	0	6	0	0
genus	Staphylococcus	0	0	0	11355	9	0	0	0	2	0	1	0	0	2	309	26	0	0	1	40	105	0	0	0	0	0	0	0	0	0
genus	Streptococcus	0	0	0	0	0	0	0	0	2653	0	254	0	0	0	0	1176	0	0	0	9	46	0	0	0	0	0	0	5	0	0
genus	Sutterella	0	0	0	0	1	0	0	0	0	0	2	0	0	0	0	0	0	0	0	0	0	0	0	0	0	0	0	0	0	0
genus	Unasigned_Other	0	0	0	0	0	0	0	0	0	0	13	0	0	0	3	0	1	0	26	2	3	3	5	0	0	0	2	0	2	1
genus	Family XI_uncultured	0	0	0	0	7	0	0	0	0	0	0	0	0	0	0	0	0	0	0	0	0	0	0	0	0	0	0	0	0	0
genus	Varibaculum	0	0	0	0	0	0	0	0	0	0	1	0	0	0	4	0	0	0	0	0	0	0	0	0	0	0	0	0	0	0
genus	Veillonella	0	0	0	0	0	0	1	0	583	53	1560	0	0	2	0	0	0	0	0	0	0	0	8	0	1	7	3	0	0	0
Taxonomic rank	Taxa	1	2	3	4	5	6	7	8	9	10	11	12	13	14	15	16	17	18	19	20	21	22	23	24	25	26	27	28	29	30
family	Actinomycetaceae	0	0	0	0	6	0	0	299	0	0	1	0	0	0	6	0	27	0	17	2	17	0	0	0	0	0	0	0	0	1
family	Aerococcaceae	0	0	0	0	0	0	2171	0	127	117	0	0	830	0	121	0	0	0	0	0	0	0	5	0	0	8	0	0	0	0
family	Alcaligenaceae	0	0	0	0	1	1	0	0	0	0	2	0	0	480	1	0	0	0	0	19	1	0	0	0	0	0	2	0	0	0
family	Bacillales_Other	1	4	3	4	33	0	0	0	0	0	0	0	0	0	13	1	0	0	0	0	0	0	0	0	0	0	0	0	0	0
family	Bacteroidaceae	0	0	0	0	0	0	0	0	0	0	1189	0	0	0	0	0	0	0	0	0	0	0	0	0	0	0	0	0	0	0
family	Bifidobacteriaceae	0	0	0	0	0	0	0	1	0	1	148	0	0	1	1	0	0	0	0	0	0	0	0	0	0	0	0	0	0	0
family	Campylobacteraceae	0	0	0	0	6	0	0	1	0	0	309	0	0	0	7	5150	174	0	0	0	0	10	0	0	6	0	18	2	72	34
family	Carnobacteriaceae	0	0	0	0	0	0	0	0	0	0	0	0	0	954	1	0	0	0	0	0	0	0	0	0	0	0	0	0	0	0
family	Coriobacteriaceae	0	0	0	0	1	0	0	0	0	0	2	0	0	0	0	0	0	0	0	0	0	0	0	0	0	0	0	0	0	0
family	Corynebacteriaceae	0	0	0	0	0	0	0	0	34	0	0	0	0	93	1	0	0	0	0	0	0	0	0	0	4	0	0	0	0	0
family	Enterobacteriaceae	4374	6178	5369	4	5	6787	48	3117	931	73	3209	2504	206	6433	10	6014	382	115	307	137	68	28	130	35	78	81	174	0	282	132
family	Enterococcaceae	654	657	655	4666	6633	53	258	0	3	1	546	50	97	0	11143	2100	332	1	74	30	51	1	24	0	36	1	9	8	8	1
family	Family XI	0	0	81	7	106	0	0	1	179	0	741	0	8	8	674	935	94	0	0	6	32	14	0	1	19	0	38	293	4	3
family	Flavobacteriaceae	0	0	0	0	0	0	0	0	129	0	0	0	0	0	0	0	0	0	0	0	0	0	0	0	0	0	0	0	0	0
family	Fusobacteriaceae	0	0	0	0	0	2	0	0	7346	0	2684	0	0	0	6	0	0	0	0	0	0	332	0	0	19	0	35	9	0	0
family	Fusobacteriales_Other	0	0	0	0	0	0	0	0	15	0	7	0	0	0	0	0	0	0	0	0	0	0	0	0	0	0	0	0	0	0
family	Lachnospiraceae	0	0	0	0	0	0	0	0	141	0	0	0	0	0	0	0	0	0	0	0	0	0	0	0	0	0	0	0	0	0
family	Leptotrichiaceae	0	0	0	0	0	0	0	0	0	0	0	0	0	0	0	0	0	0	0	0	0	0	0	0	0	0	0	6	0	0
family	Moraxellaceae	0	0	0	0	0	0	0	0	0	0	0	0	0	0	8	0	0	0	0	0	0	0	0	0	0	0	0	0	0	0
family	Neisseriaceae	0	0	0	0	0	0	0	0	0	0	0	0	0	0	0	0	0	0	0	0	0	47	0	0	1	0	15	0	0	0
family	Peptococcaceae	0	0	0	0	0	0	0	0	0	0	0	0	0	0	0	0	0	0	0	0	0	0	0	0	0	0	0	5	0	0
family	Peptostreptococcaceae	0	0	0	0	0	0	0	0	0	0	36	0	0	0	0	0	0	0	0	0	0	0	0	0	0	0	0	0	0	0
family	Planococcaceae	0	0	0	0	4	0	0	0	0	0	0	0	1	0	0	0	7	0	4	0	1	0	1	0	0	0	0	0	0	0
family	Porphyromonadaceae	0	0	0	0	13	0	0	0	0	0	21	0	0	2	1	0	0	0	0	0	0	36	0	0	6	0	7	12	0	0
family	Prevotellaceae	0	0	0	0	35	0	0	0	8	0	8	0	0	0	2	0	0	0	0	0	0	0	0	0	0	0	0	0	0	0
family	Propionibacteriaceae	0	0	0	0	0	0	6	0	1	0	423	0	0	0	0	3374	0	0	0	0	0	3	2	0	0	0	8	0	0	0
family	Pseudomonadaceae	0	0	0	0	0	0	0	8	0	0	4	0	0	0	1925	0	0	0	0	111	14	0	0	0	0	0	0	0	0	0
family	Ruminococcaceae	0	0	0	0	0	0	451	0	0	0	0	0	1195	0	89	0	10	0	0	4	16	3	0	2	3	0	6	0	1	0
family	Staphylococcaceae	0	0	0	11355	9	0	0	0	2	0	1	0	0	2	309	26	0	0	1	40	105	0	0	0	0	0	0	0	0	0
family	Streptococcaceae	0	0	0	0	0	0	0	0	2653	0	254	0	0	0	0	1176	0	0	0	9	46	0	0	0	0	0	0	5	0	0
family	Unasigned_Other	0	0	0	0	0	0	0	0	0	0	13	0	0	0	3	0	0	0	0	0	0	0	0	0	0	0	0	0	0	0
family	Veillonellaceae	0	0	0	0	3	0	1	0	583	53	1560	0	0	2	6	0	0	0	0	0	0	0	8	0	1	7	3	0	0	0
Taxonomic rank	Taxa	1	2	3	4	5	6	7	8	9	10	11	12	13	14	15	16	17	18	19	20	21	22	23	24	25	26	27	28	29	30
order	Actinomycetales	0	0	0	0	6	0	0	299	0	0	1	0	0	0	6	0	27	0	17	2	17	0	0	0	0	0	0	0	0	1
order	Bacillales	1	4	3	11359	46	0	0	0	2	0	1	0	1	2	322	27	7	0	5	40	106	0	1	0	0	0	0	0	0	0
order	Bacteroidales	0	0	0	0	48	0	0	0	8	0	1218	0	0	2	3	0	0	0	0	0	0	36	0	0	6	0	7	12	0	0
order	Bifidobacteriales	0	0	0	0	0	0	0	1	0	1	148	0	0	1	1	0	0	0	0	0	0	0	0	0	0	0	0	0	0	0
order	Burkholderiales	0	0	0	0	1	1	0	0	0	0	2	0	0	480	1	0	0	0	0	19	1	0	0	0	0	0	2	0	0	0
order	Campylobacterales	0	0	0	0	6	0	0	1	0	0	309	0	0	0	7	5150	174	0	0	0	0	10	0	0	6	0	18	2	72	34
order	Clostridiales	0	0	81	7	106	0	451	1	320	0	777	0	1203	8	763	935	104	0	0	10	48	17	0	3	22	0	44	298	5	3
order	Coriobacteriales	0	0	0	0	1	0	0	0	0	0	2	0	0	0	0	0	0	0	0	0	0	0	0	0	0	0	0	0	0	0
order	Corynebacteriales	0	0	0	0	0	0	0	0	34	0	0	0	0	93	1	0	0	0	0	0	0	0	0	0	4	0	0	0	0	0
order	Enterobacteriales	4374	6178	5369	4	5	6787	48	3117	931	73	3209	2504	206	6433	10	6014	382	115	307	137	68	28	130	35	78	81	174	0	282	132
order	Flavobacteriales	0	0	0	0	0	0	0	0	129	0	0	0	0	0	0	0	0	0	0	0	0	0	0	0	0	0	0	0	0	0
order	Fusobacteriales	0	0	0	0	0	2	0	0	7361	0	2691	0	0	0	6	0	0	0	0	0	0	332	0	0	19	0	35	15	0	0
order	Lactobacillales	654	657	655	4666	6633	53	2429	0	2783	118	800	50	927	954	11265	3276	332	1	74	39	97	1	29	0	36	9	9	13	8	1
order	Neisseriales	0	0	0	0	0	0	0	0	0	0	0	0	0	0	0	0	0	0	0	0	0	47	0	0	1	0	15	0	0	0
order	Unclassified	0	0	0	0	0	0	0	0	0	0	13	0	0	0	3	0	0	0	0	0	0	0	0	0	0	0	0	0	0	0
order	Propionibacteriales	0	0	0	0	0	0	6	0	1	0	423	0	0	0	0	3374	0	0	0	0	0	3	2	0	0	0	8	0	0	0
order	Pseudomonadales	0	0	0	0	0	0	0	8	0	0	4	0	0	0	1933	0	0	0	0	111	14	0	0	0	0	0	0	0	0	0
order	Selenomonadales	0	0	0	0	3	0	1	0	583	53	1560	0	0	2	6	0	0	0	0	0	0	0	8	0	1	7	3	0	0	0
Taxonomic rank	Taxa	1	2	3	4	5	6	7	8	9	10	11	12	13	14	15	16	17	18	19	20	21	22	23	24	25	26	27	28	29	30
class	Actinobacteria	0	0	0	0	6	0	6	300	35	1	572	0	0	94	8	3374	27	0	17	2	17	3	2	0	4	0	8	0	0	1
class	Bacilli	655	661	658	16025	6679	53	2429	0	2785	118	801	50	928	956	11587	3303	339	1	79	79	203	1	30	0	36	9	9	13	8	1
class	Bacteroidia	0	0	0	0	48	0	0	0	8	0	1218	0	0	2	3	0	0	0	0	0	0	36	0	0	6	0	7	12	0	0
class	Betaproteobacteria	0	0	0	0	1	1	0	0	0	0	2	0	0	480	1	0	0	0	0	19	1	47	0	0	1	0	17	0	0	0
class	Clostridia	0	0	81	7	106	0	451	1	320	0	777	0	1203	8	763	935	104	0	0	10	48	17	0	3	22	0	44	298	5	3
class	Coriobacteriia	0	0	0	0	1	0	0	0	0	0	2	0	0	0	0	0	0	0	0	0	0	0	0	0	0	0	0	0	0	0
class	Epsilonproteobacteria	0	0	0	0	6	0	0	1	0	0	309	0	0	0	7	5150	174	0	0	0	0	10	0	0	6	0	18	2	72	34
class	Flavobacteriia	0	0	0	0	0	0	0	0	129	0	0	0	0	0	0	0	0	0	0	0	0	0	0	0	0	0	0	0	0	0
class	Fusobacteria	0	0	0	0	0	2	0	0	7361	0	2691	0	0	0	6	0	0	0	0	0	0	332	0	0	19	0	35	15	0	0
class	Gammaproteobacteria	4374	6178	5369	4	5	6787	48	3125	931	73	3213	2504	206	6433	1943	6014	382	115	307	248	82	28	130	35	78	81	174	0	282	132
class	Negativicutes	0	0	0	0	3	0	1	0	583	53	1560	0	0	2	6	0	0	0	0	0	0	0	8	0	1	7	3	0	0	0
class	Unclassified_Other	0	0	0	0	0	0	0	0	0	0	13	0	0	0	3	0	0	0	0	0	0	0	0	0	0	0	0	0	0	0
Taxonomic rank	Taxa	1	2	3	4	5	6	7	8	9	10	11	12	13	14	15	16	17	18	19	20	21	22	23	24	25	26	27	28	29	30
phylum	Actinobacteria	0	0	0	0	7	0	6	300	35	1	574	0	0	94	8	3374	27	0	17	2	17	3	2	0	4	0	8	0	0	1
phylum	Bacteroidetes	0	0	0	0	48	0	0	0	137	0	1218	0	0	2	3	0	0	0	0	0	0	36	0	0	6	0	7	12	0	0
phylum	Firmicutes	655	661	739	16032	6788	53	2881	1	3688	171	3138	50	2131	966	12356	4238	443	1	79	89	251	18	38	3	59	16	56	311	13	4
phylum	Fusobacteria	0	0	0	0	0	2	0	0	7361	0	2691	0	0	0	6	0	0	0	0	0	0	332	0	0	19	0	35	15	0	0
phylum	Proteobacteria	4374	6178	5369	4	12	6788	48	3126	931	73	3524	2504	206	6913	1951	11164	556	115	307	267	83	85	130	35	85	81	209	2	354	166
phylum	Unassigned_Other	0	0	0	0	0	0	0	0	0	0	13	0	0	0	3	0	0	0	0	0	0	0	0	0	0	0	0	0	0	0

## Sheet: Table S7
Table S7: Multiple regression model
	p-values								FDR corrected p-values
Taxa	A.schaaliiYES.p	Age.p	HydronephrosisYES.p	Prostate_cancerYES.p	MalignityYES.p	SexM.p	MaterialUrine.p	Type.of.catheterUC.p	A.schaaliiYES.p.fdr	Age.p.fdr	HydronephrosisYES.p.fdr	Prostate_cancerYES.p.fdr	MalignityYES.p.fdr	SexM.p.fdr	MaterialUrine.p.fdr	Type.of.catheterUC.p.fdr
Actinotignum	NA	0.286	0.117	0.725	0.9	0.3	0.732	0.578	NA	0.6615	0.999	0.95159	0.94186	0.86625	0.98267	0.95114
Actinomyces	0.159	0.138	0.073	0.379	0.375	0.265	0.099	0.688	0.55929	0.5175	0.999	0.87818	0.9011	0.86625	0.98267	0.95114
Aerococcus	0.025	0.11	0.707	0.867	0.741	0.535	0.884	0.875	0.18	0.45	0.999	0.95159	0.9011	0.86625	0.98267	0.95114
Alcaligenes	0.168	0.455	0.823	0.574	0.779	0.905	0.638	0.621	0.55929	0.6975	0.999	0.87818	0.9011	0.945	0.98267	0.95114
Anaerococcus	0.839	0.024	0.566	0.439	0.654	0.412	0.164	0.183	0.90643	0.15429	0.999	0.87818	0.9011	0.86625	0.98267	0.95114
Atopostipes	0.351	0.768	0.966	0.859	0.723	0.83	0.777	0.882	0.63435	0.85061	0.999	0.95159	0.9011	0.91098	0.98267	0.95114
Bacillales_Other	0.143	0.569	0.813	0.487	0.388	0.21	0.127	0.481	0.55929	0.71125	0.999	0.87818	0.9011	0.86625	0.98267	0.95114
Bacteroides	0.413	0.569	0.602	0.967	0.798	0.355	0.54	0.413	0.63435	0.71125	0.999	0.98898	0.9011	0.86625	0.98267	0.95114
Bergeyella	0.39	0.006	0.761	0.163	0.025	0.069	0.921	0.373	0.63435	0.09	0.999	0.85179	0.375	0.63	0.98267	0.95114
Bifidobacterium	0.419	0.621	0.814	0.999	0.662	0.081	0.436	0.264	0.63435	0.75527	0.999	0.999	0.9011	0.63	0.98267	0.95114
Campylobacter	0.846	0.191	0.417	0.783	0.266	0.799	0.783	0.888	0.90643	0.55969	0.999	0.95159	0.9011	0.89888	0.98267	0.95114
Corynebacterium_1	0.649	0.514	0.755	0.444	0.493	0.659	0.602	0.605	0.81125	0.6975	0.999	0.87818	0.9011	0.89864	0.98267	0.95114
Cronobacter	0.259	0.411	0.9	0.511	0.818	0.579	0.609	0.843	0.62786	0.69589	0.999	0.87818	0.9011	0.86625	0.98267	0.95114
Eikenella	0.354	0.465	0.62	0.233	0.711	0.737	0.383	0.522	0.63435	0.6975	0.999	0.85179	0.9011	0.89888	0.98267	0.95114
Enterobacter	0.018	0.43	0.676	0.644	0.42	0.782	0.722	0.417	0.18	0.69589	0.999	0.87818	0.9011	0.89888	0.98267	0.95114
Enterobacteriaceae_Other	0.04	0.775	0.555	0.02	0.051	0.378	0.881	0.612	0.225	0.85061	0.999	0.45	0.468	0.86625	0.98267	0.95114
Enterococcaceae_Other	0.8	0.234	0.999	0.265	0.602	0.575	0.939	0.837	0.9	0.61941	0.999	0.85179	0.9011	0.86625	0.98267	0.95114
Enterococcus	0.287	0.862	0.88	0.505	0.569	0.586	0.264	0.737	0.62786	0.91674	0.999	0.87818	0.9011	0.86625	0.98267	0.95114
EscherichiaShigella	0.028	0.011	0.641	0.096	0.137	0.708	0.609	0.904	0.18	0.099	0.999	0.85179	0.685	0.89888	0.98267	0.95114
Ezakiella	0.319	0.527	0.759	0.119	0.079	0.084	0.563	0.66	0.63435	0.6975	0.999	0.85179	0.5925	0.63	0.98267	0.95114
Facklamia	0.734	0.199	0.987	0.322	0.779	0.616	0.625	0.867	0.86077	0.55969	0.999	0.87088	0.9011	0.86625	0.98267	0.95114
Fastidiosipila	0.099	0.363	0.652	0.262	0.42	0.929	0.147	0.284	0.4725	0.68812	0.999	0.85179	0.9011	0.945	0.98267	0.95114
Finegoldia	0.556	0.917	0.329	0.79	0.976	0.099	0.205	0.209	0.73588	0.93784	0.999	0.95159	0.976	0.63643	0.98267	0.95114
Fusobacteriales_Other	0.93	0.001	0.755	0.2	0.052	0.483	0.396	0.062	0.95114	0.045	0.999	0.85179	0.468	0.86625	0.98267	0.95114
Fusobacterium	0.023	0.876	0.519	0.399	0.311	0.133	0.964	0.93	0.18	0.91674	0.999	0.87818	0.9011	0.74812	0.984	0.95114
Howardella	0.397	0.006	0.766	0.155	0.024	0.066	0.92	0.375	0.63435	0.09	0.999	0.85179	0.375	0.63	0.98267	0.95114
Klebsiella	0.287	0.336	0.932	0.4	0.512	0.582	0.714	0.514	0.62786	0.68727	0.999	0.87818	0.9011	0.86625	0.98267	0.95114
Kluyvera	0.746	0.703	0.807	0.854	0.844	0.546	0.636	0.638	0.86077	0.81115	0.999	0.95159	0.90429	0.86625	0.98267	0.95114
Morganella	0.003	0.504	0.95	0.852	0.821	0.446	0.339	0.512	0.0675	0.6975	0.999	0.95159	0.9011	0.86625	0.98267	0.95114
Neisseria	0.518	0.433	0.497	0.176	0.66	0.791	0.288	0.459	0.70636	0.69589	0.999	0.85179	0.9011	0.89888	0.98267	0.95114
Paenalcaligenes	0.231	0.968	0.915	0.634	0.625	0.78	0.835	0.841	0.62786	0.968	0.999	0.87818	0.9011	0.89888	0.98267	0.95114
Parvimonas	0.293	0.294	0.339	0.329	0.388	0.563	0.753	0.615	0.62786	0.6615	0.999	0.87088	0.9011	0.86625	0.98267	0.95114
Peptoniphilus	0.9	0.064	0.394	0.516	0.107	0.048	0.984	0.999	0.94186	0.2925	0.999	0.87818	0.6525	0.63	0.984	0.999
Peptostreptococcus	0.673	0.283	0.726	0.562	0.557	0.196	0.526	0.272	0.81851	0.6615	0.999	0.87818	0.9011	0.86625	0.98267	0.95114
Planomicrobium	0.328	0.315	0.988	0.182	0.116	0.945	0.156	0.702	0.63435	0.675	0.999	0.85179	0.6525	0.945	0.98267	0.95114
Porphyromonas	0.29	0.483	0.624	0.237	0.223	0.39	0.933	0.914	0.62786	0.6975	0.999	0.85179	0.9011	0.86625	0.98267	0.95114
Prevotella	0.615	0.029	0.381	0.59	0.687	0.917	0.245	0.252	0.79071	0.16313	0.999	0.87818	0.9011	0.945	0.98267	0.95114
Propionimicrobium	0.517	0.367	0.907	0.934	0.956	0.719	0.755	0.763	0.70636	0.68812	0.999	0.98058	0.976	0.89888	0.98267	0.95114
Proteus	0.437	0.021	0.837	0.011	0.019	0.431	0.385	0.08	0.63435	0.15429	0.999	0.45	0.375	0.86625	0.98267	0.95114
Providencia	0.105	0.171	0.716	0.606	0.383	0.592	0.731	0.387	0.4725	0.55969	0.999	0.87818	0.9011	0.86625	0.98267	0.95114
Pseudomonas	0.96	0.197	0.652	0.767	0.817	0.606	0.849	0.916	0.96	0.55969	0.999	0.95159	0.9011	0.86625	0.98267	0.95114
Staphylococcus	0.174	0.065	0.078	0.937	0.5	0.3	0.196	0.748	0.55929	0.2925	0.999	0.98058	0.9011	0.86625	0.98267	0.95114
Streptococcus	0.436	0.433	0.971	0.629	0.522	0.043	0.864	0.584	0.63435	0.69589	0.999	0.87818	0.9011	0.63	0.98267	0.95114
Unasigned_Other	0.242	0.647	0.595	0.312	0.361	0.519	0.366	0.337	0.62786	0.76618	0.999	0.87088	0.9011	0.86625	0.98267	0.95114
Veillonella	0.021	0.009	0.431	0.229	0.181	0.428	0.281	0.407	0.18	0.099	0.999	0.85179	0.8145	0.86625	0.98267	0.95114
p<0.05 are in red
Values for Actinotignum genus are framed
Histograms of p-values from multiple regression

## Sheet: Table S8
Table S8: PERMANOVA on residual matrix
Taxonomic rank	Species		Genus		Family		Order		Class		Phylum
Model p-value	0.013		0.0005		0.015		0.072		0.05		0.35
	R2	p-value	R2	p-value	R2	p-value	R2	p-value	R2	p-value	R2	p-value
A. schaalii presence/absence	0.107	0.00367	0.133	0.001	0.131	0.00267	0.157	0.00633	0.112	0.0257	0.191	0.0257
Age	0.101	0.00267	0.125	0.001	0.125	0.00433	0.11	0.0253	0.174	0.005	-0.0159	0.926
Sex	0.032	0.392	0.049	0.113	0.0778	0.0367	0.0756	0.0843	0.1	0.0503	0.136	0.0686
Material	0.0258	0.515	0.0151	0.791	0.0235	0.515	0.0315	0.395	0.024	0.47	0.0506	0.296
Type of catheter	0.015	0.815	0.0347	0.276	0.00501	0.912	-0.00192	0.94	0.00869	0.714	-0.0323	0.986
Prostate cancer	0.0466	0.168	0.0226	0.561	0.0228	0.54	0.0212	0.526	0.0188	0.549	0.00486	0.686
Malignancy	0.0426	0.206	0.0371	0.251	0.0246	0.49	0.0173	0.612	0.022	0.46	0.0421	0.285
Hydronephrosis	0.0336	0.367	0.0253	0.498	0.0219	0.562	-0.00572	0.964	-0.000712	0.876	-0.0549	0.995
P-values under 0.05 are in bold, those borderly significant values are in italic

## Sheet: Table S9
Table S9: RDA analysis on residual matrix
Taxonomic rank	Species		Genus		Family		Order		Class		Phylum
	Variance	p-value	Variance	p-value	Variance	p-value	Variance	p-value	Variance	p-value	Variance	p-value
A. schaalii presence/absence	3.9	0.009	2.85	0.001	1.83	0.005	1.44	0.004	1.04	0.002	0.8	0.0006
Age	3.99	0.019	2.99	0.007	2.33	0.002	1.22	0.017	1.04	0.005	0.1	0.696
Hdronephrosis	2.55	0.335	1.21	0.661	0.75	0.607	0.34	0.795	0.28	0.567	0.12	0.655
Prostate cancer	2.59	0.249	1.58	0.394	0.81	0.644	0.61	0.354	0.56	0.094	0.24	0.293
Malignancy	4.05	0.146	2.31	0.188	1.71	0.171	0.95	0.194	0.6	0.135	0.3	0.188
Sex	2.45	0.361	1.6	0.37	1.03	0.345	0.6	0.358	0.43	0.257	0.38	0.105
Material	1.46	0.939	0.74	0.983	0.56	0.895	0.36	0.819	0.19	0.825	0.16	0.517
Type of Catheter	1.19	0.928	0.79	0.912	0.44	0.916	0.22	0.942	0.15	0.87	0.06	0.906
Unexplained variance	77.82		85.93		90.54		94.26		95.71		97.84
P-values under 0.05 are in bold, those borderly significant values are in italic
